# Supplementary material for: New Insights into Clostridium difficile (CD) Infection in Latin America: Novel Description of Toxigenic Profiles of Diarrhea-Associated to CD in Bogotá, Colombia
Source: Front Microbiol. 2018 Jan 30;9:74. doi: 10.3389/fmicb.2018.00074 (PMC5797639; doi:10.3389/fmicb.2018.00074)
Supplement: Supplementary file 7 [file Table7.XLSX]

## Sheet: A1_AF
Description	Max score	Total score	Query cover	E value	Ident	Accession
[Clostridium] difficile strain UK1 toxin A (tcdA) gene, complete cds	438	1296	0.45	6e-119	1	KC292117.1
Clostridium difficile BI1 chromosome, complete sequence	438	1296	0.45	6e-119	1	FN668941.1
Clostridium difficile complete genome, strain 2007855	438	1296	0.45	6e-119	1	FN665654.1
Clostridium difficile R20291 complete genome	438	1296	0.45	6e-119	1	FN545816.1
Clostridium difficile CD196 complete genome, strain CD196	438	1296	0.45	6e-119	1	FN538970.1
Clostridioides difficile strain 630 delta erm, complete genome	411	1274	0.45	1e-110	0.98	CP016318.1
Clostridioides difficile strain FDAARGOS_267, complete genome	411	1268	0.45	1e-110	0.98	CP020424.1
Clostridioides difficile strain BR81, complete genome	411	1296	0.45	1e-110	0.98	CP019870.1
Clostridioides difficile 630, complete genome	411	1274	0.45	1e-110	0.98	CP010905.2
Peptoclostridium difficile ATCC 9689 = DSM 1296, complete genome	411	1268	0.45	1e-110	0.98	CP011968.1
Peptoclostridium difficile genome assembly CD630DERM, chromosome : 1	411	1274	0.45	1e-110	0.98	LN614756.1
[Clostridium] difficile strain VPI10463 toxin A (tcdA) gene, complete cds	411	1290	0.45	1e-110	0.98	KC292122.1
[Clostridium] difficile strain ZR50 toxin A (tcdA) gene, complete cds	411	1272	0.45	1e-110	0.98	KC292116.1
[Clostridium] difficile strain ZR80 toxin A (tcdA) gene, complete cds	411	1301	0.45	1e-110	0.98	KC292092.1
[Clostridium] difficile strain ZR74 toxin A (tcdA) gene, complete cds	411	1274	0.45	1e-110	0.98	KC292072.1
Clostridium difficile ATCC 9689 toxin A (tcdA) gene, complete cds	411	1268	0.45	1e-110	0.98	KC292070.1
[Clostridium] difficile strain ZR81 toxin A (tcdA) gene, complete cds	411	1268	0.45	1e-110	0.98	KC292062.1
[Clostridium] difficile strain GZ1 toxin A (tcdA) gene, complete cds	411	1301	0.45	1e-110	0.98	KC292061.1
Clostridium difficile BI9 chromosome	411	1268	0.45	1e-110	0.98	FN668944.1
Clostridium difficile 630 complete genome	411	1274	0.45	1e-110	0.98	AM180355.1
C.difficile cdu2, cdu1, tcdD, tcdB, tcdE, tcdA, tcdC, cdd1, cdd2, cdd3, and cdd4 genes	411	1290	0.45	1e-110	0.98	X92982.1
C.difficile toxin A gene, complete cds	411	1290	0.45	1e-110	0.98	M30307.1
Clostridium difficile toxA gene for Toxin A and flanks containing an unidentified reading frame	411	1290	0.45	1e-110	0.98	X51797.1
Clostridioides difficile strain LEM1, complete genome	405	1263	0.45	6e-109	0.97	CP019469.1
Peptoclostridium difficile strain 08ACD0030, complete genome	405	1263	0.45	6e-109	0.97	CP010888.1
Peptoclostridium difficile strain ZJCDC-1 disrupted pathogenicity gene locus, partial sequence	405	1285	0.45	6e-109	0.97	KP981374.1
[Clostridium] difficile strain ZR77 toxin A (tcdA) gene, complete cds	405	1263	0.45	6e-109	0.97	KC292125.1
[Clostridium] difficile strain ZR17 toxin A (tcdA) gene, complete cds	405	1279	0.45	6e-109	0.97	KC292104.1
[Clostridium] difficile strain ZR48 toxin A (tcdA) gene, complete cds	405	1263	0.45	6e-109	0.97	KC292059.1
[Clostridium] difficile strain GZ5 toxin A (tcdA) gene, complete cds	405	1263	0.45	6e-109	0.97	KC292058.1
[Clostridium] difficile strain SH8 toxin A (tcdA) gene, complete cds	405	1263	0.45	6e-109	0.97	KC292057.1
Clostridium difficile ribotype 01 toxin A (tcdA) gene, partial cds	399	1263	0.45	3e-107	0.97	AY238985.1
[Clostridium] difficile strain JF09 TcdA (tcdA) gene, complete cds	388	1437	0.45	6e-104	0.96	JQ809335.1
Clostridium difficile complete genome, strain M120	388	1460	0.45	6e-104	0.96	FN665653.1
C.difficile tcdA gene, CROP repeat region	337	500	0.39	2e-88	0.96	Y12616.1
Peptoclostridium difficile BJ08, complete genome	331	500	0.39	1e-86	0.96	CP003939.1
[Clostridium] difficile strain GZ14 truncated toxin A (tcdA) gene, complete cds	331	500	0.39	1e-86	0.96	KC292056.1
Clostridium difficile M68, complete genome	331	500	0.39	1e-86	0.96	FN668375.1
Clostridium difficile complete genome, strain CF5	331	500	0.39	1e-86	0.96	FN665652.1
Clostridium difficile enterotoxin A (tcdA) gene, partial cds	331	500	0.39	1e-86	0.96	AF217291.1
Clostridium difficile gene for toxin A, partial cds	331	500	0.39	1e-86	0.96	AB012304.1
Clostridium difficile strain 654519 toxin A (tcdA) gene, partial cds	326	326	0.35	5e-85	0.98	DQ117247.1
Clostridium difficile strain 630 toxin A (tcdA) gene, partial cds	326	326	0.35	5e-85	0.98	DQ117245.1
Clostridium difficile strain 5933 toxin A (tcdA) gene, partial cds	326	326	0.35	5e-85	0.98	DQ117244.1
Clostridium difficile strain 4984 toxin A (tcdA) gene, partial cds	320	320	0.35	2e-83	0.97	DQ117243.1
Clostridium difficile strain 428 toxin A (tcdA) gene, partial cds	320	320	0.35	2e-83	0.97	DQ117242.1
Clostridium difficile strain 1599 toxin A (tcdA) gene, partial cds	315	315	0.35	1e-81	0.97	DQ117241.1
Clostridium difficile cdtA gene for enterotoxin A, part	241	898	0.37	2e-59	0.89	X17194.1
Clostridium difficile PaLoc containing novel insertion between tcdE and tcdA, strain Ox1485	208	597	0.44	1e-49	0.84	HG002394.1
Clostridium difficile strain 95600 toxin A (tcdA) gene, partial cds	80.6	80.6	0.11	4e-11	0.9	DQ117251.1
Uncultured bacterium clone BD07607 16S ribosomal RNA gene, partial sequence	71.6	71.6	0.21	2e-08	0.72	JQ186152.1
Uncultured Clostridium sp. partial 16S rRNA gene, clone VQ30	68.0	68.0	0.21	2e-07	0.71	AM229436.1
Uncultured Clostridium sp. partial 16S rRNA gene, clone VQ15-Cl1	62.6	62.6	0.21	1e-05	0.71	AM229432.1
Uncultured bacterium clone TANIN5 16S ribosomal RNA gene, partial sequence	60.8	60.8	0.21	4e-05	0.71	GQ120700.1
Uncultured Geobacteraceae bacterium clone ply125 16S ribosomal RNA gene, partial sequence	59.0	59.0	0.14	0.0001	0.75	EF658126.1
Uncultured Firmicutes bacterium clone PM49 16S ribosomal RNA gene, partial sequence	57.2	57.2	0.18	0.0004	0.71	JN412370.1
Uncultured bacterium clone D25 16S ribosomal RNA gene, partial sequence	55.4	55.4	0.21	0.002	0.7	KC701564.1
Uncultured bacterium clone denovo9800_562_46274 16S ribosomal RNA gene, partial sequence	53.6	53.6	0.14	0.005	0.73	MF221581.1
Uncultured Firmicutes bacterium clone PM107 16S ribosomal RNA gene, partial sequence	53.6	53.6	0.2	0.005	0.7	JN412414.1
Uncultured Veillonellaceae bacterium isolate DGGE gel band K312-2-4 16S ribosomal RNA gene, partial sequence	53.6	53.6	0.14	0.005	0.73	GQ351419.1
Uncultured bacterium clone HY1_e05_2 16S ribosomal RNA gene, partial sequence	53.6	53.6	0.21	0.005	0.69	EU458445.1
Uncultured bacterium clone MD23_2aaa03g02 16S ribosomal RNA gene, partial sequence	53.6	53.6	0.21	0.005	0.69	EU507471.1
Uncultured bacterium clone JL-BS-61N0m089 16S ribosomal RNA gene, partial sequence	53.6	53.6	0.14	0.005	0.73	EF582254.1
Plantibacter cousiniae 16S ribosomal RNA gene, partial sequence	53.6	53.6	0.14	0.005	0.73	AF465410.1
Curtobacterium sp. strain R294 16S ribosomal RNA gene, partial sequence	50.0	50.0	0.14	0.066	0.72	KX618428.1
Vibrio alginolyticus strain 27 16S ribosomal RNA gene, partial sequence	50.0	50.0	0.14	0.066	0.72	MF319606.1
Uncultured bacterium clone pegbc3185 16S ribosomal RNA gene, partial sequence	50.0	50.0	0.14	0.066	0.72	KU732821.1
Uncultured bacterium clone OTU289 16S ribosomal RNA gene, partial sequence	50.0	50.0	0.14	0.066	0.72	KX956978.1
Klebsiella sp. PRI8 16S ribosomal RNA gene, partial sequence	50.0	50.0	0.14	0.066	0.72	KJ958508.1
Klebsiella variicola strain D218 16S ribosomal RNA gene, partial sequence	50.0	50.0	0.14	0.066	0.72	KJ499773.1
Bacterium LimA-1-J-25 16S ribosomal RNA gene, partial sequence	50.0	50.0	0.14	0.066	0.72	JF900978.1
Uncultured bacterium clone H75N2_68e06 16S ribosomal RNA gene, partial sequence	50.0	50.0	0.14	0.066	0.72	EU457044.1
Shewanella sp. BSs20149 16S ribosomal RNA gene, partial sequence	50.0	50.0	0.14	0.066	0.72	EU365462.1
Uncultured bacterium G7Clone20 16S ribosomal RNA gene, partial sequence	50.0	50.0	0.14	0.066	0.72	EF149383.1
Serratia grimesii partial 16S rRNA gene, strain N1SM34	50.0	50.0	0.14	0.066	0.72	AM182554.1
Saccharothrix australiensis 16S rRNA	50.0	50.0	0.14	0.066	0.72	X53193.1
PREDICTED: Calidris pugnax sodium/hydrogen exchanger 2-like (LOC106895495), mRNA	48.2	48.2	0.12	0.23	0.78	XM_014954927.1
[Clostridium] difficile strain ZR80 toxin B (tcdB) gene, complete cds	48.2	90.9	0.1	0.23	0.83	KC292190.1
[Clostridium] difficile strain VPI10463 toxin B (tcdB) gene, complete cds	48.2	90.9	0.1	0.23	0.83	KC292162.1
[Clostridium] difficile strain UK1 toxin B (tcdB) gene, complete cds	48.2	48.2	0.18	0.23	0.71	KC292158.1
[Clostridium] difficile strain ZR17 toxin B (tcdB) gene, complete cds	48.2	96.3	0.1	0.23	0.94	KC292157.1
[Clostridium] difficile strain ZR2 toxin B (tcdB) gene, complete cds	48.2	90.9	0.1	0.23	0.83	KC292153.1
[Clostridium] difficile strain US1 toxin B (tcdB) gene, complete cds	48.2	90.9	0.1	0.23	0.83	KC292128.1
[Clostridium] difficile strain ZR4 toxin B (tcdB) gene, complete cds	48.2	90.9	0.1	0.23	0.83	KC292138.1
[Clostridium] difficile strain HN581 toxin B (tcdB) gene, complete cds	48.2	90.9	0.1	0.23	0.83	KC292129.1
[Clostridium] difficile strain SH7 toxin B (tcdB) gene, complete cds	48.2	90.9	0.1	0.23	0.83	KC292127.1
[Clostridium] difficile strain JN128 toxin B (tcdB) gene, complete cds	48.2	90.9	0.1	0.23	0.83	KC292126.1
Clostridium acetobutylicum DSM 1731, complete genome	48.2	48.2	0.07	0.23	0.85	CP002660.1
Clostridium difficile strain SE844 TcdB (tcdB) gene, partial cds	48.2	48.2	0.18	0.23	0.71	HM062511.1
Clostridium difficile strain R12087 TcdB (tcdB) gene, partial cds	48.2	48.2	0.18	0.23	0.71	HM062510.1
Clostridium difficile strain 55767 TcdB (tcdB) gene, partial cds	48.2	96.3	0.1	0.23	0.94	HM062508.1
Clostridium difficile strain 51680 TcdB (tcdB) gene, partial cds	48.2	48.2	0.18	0.23	0.71	HM062504.1
Clostridium difficile strain IS25 TcdB (tcdB) gene, partial cds	48.2	96.3	0.1	0.23	0.94	HM062503.1
Uncultured bacterium clone PS2AB04 16S ribosomal RNA gene, partial sequence	46.4	46.4	0.14	0.80	0.71	HQ273409.1
Uncultured bacterium clone PS3AB77 16S ribosomal RNA gene, partial sequence	46.4	46.4	0.14	0.80	0.71	HQ271623.1
Uncultured Candidatus Rhodoluna sp. clone 2G71 16S ribosomal RNA gene, partial sequence	46.4	46.4	0.14	0.80	0.71	GU074088.1
Streptomyces sp. 16S rRNA gene (partial), strain AG-07	46.4	46.4	0.14	0.80	0.71	X86653.1
Uncultured Oxalobacteraceae bacterium clone 20 16S ribosomal RNA gene, partial sequence	44.6	44.6	0.14	2.8	0.71	HQ462484.1

## Sheet: A1_AR
Description	Max score	Total score	Query cover	E value	Ident	Accession
[Clostridium] difficile strain UK1 toxin A (tcdA) gene, complete cds	421	1860	0.73	6e-114	1	KC292117.1
Clostridium difficile BI1 chromosome, complete sequence	421	1908	0.73	6e-114	1	FN668941.1
Clostridium difficile complete genome, strain 2007855	421	1908	0.73	6e-114	1	FN665654.1
Clostridium difficile R20291 complete genome	421	1908	0.73	6e-114	1	FN545816.1
Clostridium difficile CD196 complete genome, strain CD196	421	1908	0.73	6e-114	1	FN538970.1
Clostridium difficile strain 1599 toxin A (tcdA) gene, partial cds	416	541	0.73	3e-112	0.99	DQ117241.1
Peptoclostridium difficile strain ZJCDC-1 disrupted pathogenicity gene locus, partial sequence	398	1992	0.73	7e-107	0.98	KP981374.1
[Clostridium] difficile strain ZR17 toxin A (tcdA) gene, complete cds	398	1885	0.73	7e-107	0.98	KC292104.1
Clostridium difficile strain 5933 toxin A (tcdA) gene, partial cds	398	508	0.73	7e-107	0.98	DQ117244.1
Clostridium difficile ribotype 01 toxin A (tcdA) gene, partial cds	398	1860	0.73	7e-107	0.98	AY238985.1
Clostridioides difficile strain FDAARGOS_267, complete genome	394	1960	0.73	9e-106	0.97	CP020424.1
Clostridioides difficile strain BR81, complete genome	394	1967	0.73	9e-106	0.97	CP019870.1
Peptoclostridium difficile ATCC 9689 = DSM 1296, complete genome	394	1960	0.73	9e-106	0.97	CP011968.1
[Clostridium] difficile strain VPI10463 toxin A (tcdA) gene, complete cds	394	1864	0.73	9e-106	0.97	KC292122.1
[Clostridium] difficile strain ZR50 toxin A (tcdA) gene, complete cds	394	1858	0.73	9e-106	0.97	KC292116.1
[Clostridium] difficile strain ZR80 toxin A (tcdA) gene, complete cds	394	1874	0.73	9e-106	0.97	KC292092.1
Clostridium difficile ATCC 9689 toxin A (tcdA) gene, complete cds	394	1862	0.73	9e-106	0.97	KC292070.1
[Clostridium] difficile strain ZR81 toxin A (tcdA) gene, complete cds	394	1862	0.73	9e-106	0.97	KC292062.1
[Clostridium] difficile strain GZ1 toxin A (tcdA) gene, complete cds	394	1874	0.73	9e-106	0.97	KC292061.1
Clostridium difficile BI9 chromosome	394	1897	0.73	9e-106	0.97	FN668944.1
Clostridium difficile strain 654519 toxin A (tcdA) gene, partial cds	394	505	0.73	9e-106	0.97	DQ117247.1
C.difficile cdu2, cdu1, tcdD, tcdB, tcdE, tcdA, tcdC, cdd1, cdd2, cdd3, and cdd4 genes	394	1958	0.73	9e-106	0.97	X92982.1
C.difficile toxin A gene, complete cds	394	1864	0.73	9e-106	0.97	M30307.1
Clostridium difficile toxA gene for Toxin A and flanks containing an unidentified reading frame	394	1860	0.73	9e-106	0.97	X51797.1
Clostridioides difficile strain 630 delta erm, complete genome	389	1955	0.73	4e-104	0.97	CP016318.1
Clostridioides difficile strain LEM1, complete genome	389	1955	0.73	4e-104	0.97	CP019469.1
Clostridioides difficile 630, complete genome	389	1955	0.73	4e-104	0.97	CP010905.2
Peptoclostridium difficile strain 08ACD0030, complete genome	389	1955	0.73	4e-104	0.97	CP010888.1
Peptoclostridium difficile genome assembly CD630DERM, chromosome : 1	389	1955	0.73	4e-104	0.97	LN614756.1
[Clostridium] difficile strain ZR77 toxin A (tcdA) gene, complete cds	389	1855	0.73	4e-104	0.97	KC292125.1
[Clostridium] difficile strain ZR74 toxin A (tcdA) gene, complete cds	389	1856	0.73	4e-104	0.97	KC292072.1
[Clostridium] difficile strain ZR48 toxin A (tcdA) gene, complete cds	389	1856	0.73	4e-104	0.97	KC292059.1
[Clostridium] difficile strain GZ5 toxin A (tcdA) gene, complete cds	389	1856	0.73	4e-104	0.97	KC292058.1
[Clostridium] difficile strain SH8 toxin A (tcdA) gene, complete cds	389	1856	0.73	4e-104	0.97	KC292057.1
Clostridium difficile 630 complete genome	389	1955	0.73	4e-104	0.97	AM180355.1
Clostridium difficile strain 630 toxin A (tcdA) gene, partial cds	389	499	0.73	4e-104	0.97	DQ117245.1
Clostridium difficile strain 428 toxin A (tcdA) gene, partial cds	389	499	0.73	4e-104	0.97	DQ117242.1
[Clostridium] difficile strain JF09 TcdA (tcdA) gene, complete cds	379	1901	0.73	2e-101	0.96	JQ809335.1
Clostridium difficile complete genome, strain M120	379	2033	0.73	2e-101	0.96	FN665653.1
Clostridium difficile strain 4984 toxin A (tcdA) gene, partial cds	379	499	0.73	2e-101	0.96	DQ117243.1
[Clostridium] sordellii genome assembly JGS6382, plasmid : pCS1	221	1312	0.65	1e-53	0.81	LN681235.1
Paeniclostridium sordellii strain VPI 9048 TcsH (tcsH) gene, complete cds	221	1262	0.65	1e-53	0.81	KC814176.1
Clostridium difficile cdtA gene for enterotoxin A, part	179	1306	0.65	3e-41	0.81	X17194.1
Peptoclostridium difficile BJ08, complete genome	176	669	0.73	4e-40	0.81	CP003939.1
[Clostridium] difficile strain GZ14 truncated toxin A (tcdA) gene, complete cds	176	570	0.73	4e-40	0.81	KC292056.1
Clostridium difficile M68, complete genome	176	669	0.73	4e-40	0.81	FN668375.1
Clostridium difficile complete genome, strain CF5	176	669	0.73	4e-40	0.81	FN665652.1
Clostridium difficile enterotoxin A (tcdA) gene, partial cds	176	570	0.73	4e-40	0.81	AF217291.1
Clostridium difficile gene for toxin A, partial cds	176	570	0.73	4e-40	0.81	AB012304.1
C.difficile tcdA gene, CROP repeat region	170	552	0.73	2e-38	0.8	Y12616.1
Clostridium difficile PaLoc containing novel insertion between tcdE and tcdA, strain Ox1485	125	454	0.64	7e-25	0.76	HG002394.1
Clostridium difficile strain 95600 toxin A (tcdA) gene, partial cds	86.0	134	0.22	6e-13	0.96	DQ117251.1
[Clostridium] difficile strain ZR80 toxin B (tcdB) gene, complete cds	55.4	98.2	0.3	0.001	0.72	KC292190.1
[Clostridium] difficile strain VPI10463 toxin B (tcdB) gene, complete cds	55.4	98.2	0.3	0.001	0.72	KC292162.1
[Clostridium] difficile strain ZR17 toxin B (tcdB) gene, complete cds	55.4	103	0.3	0.001	0.72	KC292157.1
[Clostridium] difficile strain ZR2 toxin B (tcdB) gene, complete cds	55.4	98.2	0.3	0.001	0.72	KC292153.1
[Clostridium] difficile strain US1 toxin B (tcdB) gene, complete cds	55.4	98.2	0.3	0.001	0.72	KC292128.1
[Clostridium] difficile strain ZR4 toxin B (tcdB) gene, complete cds	55.4	98.2	0.3	0.001	0.72	KC292138.1
[Clostridium] difficile strain HN581 toxin B (tcdB) gene, complete cds	55.4	98.2	0.3	0.001	0.72	KC292129.1
[Clostridium] difficile strain SH7 toxin B (tcdB) gene, complete cds	55.4	98.2	0.3	0.001	0.72	KC292127.1
[Clostridium] difficile strain JN128 toxin B (tcdB) gene, complete cds	55.4	98.2	0.3	0.001	0.72	KC292126.1
Clostridium difficile strain 55767 TcdB (tcdB) gene, partial cds	55.4	103	0.3	0.001	0.72	HM062508.1
Clostridium difficile strain IS25 TcdB (tcdB) gene, partial cds	55.4	103	0.3	0.001	0.72	HM062503.1
Clostridium difficile strain CH6223 TcdB (tcdB) gene, partial cds	55.4	98.2	0.3	0.001	0.72	HM062499.1
Clostridium difficile ribotype 17 toxin B (tcdB) gene, partial cds	55.4	98.2	0.3	0.001	0.72	AY238987.1
Clostridium difficile ribotype 01 toxin B (tcdB) gene, partial cds	55.4	98.2	0.3	0.001	0.72	AY238986.1
C.difficile gene for toxin B	55.4	98.2	0.3	0.001	0.72	Z23277.1
C.difficile toxB and toxA genes for toxins B & A and utxA gene	55.4	98.2	0.3	0.001	0.72	X60984.1
Clostridium difficile toxB gene for toxin B	55.4	98.2	0.3	0.001	0.72	X53138.1
PREDICTED: Trichogramma pretiosum uncharacterized LOC106650749 (LOC106650749), mRNA	53.6	53.6	0.13	0.004	0.9	XM_014368952.1
Clostridium difficile cytotoxin B (tcdB) gene, complete cds	53.6	96.3	0.3	0.004	0.74	AF217292.1
[Clostridium] sordellii genome assembly JGS6364, plasmid : pCS1	50.0	94.5	0.57	0.043	0.71	LN681232.1
[Clostridium] sordellii genome assembly ATCC9714_, plasmid : pCS1	50.0	94.5	0.57	0.043	0.71	LN679999.1
Hymenolepis diminuta genome assembly H_diminuta_Denmark, scaffold HDID_contig0000409	50.0	50.0	0.09	0.043	0.94	LM384302.1
Strongyloides papillosus genome assembly S_papillosus_LIN, scaffold SPAL_contig0000015	50.0	50.0	0.11	0.043	0.86	LM525603.1
[Clostridium] sordellii strain AIP82 cytotoxin L (tcsL) gene, complete cds	50.0	94.5	0.57	0.043	0.71	KF726114.1
[Clostridium] sordellii strain VPI 9048 cytotoxin L (tcsL) gene, complete cds	50.0	50.0	0.27	0.043	0.71	KF726110.1
[Clostridium] difficile strain JF09 TcdB (tcdB) gene, partial cds	50.0	94.5	0.3	0.043	0.71	JQ809336.1
Clostridium difficile strain SE844 TcdB (tcdB) gene, partial cds	50.0	50.0	0.28	0.043	0.71	HM062511.1
Clostridium difficile strain SE881 TcdB-like (tcdB) gene, partial sequence	50.0	94.5	0.3	0.043	0.71	HM062507.1
Clostridium difficile strain 51377 TcdB (tcdB) gene, partial cds	50.0	94.5	0.3	0.043	0.71	HM062506.1
Clostridium difficile strain 57267 TcdB (tcdB) gene, partial cds	50.0	94.5	0.3	0.043	0.71	HM062505.1
Clostridium difficile strain SUC36 TcdB (tcdB) gene, partial cds	50.0	94.5	0.3	0.043	0.71	HM062501.1
Vitis vinifera contig VV78X079628.8, whole genome shotgun sequence	50.0	50.0	0.09	0.043	0.94	AM466959.2
Homo sapiens 3 BAC CTD-2501O3 (Cal Tech Human BAC Library D) complete sequence	50.0	50.0	0.12	0.043	0.86	AC117485.4
Clostridium difficile (strain 8864) pathogenicity DNA locus (tcdD, tcdB, tcdE, tcdA and partial cdd1 and cdu1 genes)	50.0	50.0	0.28	0.043	0.71	AJ011301.1
C.sordelii cytotoxin gene	50.0	94.5	0.57	0.043	0.71	X82638.1
Schistosoma mattheei genome assembly S_mattheei_Denwood, scaffold SMTD_scaffold0005776	48.2	48.2	0.12	0.15	0.84	LM155363.1
[Clostridium] difficile strain UK1 toxin B (tcdB) gene, complete cds	48.2	48.2	0.28	0.15	0.71	KC292158.1
Clostridium difficile strain R12087 TcdB (tcdB) gene, partial cds	48.2	48.2	0.28	0.15	0.71	HM062510.1
Clostridium difficile strain 51680 TcdB (tcdB) gene, partial cds	48.2	48.2	0.28	0.15	0.71	HM062504.1
Clostridium difficile strain R9385 TcdB (tcdB) gene, partial cds	48.2	48.2	0.28	0.15	0.71	HM062502.1
Clostridium difficile strain J9965 TcdB (tcdB) gene, partial cds	48.2	48.2	0.28	0.15	0.71	HM062500.1
Clostridium difficile strain OI TcdB (tcdB) gene, partial cds	48.2	48.2	0.28	0.15	0.71	HM062498.1
PREDICTED: Rhinolophus sinicus cilia and flagella associated protein 97 (CFAP97), transcript variant X4, mRNA	46.4	46.4	0.13	0.52	0.83	XM_019736076.1
PREDICTED: Rhinolophus sinicus cilia and flagella associated protein 97 (CFAP97), transcript variant X3, mRNA	46.4	46.4	0.13	0.52	0.83	XM_019736075.1
PREDICTED: Rhinolophus sinicus cilia and flagella associated protein 97 (CFAP97), transcript variant X2, mRNA	46.4	46.4	0.13	0.52	0.83	XM_019736074.1
PREDICTED: Rhinolophus sinicus cilia and flagella associated protein 97 (CFAP97), transcript variant X1, mRNA	46.4	46.4	0.13	0.52	0.83	XM_019736073.1
PREDICTED: Apis mellifera mitochondrial 2-oxoglutarate/malate carrier protein-like (LOC552016), mRNA	46.4	46.4	0.1	0.52	0.87	XM_624396.5
Methanobrevibacter olleyae strain YLM1, complete genome	46.4	46.4	0.09	0.52	0.91	CP014265.1

## Sheet: A2_AF_
Description	Max score	Total score	Query cover	E value	Ident	Accession
[Clostridium] difficile strain UK1 toxin A (tcdA) gene, complete cds	533	2715	0.86	1e-147	0.98	KC292117.1
Clostridium difficile BI1 chromosome, complete sequence	533	2766	0.86	1e-147	0.98	FN668941.1
Clostridium difficile complete genome, strain 2007855	533	2766	0.86	1e-147	0.98	FN665654.1
Clostridium difficile R20291 complete genome	533	2766	0.86	1e-147	0.98	FN545816.1
Clostridium difficile CD196 complete genome, strain CD196	533	2766	0.86	1e-147	0.98	FN538970.1
Clostridioides difficile strain 630 delta erm, complete genome	506	2804	0.86	2e-139	0.96	CP016318.1
Clostridioides difficile strain FDAARGOS_267, complete genome	506	2801	0.86	2e-139	0.96	CP020424.1
Clostridioides difficile strain BR81, complete genome	506	2824	0.86	2e-139	0.96	CP019870.1
Clostridioides difficile 630, complete genome	506	2804	0.86	2e-139	0.96	CP010905.2
Peptoclostridium difficile ATCC 9689 = DSM 1296, complete genome	506	2801	0.86	2e-139	0.96	CP011968.1
Peptoclostridium difficile genome assembly CD630DERM, chromosome : 1	506	2804	0.86	2e-139	0.96	LN614756.1
[Clostridium] difficile strain VPI10463 toxin A (tcdA) gene, complete cds	506	2726	0.86	2e-139	0.96	KC292122.1
[Clostridium] difficile strain ZR50 toxin A (tcdA) gene, complete cds	506	2702	0.86	2e-139	0.96	KC292116.1
[Clostridium] difficile strain ZR80 toxin A (tcdA) gene, complete cds	506	2735	0.86	2e-139	0.96	KC292092.1
[Clostridium] difficile strain ZR74 toxin A (tcdA) gene, complete cds	506	2706	0.86	2e-139	0.96	KC292072.1
Clostridium difficile ATCC 9689 toxin A (tcdA) gene, complete cds	506	2702	0.86	2e-139	0.96	KC292070.1
[Clostridium] difficile strain ZR81 toxin A (tcdA) gene, complete cds	506	2702	0.86	2e-139	0.96	KC292062.1
[Clostridium] difficile strain GZ1 toxin A (tcdA) gene, complete cds	506	2735	0.86	2e-139	0.96	KC292061.1
Clostridium difficile BI9 chromosome	506	2737	0.86	2e-139	0.96	FN668944.1
Clostridium difficile 630 complete genome	506	2804	0.86	2e-139	0.96	AM180355.1
C.difficile cdu2, cdu1, tcdD, tcdB, tcdE, tcdA, tcdC, cdd1, cdd2, cdd3, and cdd4 genes	506	2819	0.86	2e-139	0.96	X92982.1
C.difficile toxin A gene, complete cds	506	2726	0.86	2e-139	0.96	M30307.1
Clostridium difficile toxA gene for Toxin A and flanks containing an unidentified reading frame	506	2720	0.86	2e-139	0.96	X51797.1
Clostridioides difficile strain LEM1, complete genome	502	2797	0.86	2e-138	0.96	CP019469.1
Peptoclostridium difficile strain 08ACD0030, complete genome	502	2797	0.86	2e-138	0.96	CP010888.1
Peptoclostridium difficile strain ZJCDC-1 disrupted pathogenicity gene locus, partial sequence	502	2876	0.86	2e-138	0.96	KP981374.1
[Clostridium] difficile strain ZR77 toxin A (tcdA) gene, complete cds	502	2695	0.86	2e-138	0.96	KC292125.1
[Clostridium] difficile strain ZR17 toxin A (tcdA) gene, complete cds	502	2769	0.86	2e-138	0.96	KC292104.1
[Clostridium] difficile strain ZR48 toxin A (tcdA) gene, complete cds	502	2704	0.86	2e-138	0.96	KC292059.1
[Clostridium] difficile strain GZ5 toxin A (tcdA) gene, complete cds	502	2699	0.86	2e-138	0.96	KC292058.1
[Clostridium] difficile strain SH8 toxin A (tcdA) gene, complete cds	502	2699	0.86	2e-138	0.96	KC292057.1
Clostridium difficile ribotype 01 toxin A (tcdA) gene, partial cds	497	2697	0.86	1e-136	0.96	AY238985.1
[Clostridium] difficile strain JF09 TcdA (tcdA) gene, complete cds	470	2663	0.86	1e-128	0.94	JQ809335.1
Clostridium difficile complete genome, strain M120	470	2828	0.86	1e-128	0.94	FN665653.1
Clostridium difficile strain 654519 toxin A (tcdA) gene, partial cds	443	539	0.86	2e-120	0.96	DQ117247.1
Clostridium difficile strain 630 toxin A (tcdA) gene, partial cds	443	545	0.86	2e-120	0.96	DQ117245.1
Clostridium difficile strain 5933 toxin A (tcdA) gene, partial cds	443	545	0.86	2e-120	0.96	DQ117244.1
Clostridium difficile strain 1599 toxin A (tcdA) gene, partial cds	437	530	0.86	8e-119	0.96	DQ117241.1
Clostridium difficile strain 428 toxin A (tcdA) gene, partial cds	437	534	0.86	8e-119	0.96	DQ117242.1
Clostridium difficile strain 4984 toxin A (tcdA) gene, partial cds	419	521	0.86	2e-113	0.94	DQ117243.1
Peptoclostridium difficile BJ08, complete genome	361	852	0.84	5e-96	0.86	CP003939.1
[Clostridium] difficile strain GZ14 truncated toxin A (tcdA) gene, complete cds	361	754	0.84	5e-96	0.86	KC292056.1
Clostridium difficile M68, complete genome	361	852	0.84	5e-96	0.86	FN668375.1
Clostridium difficile complete genome, strain CF5	361	852	0.84	5e-96	0.86	FN665652.1
Clostridium difficile enterotoxin A (tcdA) gene, partial cds	361	754	0.84	5e-96	0.86	AF217291.1
C.difficile tcdA gene, CROP repeat region	361	749	0.84	5e-96	0.86	Y12616.1
Clostridium difficile gene for toxin A, partial cds	361	754	0.84	5e-96	0.86	AB012304.1
Clostridium difficile cdtA gene for enterotoxin A, part	313	2339	0.85	2e-81	0.83	X17194.1
[Clostridium] sordellii genome assembly JGS6382, plasmid : pCS1	286	1665	0.84	3e-73	0.81	LN681235.1
Paeniclostridium sordellii strain VPI 9048 TcsH (tcsH) gene, complete cds	286	1615	0.84	3e-73	0.81	KC814176.1
Clostridium difficile PaLoc containing novel insertion between tcdE and tcdA, strain Ox1485	244	697	0.84	1e-60	0.78	HG002394.1
Clostridium difficile strain 95600 toxin A (tcdA) gene, partial cds	80.6	80.6	0.16	3e-11	0.9	DQ117251.1
[Clostridium] sordellii genome assembly JGS6364, plasmid : pCS1	55.4	105	0.45	0.001	0.69	LN681232.1
[Clostridium] difficile strain ZR80 toxin B (tcdB) gene, complete cds	55.4	98.2	0.3	0.001	0.73	KC292190.1
[Clostridium] difficile strain VPI10463 toxin B (tcdB) gene, complete cds	55.4	98.2	0.3	0.001	0.73	KC292162.1
[Clostridium] difficile strain ZR17 toxin B (tcdB) gene, complete cds	55.4	103	0.3	0.001	0.73	KC292157.1
[Clostridium] difficile strain ZR2 toxin B (tcdB) gene, complete cds	55.4	98.2	0.3	0.001	0.73	KC292153.1
[Clostridium] difficile strain US1 toxin B (tcdB) gene, complete cds	55.4	98.2	0.3	0.001	0.73	KC292128.1
[Clostridium] difficile strain ZR4 toxin B (tcdB) gene, complete cds	55.4	98.2	0.3	0.001	0.73	KC292138.1
[Clostridium] difficile strain HN581 toxin B (tcdB) gene, complete cds	55.4	98.2	0.3	0.001	0.73	KC292129.1
[Clostridium] difficile strain SH7 toxin B (tcdB) gene, complete cds	55.4	98.2	0.3	0.001	0.73	KC292127.1
[Clostridium] difficile strain JN128 toxin B (tcdB) gene, complete cds	55.4	98.2	0.3	0.001	0.73	KC292126.1
Clostridium difficile strain 55767 TcdB (tcdB) gene, partial cds	55.4	103	0.3	0.001	0.73	HM062508.1
Clostridium difficile strain IS25 TcdB (tcdB) gene, partial cds	55.4	103	0.3	0.001	0.73	HM062503.1
Clostridium difficile strain CH6223 TcdB (tcdB) gene, partial cds	55.4	98.2	0.3	0.001	0.73	HM062499.1
Clostridium difficile ribotype 17 toxin B (tcdB) gene, partial cds	55.4	98.2	0.3	0.001	0.73	AY238987.1
Clostridium difficile ribotype 01 toxin B (tcdB) gene, partial cds	55.4	98.2	0.3	0.001	0.73	AY238986.1
C.difficile gene for toxin B	55.4	98.2	0.3	0.001	0.73	Z23277.1
C.difficile toxB and toxA genes for toxins B & A and utxA gene	55.4	98.2	0.3	0.001	0.73	X60984.1
Clostridium difficile toxB gene for toxin B	55.4	98.2	0.3	0.001	0.73	X53138.1
Clostridium difficile strain SE844 TcdB (tcdB) gene, partial cds	53.6	53.6	0.35	0.004	0.69	HM062511.1
Clostridium difficile (strain 8864) pathogenicity DNA locus (tcdD, tcdB, tcdE, tcdA and partial cdd1 and cdu1 genes)	53.6	53.6	0.35	0.004	0.69	AJ011301.1
Clostridium difficile cytotoxin B (tcdB) gene, complete cds	53.6	96.3	0.3	0.004	0.75	AF217292.1
[Clostridium] difficile strain UK1 toxin B (tcdB) gene, complete cds	51.8	51.8	0.35	0.012	0.69	KC292158.1
Clostridium difficile strain R12087 TcdB (tcdB) gene, partial cds	51.8	51.8	0.35	0.012	0.69	HM062510.1
Clostridium difficile strain 51680 TcdB (tcdB) gene, partial cds	51.8	51.8	0.35	0.012	0.69	HM062504.1
Clostridium difficile strain R9385 TcdB (tcdB) gene, partial cds	51.8	51.8	0.35	0.012	0.69	HM062502.1
Clostridium difficile strain J9965 TcdB (tcdB) gene, partial cds	51.8	51.8	0.35	0.012	0.69	HM062500.1
Clostridium difficile strain OI TcdB (tcdB) gene, partial cds	51.8	51.8	0.35	0.012	0.69	HM062498.1
[Clostridium] sordellii genome assembly ATCC9714_, plasmid : pCS1	50.0	96.3	0.44	0.043	0.71	LN679999.1
Hymenolepis diminuta genome assembly H_diminuta_Denmark, scaffold HDID_contig0000409	50.0	50.0	0.09	0.043	0.94	LM384302.1
Strongyloides papillosus genome assembly S_papillosus_LIN, scaffold SPAL_contig0000015	50.0	50.0	0.11	0.043	0.86	LM525603.1
[Clostridium] sordellii strain AIP82 cytotoxin L (tcsL) gene, complete cds	50.0	96.3	0.44	0.043	0.71	KF726114.1
[Clostridium] sordellii strain VPI 9048 cytotoxin L (tcsL) gene, complete cds	50.0	50.0	0.27	0.043	0.71	KF726110.1
[Clostridium] difficile strain JF09 TcdB (tcdB) gene, partial cds	50.0	94.5	0.3	0.043	0.72	JQ809336.1
Clostridium difficile strain SE881 TcdB-like (tcdB) gene, partial sequence	50.0	94.5	0.3	0.043	0.72	HM062507.1
Clostridium difficile strain 51377 TcdB (tcdB) gene, partial cds	50.0	94.5	0.3	0.043	0.72	HM062506.1
Clostridium difficile strain 57267 TcdB (tcdB) gene, partial cds	50.0	94.5	0.3	0.043	0.72	HM062505.1
Clostridium difficile strain SUC36 TcdB (tcdB) gene, partial cds	50.0	94.5	0.3	0.043	0.72	HM062501.1
Vitis vinifera contig VV78X079628.8, whole genome shotgun sequence	50.0	50.0	0.09	0.043	0.94	AM466959.2
C.sordelii cytotoxin gene	50.0	96.3	0.44	0.043	0.71	X82638.1
Schistosoma mattheei genome assembly S_mattheei_Denwood, scaffold SMTD_scaffold0005776	48.2	48.2	0.12	0.15	0.84	LM155363.1
Clostridium acetobutylicum DSM 1731, complete genome	48.2	48.2	0.11	0.15	0.85	CP002660.1
Clostridium acetobutylicum EA 2018, complete genome	48.2	48.2	0.11	0.15	0.85	CP002118.1
Clostridium acetobutylicum ATCC 824, complete genome	48.2	48.2	0.11	0.15	0.85	AE001437.1
PREDICTED: Rhinolophus sinicus cilia and flagella associated protein 97 (CFAP97), transcript variant X4, mRNA	46.4	46.4	0.13	0.52	0.83	XM_019736076.1
PREDICTED: Rhinolophus sinicus cilia and flagella associated protein 97 (CFAP97), transcript variant X3, mRNA	46.4	46.4	0.13	0.52	0.83	XM_019736075.1
PREDICTED: Rhinolophus sinicus cilia and flagella associated protein 97 (CFAP97), transcript variant X2, mRNA	46.4	46.4	0.13	0.52	0.83	XM_019736074.1
PREDICTED: Rhinolophus sinicus cilia and flagella associated protein 97 (CFAP97), transcript variant X1, mRNA	46.4	46.4	0.13	0.52	0.83	XM_019736073.1
PREDICTED: Apis mellifera mitochondrial 2-oxoglutarate/malate carrier protein-like (LOC552016), mRNA	46.4	46.4	0.1	0.52	0.87	XM_624396.5

## Sheet: A2_AR
Description	Max score	Total score	Query cover	E value	Ident	Accession
[Clostridium] difficile strain UK1 toxin A (tcdA) gene, complete cds	568	1169	0.62	7e-158	0.98	KC292117.1
Clostridium difficile BI1 chromosome, complete sequence	568	1169	0.62	7e-158	0.98	FN668941.1
Clostridium difficile complete genome, strain 2007855	568	1169	0.62	7e-158	0.98	FN665654.1
Clostridium difficile R20291 complete genome	568	1169	0.62	7e-158	0.98	FN545816.1
Clostridium difficile CD196 complete genome, strain CD196	568	1169	0.62	7e-158	0.98	FN538970.1
Clostridium difficile strain 5933 toxin A (tcdA) gene, partial cds	542	542	0.61	4e-150	0.97	DQ117244.1
Clostridioides difficile strain FDAARGOS_267, complete genome	536	1175	0.62	2e-148	0.97	CP020424.1
Clostridioides difficile strain BR81, complete genome	536	1202	0.62	2e-148	0.97	CP019870.1
Peptoclostridium difficile ATCC 9689 = DSM 1296, complete genome	536	1175	0.62	2e-148	0.97	CP011968.1
[Clostridium] difficile strain VPI10463 toxin A (tcdA) gene, complete cds	536	1202	0.62	2e-148	0.97	KC292122.1
[Clostridium] difficile strain ZR50 toxin A (tcdA) gene, complete cds	536	1169	0.62	2e-148	0.97	KC292116.1
[Clostridium] difficile strain ZR80 toxin A (tcdA) gene, complete cds	536	1202	0.62	2e-148	0.97	KC292092.1
Clostridium difficile ATCC 9689 toxin A (tcdA) gene, complete cds	536	1175	0.62	2e-148	0.97	KC292070.1
[Clostridium] difficile strain ZR81 toxin A (tcdA) gene, complete cds	536	1175	0.62	2e-148	0.97	KC292062.1
[Clostridium] difficile strain GZ1 toxin A (tcdA) gene, complete cds	536	1202	0.62	2e-148	0.97	KC292061.1
Clostridium difficile BI9 chromosome	536	1147	0.62	2e-148	0.97	FN668944.1
Clostridium difficile strain 1599 toxin A (tcdA) gene, partial cds	536	536	0.61	2e-148	0.97	DQ117241.1
Clostridium difficile strain 654519 toxin A (tcdA) gene, partial cds	536	536	0.61	2e-148	0.97	DQ117247.1
Clostridium difficile ribotype 01 toxin A (tcdA) gene, partial cds	536	1180	0.62	2e-148	0.97	AY238985.1
C.difficile cdu2, cdu1, tcdD, tcdB, tcdE, tcdA, tcdC, cdd1, cdd2, cdd3, and cdd4 genes	536	1202	0.62	2e-148	0.97	X92982.1
C.difficile toxin A gene, complete cds	536	1202	0.62	2e-148	0.97	M30307.1
Clostridium difficile toxA gene for Toxin A and flanks containing an unidentified reading frame	536	1202	0.62	2e-148	0.97	X51797.1
Clostridioides difficile strain 630 delta erm, complete genome	531	1169	0.62	9e-147	0.97	CP016318.1
Clostridioides difficile strain LEM1, complete genome	531	1169	0.62	9e-147	0.97	CP019469.1
Clostridioides difficile 630, complete genome	531	1169	0.62	9e-147	0.97	CP010905.2
Peptoclostridium difficile strain 08ACD0030, complete genome	531	1169	0.62	9e-147	0.97	CP010888.1
Peptoclostridium difficile strain ZJCDC-1 disrupted pathogenicity gene locus, partial sequence	531	1147	0.62	9e-147	0.97	KP981374.1
Peptoclostridium difficile genome assembly CD630DERM, chromosome : 1	531	1169	0.62	9e-147	0.97	LN614756.1
[Clostridium] difficile strain ZR77 toxin A (tcdA) gene, complete cds	531	1169	0.62	9e-147	0.97	KC292125.1
[Clostridium] difficile strain ZR17 toxin A (tcdA) gene, complete cds	531	1142	0.62	9e-147	0.97	KC292104.1
[Clostridium] difficile strain ZR74 toxin A (tcdA) gene, complete cds	531	1169	0.62	9e-147	0.97	KC292072.1
[Clostridium] difficile strain ZR48 toxin A (tcdA) gene, complete cds	531	1169	0.62	9e-147	0.97	KC292059.1
[Clostridium] difficile strain GZ5 toxin A (tcdA) gene, complete cds	531	1169	0.62	9e-147	0.97	KC292058.1
[Clostridium] difficile strain SH8 toxin A (tcdA) gene, complete cds	531	1169	0.62	9e-147	0.97	KC292057.1
Clostridium difficile 630 complete genome	531	1169	0.62	9e-147	0.97	AM180355.1
Clostridium difficile strain 630 toxin A (tcdA) gene, partial cds	531	531	0.61	9e-147	0.97	DQ117245.1
Clostridium difficile strain 428 toxin A (tcdA) gene, partial cds	531	531	0.61	9e-147	0.97	DQ117242.1
[Clostridium] difficile strain JF09 TcdA (tcdA) gene, complete cds	508	1138	0.62	4e-140	0.96	JQ809335.1
Clostridium difficile complete genome, strain M120	508	1195	0.62	4e-140	0.96	FN665653.1
Clostridium difficile strain 4984 toxin A (tcdA) gene, partial cds	508	508	0.61	4e-140	0.96	DQ117243.1
Peptoclostridium difficile BJ08, complete genome	255	391	0.61	6e-64	0.84	CP003939.1
[Clostridium] difficile strain GZ14 truncated toxin A (tcdA) gene, complete cds	255	391	0.61	6e-64	0.84	KC292056.1
Clostridium difficile M68, complete genome	255	391	0.61	6e-64	0.84	FN668375.1
Clostridium difficile complete genome, strain CF5	255	391	0.61	6e-64	0.84	FN665652.1
Clostridium difficile enterotoxin A (tcdA) gene, partial cds	255	391	0.61	6e-64	0.84	AF217291.1
Clostridium difficile gene for toxin A, partial cds	255	391	0.61	6e-64	0.84	AB012304.1
C.difficile tcdA gene, CROP repeat region	250	380	0.61	3e-62	0.83	Y12616.1
Clostridium difficile cdtA gene for enterotoxin A, part	222	618	0.53	6e-54	0.81	X17194.1
Clostridium difficile strain 95600 toxin A (tcdA) gene, partial cds	91.6	91.6	0.1	2e-14	0.98	DQ117251.1

## Sheet: A3_AF_
Description	Max score	Total score	Query cover	E value	Ident	Accession
Clostridioides difficile strain LEM1, complete genome	560	5237	0.93	1e-155	0.98	CP019469.1
Peptoclostridium difficile strain 08ACD0030, complete genome	560	5251	0.93	1e-155	0.98	CP010888.1
[Clostridium] difficile strain GZ5 toxin A (tcdA) gene, complete cds	560	2757	0.64	1e-155	0.98	KC292058.1
Clostridioides difficile strain 630 delta erm, complete genome	554	5253	0.93	6e-154	0.98	CP016318.1
Clostridioides difficile strain FDAARGOS_267, complete genome	554	5242	0.93	6e-154	0.98	CP020424.1
Clostridioides difficile strain BR81, complete genome	554	5266	0.93	6e-154	0.98	CP019870.1
Clostridioides difficile 630, complete genome	554	5253	0.93	6e-154	0.98	CP010905.2
Peptoclostridium difficile ATCC 9689 = DSM 1296, complete genome	554	5242	0.93	6e-154	0.98	CP011968.1
Peptoclostridium difficile genome assembly CD630DERM, chromosome : 1	554	5253	0.93	6e-154	0.98	LN614756.1
[Clostridium] difficile strain VPI10463 toxin A (tcdA) gene, complete cds	554	2775	0.64	6e-154	0.98	KC292122.1
[Clostridium] difficile strain ZR50 toxin A (tcdA) gene, complete cds	554	2751	0.64	6e-154	0.98	KC292116.1
[Clostridium] difficile strain ZR80 toxin A (tcdA) gene, complete cds	554	2784	0.64	6e-154	0.98	KC292092.1
[Clostridium] difficile strain ZR74 toxin A (tcdA) gene, complete cds	554	2755	0.64	6e-154	0.98	KC292072.1
Clostridium difficile ATCC 9689 toxin A (tcdA) gene, complete cds	554	2751	0.64	6e-154	0.98	KC292070.1
[Clostridium] difficile strain ZR81 toxin A (tcdA) gene, complete cds	554	2751	0.64	6e-154	0.98	KC292062.1
[Clostridium] difficile strain GZ1 toxin A (tcdA) gene, complete cds	554	2784	0.64	6e-154	0.98	KC292061.1
Clostridium difficile BI9 chromosome	554	2929	0.93	6e-154	0.98	FN668944.1
Clostridium difficile 630 complete genome	554	5048	0.93	6e-154	0.98	AM180355.1
C.difficile cdu2, cdu1, tcdD, tcdB, tcdE, tcdA, tcdC, cdd1, cdd2, cdd3, and cdd4 genes	554	2817	0.64	6e-154	0.98	X92982.1
C.difficile toxin A gene, complete cds	554	2775	0.64	6e-154	0.98	M30307.1
Clostridium difficile toxA gene for Toxin A and flanks containing an unidentified reading frame	554	2769	0.64	6e-154	0.98	X51797.1
[Clostridium] difficile strain ZR77 toxin A (tcdA) gene, complete cds	551	2744	0.64	8e-153	0.97	KC292125.1
[Clostridium] difficile strain ZR48 toxin A (tcdA) gene, complete cds	551	2753	0.64	8e-153	0.97	KC292059.1
[Clostridium] difficile strain SH8 toxin A (tcdA) gene, complete cds	551	2748	0.64	8e-153	0.97	KC292057.1
Clostridium difficile ribotype 01 toxin A (tcdA) gene, partial cds	545	2753	0.64	3e-151	0.97	AY238985.1
[Clostridium] difficile strain UK1 toxin A (tcdA) gene, complete cds	527	2720	0.64	9e-146	0.96	KC292117.1
Clostridium difficile BI1 chromosome, complete sequence	527	5234	0.93	9e-146	0.96	FN668941.1
Clostridium difficile complete genome, strain 2007855	527	4603	0.93	9e-146	0.96	FN665654.1
Clostridium difficile R20291 complete genome	527	4607	0.93	9e-146	0.96	FN545816.1
Clostridium difficile CD196 complete genome, strain CD196	527	4824	0.93	9e-146	0.96	FN538970.1
Peptoclostridium difficile strain ZJCDC-1 disrupted pathogenicity gene locus, partial sequence	517	2871	0.64	2e-142	0.95	KP981374.1
[Clostridium] difficile strain ZR17 toxin A (tcdA) gene, complete cds	517	2819	0.64	2e-142	0.95	KC292104.1
[Clostridium] difficile strain JF09 TcdA (tcdA) gene, complete cds	497	2693	0.64	1e-136	0.94	JQ809335.1
Clostridium difficile complete genome, strain M120	497	5091	0.93	1e-136	0.94	FN665653.1
Clostridium difficile strain 428 toxin A (tcdA) gene, partial cds	482	592	0.64	3e-132	0.99	DQ117242.1
Clostridium difficile strain 654519 toxin A (tcdA) gene, partial cds	479	588	0.64	4e-131	0.98	DQ117247.1
Clostridium difficile strain 630 toxin A (tcdA) gene, partial cds	479	592	0.64	4e-131	0.98	DQ117245.1
Clostridium difficile strain 5933 toxin A (tcdA) gene, partial cds	479	592	0.64	4e-131	0.98	DQ117244.1
Clostridium difficile strain 1599 toxin A (tcdA) gene, partial cds	452	556	0.64	6e-123	0.96	DQ117241.1
Clostridium difficile strain 4984 toxin A (tcdA) gene, partial cds	434	547	0.64	1e-117	0.95	DQ117243.1
Peptoclostridium difficile BJ08, complete genome	374	2251	0.93	1e-99	0.85	CP003939.1
[Clostridium] difficile strain GZ14 truncated toxin A (tcdA) gene, complete cds	374	767	0.63	1e-99	0.85	KC292056.1
Clostridium difficile M68, complete genome	374	4206	0.93	1e-99	0.85	FN668375.1
Clostridium difficile complete genome, strain CF5	374	2654	0.93	1e-99	0.85	FN665652.1
Clostridium difficile enterotoxin A (tcdA) gene, partial cds	374	767	0.63	1e-99	0.85	AF217291.1
C.difficile tcdA gene, CROP repeat region	374	762	0.63	1e-99	0.85	Y12616.1
Clostridium difficile gene for toxin A, partial cds	374	767	0.63	1e-99	0.85	AB012304.1
Clostridium difficile cdtA gene for enterotoxin A, part	298	2251	0.61	8e-77	0.81	X17194.1
[Clostridium] sordellii genome assembly JGS6382, plasmid : pCS1	293	1737	0.64	3e-75	0.8	LN681235.1
Paeniclostridium sordellii strain VPI 9048 TcsH (tcsH) gene, complete cds	293	1737	0.64	3e-75	0.8	KC814176.1
Clostridium difficile PaLoc containing novel insertion between tcdE and tcdA, strain Ox1485	253	646	0.59	3e-63	0.79	HG002394.1
Clostridioides difficile strain Cl-N339 16S ribosomal RNA gene, partial sequence	205	205	0.29	1e-48	0.89	KY523549.1
Peptoclostridium difficile strain Rd2-F90-Cd001 16S ribosomal RNA gene, partial sequence	205	205	0.29	1e-48	0.89	KX109924.1
Peptoclostridium difficile strain Z31, complete genome	205	2050	0.29	1e-48	0.89	CP013196.1
Peptoclostridium difficile genome assembly 7032989, scaffold BN1095_Contig_4	205	205	0.29	1e-48	0.89	LK933071.1
Peptoclostridium difficile genome assembly 7032985, scaffold BN1096_Contig_2	205	205	0.29	1e-48	0.89	LK932469.1
Peptoclostridium difficile genome assembly 7032994, scaffold BN1097_Contig_2	205	205	0.29	1e-48	0.89	LK932354.1
Uncultured organism clone ELU0179-T491-S-NIPCRAMgANa_000244 small subunit ribosomal RNA gene, partial sequence	205	205	0.29	1e-48	0.89	HQ818991.1
Uncultured organism clone ELU0179-T491-S-NIPCRAMgANa_000141 small subunit ribosomal RNA gene, partial sequence	205	205	0.29	1e-48	0.89	HQ818888.1
Uncultured organism clone ELU0179-T491-S-NIPCRAMgANa_000121 small subunit ribosomal RNA gene, partial sequence	205	205	0.29	1e-48	0.89	HQ818868.1
Uncultured organism clone ELU0153-T424-S-NIPCRAMgANa_000471 small subunit ribosomal RNA gene, partial sequence	205	205	0.29	1e-48	0.89	HQ803653.1
Uncultured organism clone ELU0153-T424-S-NIPCRAMgANa_000398 small subunit ribosomal RNA gene, partial sequence	205	205	0.29	1e-48	0.89	HQ803580.1
Uncultured organism clone ELU0096-T30-S-NI_000179 small subunit ribosomal RNA gene, partial sequence	205	205	0.29	1e-48	0.89	HQ783330.1
Uncultured organism clone ELU0096-T30-S-NI_000142 small subunit ribosomal RNA gene, partial sequence	205	205	0.29	1e-48	0.89	HQ783293.1
Uncultured organism clone ELU0063-T430-S-NIPCRAMgANa_000578 small subunit ribosomal RNA gene, partial sequence	205	205	0.29	1e-48	0.89	HQ768766.1
Uncultured organism clone ELU0063-T430-S-NIPCRAMgANa_000409 small subunit ribosomal RNA gene, partial sequence	205	205	0.29	1e-48	0.89	HQ768597.1
Uncultured organism clone ELU0063-T430-S-NIPCRAMgANa_000303 small subunit ribosomal RNA gene, partial sequence	205	205	0.29	1e-48	0.89	HQ768491.1
Uncultured organism clone ELU0063-T430-S-NIPCRAMgANa_000231 small subunit ribosomal RNA gene, partial sequence	205	205	0.29	1e-48	0.89	HQ768419.1
Uncultured organism clone ELU0063-T430-S-NIPCRAMgANa_000082 small subunit ribosomal RNA gene, partial sequence	205	205	0.29	1e-48	0.89	HQ768270.1
Uncultured organism clone ELU0063-T430-S-NIPCRAMgANa_000013 small subunit ribosomal RNA gene, partial sequence	205	205	0.29	1e-48	0.89	HQ768201.1
Uncultured organism clone ELU0021-T97-S-NI_000615 small subunit ribosomal RNA gene, partial sequence	205	205	0.29	1e-48	0.89	HQ747137.1
Uncultured organism clone ELU0021-T97-S-NI_000479 small subunit ribosomal RNA gene, partial sequence	205	205	0.29	1e-48	0.89	HQ747001.1
Uncultured organism clone ELU0013-T78-S-NI_000176 small subunit ribosomal RNA gene, partial sequence	205	205	0.29	1e-48	0.89	HQ742601.1
Uncultured organism clone ELU0013-T78-S-NI_000024 small subunit ribosomal RNA gene, partial sequence	205	205	0.29	1e-48	0.89	HQ742449.1
[Clostridium] difficile gene for 16S ribosomal RNA, partial sequence, strain: JCM 5244	205	205	0.29	1e-48	0.89	AB632375.1
Clostridium difficile strain 35 16S ribosomal RNA gene, partial sequence	205	205	0.29	1e-48	0.89	JF693896.1
Clostridium difficile strain DSM 12056 16S ribosomal RNA gene, partial sequence	205	205	0.29	1e-48	0.89	HM007570.1
Peptoclostridium difficile strain JCM 1296 16S ribosomal RNA gene, partial sequence	205	205	0.29	1e-48	0.89	NR_113132.1
Uncultured Clostridium sp. clone 107 16S ribosomal RNA gene, partial sequence	205	205	0.29	1e-48	0.89	EU723410.1
Uncultured Clostridium sp. clone 50 16S ribosomal RNA gene, partial sequence	205	205	0.29	1e-48	0.89	EU723409.1
Uncultured Clostridium sp. clone 186 16S ribosomal RNA gene, partial sequence	205	205	0.29	1e-48	0.89	EU723408.1
Uncultured Clostridium sp. clone 175 16S ribosomal RNA gene, partial sequence	205	205	0.29	1e-48	0.89	EU723407.1
Uncultured Clostridium sp. clone 39 16S ribosomal RNA gene, partial sequence	205	205	0.29	1e-48	0.89	EU723406.1
Uncultured Clostridium sp. clone 162 16S ribosomal RNA gene, partial sequence	205	205	0.29	1e-48	0.89	EU723405.1
Uncultured Clostridium sp. clone 168 16S ribosomal RNA gene, partial sequence	205	205	0.29	1e-48	0.89	EU723404.1
Uncultured Clostridium sp. clone 111 16S ribosomal RNA gene, partial sequence	205	205	0.29	1e-48	0.89	EU723403.1
Uncultured Clostridium sp. clone 1 16S ribosomal RNA gene, partial sequence	205	205	0.29	1e-48	0.89	EU723402.1
Uncultured bacterium clone YO00075A03 16S ribosomal RNA gene, partial sequence	205	205	0.29	1e-48	0.89	EU197960.1
Uncultured bacterium clone YO00043D04 16S ribosomal RNA gene, partial sequence	205	205	0.29	1e-48	0.89	EU197803.1
Uncultured bacterium clone YO00080B03 16S ribosomal RNA gene, partial sequence	205	205	0.29	1e-48	0.89	EU197727.1
Uncultured bacterium clone YO00080C10 16S ribosomal RNA gene, partial sequence	205	205	0.29	1e-48	0.89	EU197717.1
Uncultured bacterium clone 002-h10 16S ribosomal RNA gene, partial sequence	205	205	0.29	1e-48	0.89	DQ904997.1
Uncultured bacterium inhufecA-22 16S ribosomal RNA gene, partial sequence	205	205	0.29	1e-48	0.89	AY328361.1
Uncultured bacterium clone PrebhufecN25 16S ribosomal RNA gene, partial sequence	205	205	0.29	1e-48	0.89	DQ083709.1
Clostridium difficile strain VPI 10463 16S ribosomal RNA gene, partial sequence	205	205	0.29	1e-48	0.89	AF072473.1
Clostridium difficile strain DSM 1296 16S ribosomal RNA gene, partial sequence	203	203	0.29	5e-48	0.88	HM245939.1
Clostridium difficile strain 38 16S ribosomal RNA gene, partial sequence	203	203	0.29	5e-48	0.88	JF693897.1
Clostridioides difficile strain ZZV15-6598 16S ribosomal RNA gene, partial sequence	201	201	0.29	2e-47	0.88	KX792138.1
Clostridioides difficile strain ZZV15-6597 16S ribosomal RNA gene, partial sequence	201	201	0.29	2e-47	0.88	KX792137.1
Clostridioides difficile strain ZZV14-6388 16S ribosomal RNA gene, partial sequence	201	201	0.29	2e-47	0.88	KX792136.1

## Sheet: A3_AR
Description	Max score	Total score	Query cover	E value	Ident	Accession
Clostridioides difficile strain LEM1, complete genome	540	3073	0.66	1e-149	0.99	CP019469.1
Peptoclostridium difficile strain 08ACD0030, complete genome	540	3073	0.66	1e-149	0.99	CP010888.1
[Clostridium] difficile strain GZ5 toxin A (tcdA) gene, complete cds	540	2274	0.57	1e-149	0.99	KC292058.1
Clostridium difficile strain 428 toxin A (tcdA) gene, partial cds	540	640	0.57	1e-149	0.99	DQ117242.1
Clostridioides difficile strain FDAARGOS_267, complete genome	536	3069	0.66	2e-148	0.99	CP020424.1
Clostridioides difficile strain BR81, complete genome	536	3091	0.66	2e-148	0.99	CP019870.1
Peptoclostridium difficile ATCC 9689 = DSM 1296, complete genome	536	3069	0.66	2e-148	0.99	CP011968.1
[Clostridium] difficile strain VPI10463 toxin A (tcdA) gene, complete cds	536	2295	0.57	2e-148	0.99	KC292122.1
[Clostridium] difficile strain ZR50 toxin A (tcdA) gene, complete cds	536	2270	0.57	2e-148	0.99	KC292116.1
[Clostridium] difficile strain ZR80 toxin A (tcdA) gene, complete cds	536	2308	0.57	2e-148	0.99	KC292092.1
Clostridium difficile ATCC 9689 toxin A (tcdA) gene, complete cds	536	2270	0.57	2e-148	0.99	KC292070.1
[Clostridium] difficile strain ZR81 toxin A (tcdA) gene, complete cds	536	2270	0.57	2e-148	0.99	KC292062.1
[Clostridium] difficile strain GZ1 toxin A (tcdA) gene, complete cds	536	2308	0.57	2e-148	0.99	KC292061.1
Clostridium difficile BI9 chromosome	536	2318	0.66	2e-148	0.99	FN668944.1
Clostridium difficile strain 654519 toxin A (tcdA) gene, partial cds	536	636	0.57	2e-148	0.99	DQ117247.1
C.difficile cdu2, cdu1, tcdD, tcdB, tcdE, tcdA, tcdC, cdd1, cdd2, cdd3, and cdd4 genes	536	2340	0.57	2e-148	0.99	X92982.1
C.difficile toxin A gene, complete cds	536	2295	0.57	2e-148	0.99	M30307.1
Clostridium difficile toxA gene for Toxin A and flanks containing an unidentified reading frame	536	2292	0.57	2e-148	0.99	X51797.1
Clostridioides difficile strain 630 delta erm, complete genome	531	3064	0.66	8e-147	0.98	CP016318.1
Clostridioides difficile 630, complete genome	531	3064	0.66	8e-147	0.98	CP010905.2
Peptoclostridium difficile genome assembly CD630DERM, chromosome : 1	531	3060	0.66	8e-147	0.98	LN614756.1
[Clostridium] difficile strain ZR77 toxin A (tcdA) gene, complete cds	531	2265	0.57	8e-147	0.98	KC292125.1
[Clostridium] difficile strain ZR74 toxin A (tcdA) gene, complete cds	531	2265	0.57	8e-147	0.98	KC292072.1
[Clostridium] difficile strain ZR48 toxin A (tcdA) gene, complete cds	531	2274	0.57	8e-147	0.98	KC292059.1
[Clostridium] difficile strain SH8 toxin A (tcdA) gene, complete cds	531	2265	0.57	8e-147	0.98	KC292057.1
Clostridium difficile 630 complete genome	531	3001	0.66	8e-147	0.98	AM180355.1
Clostridium difficile strain 630 toxin A (tcdA) gene, partial cds	531	631	0.57	8e-147	0.98	DQ117245.1
Clostridium difficile strain 5933 toxin A (tcdA) gene, partial cds	531	636	0.57	8e-147	0.98	DQ117244.1
Clostridium difficile ribotype 01 toxin A (tcdA) gene, partial cds	527	2257	0.57	9e-146	0.98	AY238985.1
[Clostridium] difficile strain UK1 toxin A (tcdA) gene, complete cds	502	2268	0.57	4e-138	0.96	KC292117.1
Clostridium difficile BI1 chromosome, complete sequence	502	3072	0.66	4e-138	0.96	FN668941.1
Clostridium difficile complete genome, strain 2007855	502	2885	0.66	4e-138	0.96	FN665654.1
Clostridium difficile R20291 complete genome	502	2885	0.66	4e-138	0.96	FN545816.1
Clostridium difficile CD196 complete genome, strain CD196	502	2947	0.66	4e-138	0.96	FN538970.1
Clostridium difficile strain 1599 toxin A (tcdA) gene, partial cds	495	606	0.57	5e-136	0.96	DQ117241.1
Peptoclostridium difficile strain ZJCDC-1 disrupted pathogenicity gene locus, partial sequence	491	2399	0.57	7e-135	0.95	KP981374.1
[Clostridium] difficile strain ZR17 toxin A (tcdA) gene, complete cds	491	2347	0.57	7e-135	0.95	KC292104.1
[Clostridium] difficile strain JF09 TcdA (tcdA) gene, complete cds	482	2275	0.57	3e-132	0.95	JQ809335.1
Clostridium difficile complete genome, strain M120	482	3110	0.66	3e-132	0.95	FN665653.1
Clostridium difficile strain 4984 toxin A (tcdA) gene, partial cds	482	597	0.57	3e-132	0.95	DQ117243.1
Peptoclostridium difficile BJ08, complete genome	279	1135	0.66	8e-71	0.83	CP003939.1
[Clostridium] difficile strain GZ14 truncated toxin A (tcdA) gene, complete cds	279	648	0.57	8e-71	0.83	KC292056.1
Clostridium difficile M68, complete genome	279	1695	0.66	8e-71	0.83	FN668375.1
Clostridium difficile complete genome, strain CF5	279	1260	0.66	8e-71	0.83	FN665652.1
Clostridium difficile enterotoxin A (tcdA) gene, partial cds	279	648	0.57	8e-71	0.83	AF217291.1
Clostridium difficile gene for toxin A, partial cds	279	648	0.57	8e-71	0.83	AB012304.1
C.difficile tcdA gene, CROP repeat region	275	632	0.57	9e-70	0.82	Y12616.1
[Clostridium] sordellii genome assembly JGS6382, plasmid : pCS1	264	1470	0.59	2e-66	0.79	LN681235.1
Paeniclostridium sordellii strain VPI 9048 TcsH (tcsH) gene, complete cds	264	1470	0.59	2e-66	0.79	KC814176.1
Clostridium difficile cdtA gene for enterotoxin A, part	241	1880	0.54	2e-59	0.8	X17194.1
Clostridium difficile PaLoc containing novel insertion between tcdE and tcdA, strain Ox1485	194	584	0.56	2e-45	0.77	HG002394.1
Clostridium difficile strain 95600 toxin A (tcdA) gene, partial cds	69.8	123	0.16	7e-08	0.98	DQ117251.1
Okibacterium endophyticum strain SKUAST-K9 16S ribosomal RNA gene, partial sequence	68.0	68.0	0.09	2e-07	0.9	KY611900.1
Uncultured bacterium clone KH-T1-187 16S ribosomal RNA gene, partial sequence	68.0	68.0	0.09	2e-07	0.9	KU929295.1
Brachybacterium muris strain DIB-24 16S ribosomal RNA gene, partial sequence	68.0	68.0	0.08	2e-07	0.91	KX066824.1
Uncultured bacterium clone BWL1030 16S ribosomal RNA gene, partial sequence	68.0	68.0	0.09	2e-07	0.9	KT460235.1
Pseudobutyrivibrio sp. CA16 gene for 16S ribosomal RNA, partial sequence	68.0	68.0	0.07	2e-07	0.95	AB849379.1
Uncultured bacterium clone 8GT0-13 16S ribosomal RNA gene, partial sequence	68.0	68.0	0.09	2e-07	0.9	JX417286.1
Uncultured bacterium clone B7F-91 16S ribosomal RNA gene, partial sequence	68.0	68.0	0.09	2e-07	0.9	JX417275.1
Uncultured bacterium clone B7F-86 16S ribosomal RNA gene, partial sequence	68.0	68.0	0.09	2e-07	0.9	JX417270.1
Uncultured bacterium clone B7F-57 16S ribosomal RNA gene, partial sequence	68.0	68.0	0.09	2e-07	0.9	JX417243.1
Uncultured bacterium clone B7F-54 16S ribosomal RNA gene, partial sequence	68.0	68.0	0.09	2e-07	0.9	JX417240.1
Uncultured bacterium clone B7F-26 16S ribosomal RNA gene, partial sequence	68.0	68.0	0.09	2e-07	0.9	JX417214.1
Uncultured bacterium clone B7F-16 16S ribosomal RNA gene, partial sequence	68.0	68.0	0.09	2e-07	0.9	JX417204.1
Uncultured bacterium clone MAB1_295 16S ribosomal RNA gene, partial sequence	68.0	68.0	0.09	2e-07	0.9	JQ983551.1
Uncultured organism clone ELU0123-T309-S-NI_000120 small subunit ribosomal RNA gene, partial sequence	68.0	68.0	0.09	2e-07	0.9	HQ791108.1
Uncultured organism clone ELU0123-T309-S-NI_000009 small subunit ribosomal RNA gene, partial sequence	68.0	68.0	0.09	2e-07	0.9	HQ790997.1
Uncultured bacterium clone Pohang_WWTP_June.2006_2266 16S ribosomal RNA gene, partial sequence	68.0	68.0	0.1	2e-07	0.86	HQ493117.1
Uncultured bacterium clone VT011-G1 16S ribosomal RNA gene, partial sequence	68.0	68.0	0.09	2e-07	0.9	JF798111.1
Uncultured bacterium gene for 16S rRNA, partial sequence, clone: TPHR-1_E10	68.0	68.0	0.09	2e-07	0.9	AB599131.1
Uncultured bacterium clone ncd2666h10c1 16S ribosomal RNA gene, partial sequence	68.0	68.0	0.09	2e-07	0.9	JF231916.1
Uncultured bacterium clone H75N2_66f11 16S ribosomal RNA gene, partial sequence	68.0	68.0	0.09	2e-07	0.9	EU454290.1
Uncultured bacterium clone denovo20647_557_44559 16S ribosomal RNA gene, partial sequence	66.2	66.2	0.08	9e-07	0.89	MF294795.1
uncultured gamma proteobacterium partial 16S rRNA gene, isolate BACT_OTU_784	66.2	66.2	0.1	9e-07	0.84	LT841790.1
uncultured gamma proteobacterium partial 16S rRNA gene, isolate BACT_OTU_661	66.2	66.2	0.1	9e-07	0.84	LT841834.1
Uncultured bacterium clone denovo6479_560_50873 16S ribosomal RNA gene, partial sequence	66.2	66.2	0.1	9e-07	0.84	MF223950.1
Uncultured bacterium clone denovo34897_565_1308 16S ribosomal RNA gene, partial sequence	66.2	66.2	0.1	9e-07	0.84	MF213292.1
Clostridium merdae strain Marseille-P2953 16S ribosomal RNA, partial sequence	66.2	66.2	0.1	9e-07	0.84	NR_147400.1
Uncultured Peptostreptococcus sp. partial 16S rRNA gene, isolate 441T_16754	66.2	66.2	0.1	9e-07	0.84	LT691337.1
Uncultured prokaryote clone P290 16S ribosomal RNA gene, partial sequence	66.2	66.2	0.08	9e-07	0.89	KY076955.1
Uncultured prokaryote clone P289 16S ribosomal RNA gene, partial sequence	66.2	66.2	0.08	9e-07	0.89	KY076954.1
Uncultured prokaryote clone P288 16S ribosomal RNA gene, partial sequence	66.2	66.2	0.08	9e-07	0.89	KY076953.1
Uncultured prokaryote clone P280 16S ribosomal RNA gene, partial sequence	66.2	66.2	0.08	9e-07	0.89	KY076945.1
Uncultured prokaryote clone P279 16S ribosomal RNA gene, partial sequence	66.2	66.2	0.08	9e-07	0.89	KY076944.1
Uncultured prokaryote clone P278 16S ribosomal RNA gene, partial sequence	66.2	66.2	0.08	9e-07	0.89	KY076943.1
Uncultured prokaryote clone P277 16S ribosomal RNA gene, partial sequence	66.2	66.2	0.08	9e-07	0.89	KY076942.1
Uncultured prokaryote clone P244 16S ribosomal RNA gene, partial sequence	66.2	66.2	0.1	9e-07	0.84	KY076909.1
Uncultured prokaryote clone P240 16S ribosomal RNA gene, partial sequence	66.2	66.2	0.08	9e-07	0.89	KY076905.1
Uncultured prokaryote clone P239 16S ribosomal RNA gene, partial sequence	66.2	66.2	0.08	9e-07	0.89	KY076904.1
Uncultured prokaryote clone P238 16S ribosomal RNA gene, partial sequence	66.2	66.2	0.08	9e-07	0.89	KY076903.1
Uncultured prokaryote clone P237 16S ribosomal RNA gene, partial sequence	66.2	66.2	0.08	9e-07	0.89	KY076902.1
Uncultured bacterium clone EzlYy224 16S ribosomal RNA gene, partial sequence	66.2	66.2	0.1	9e-07	0.84	KX173040.1
Uncultured bacterium clone EzlYy217 16S ribosomal RNA gene, partial sequence	66.2	66.2	0.1	9e-07	0.84	KX173034.1
Uncultured bacterium clone EzlYy199 16S ribosomal RNA gene, partial sequence	66.2	66.2	0.1	9e-07	0.84	KX173016.1
Uncultured bacterium clone EzlYyy46 16S ribosomal RNA gene, partial sequence	66.2	66.2	0.1	9e-07	0.84	KX172950.1
Uncultured bacterium clone EzlYyy11 16S ribosomal RNA gene, partial sequence	66.2	66.2	0.1	9e-07	0.84	KX172782.1
Uncultured bacterium clone EzlYyyy2 16S ribosomal RNA gene, partial sequence	66.2	66.2	0.1	9e-07	0.84	KX172773.1
Uncultured bacterium clone EzyYy120 16S ribosomal RNA gene, partial sequence	66.2	66.2	0.1	9e-07	0.84	KX172410.1
Uncultured marine bacterium clone 155D1Bc4iQ 16S ribosomal RNA gene, partial sequence	66.2	66.2	0.1	9e-07	0.84	KX935578.1
Rhodococcus sp. BRM25 16S ribosomal RNA gene, partial sequence	66.2	66.2	0.08	9e-07	0.91	KP004010.1

## Sheet: A4_AF
Description	Max score	Total score	Query cover	E value	Ident	Accession
[Clostridium] difficile strain UK1 toxin A (tcdA) gene, complete cds	405	2118	0.53	8e-109	0.96	KC292117.1
Clostridium difficile BI1 chromosome, complete sequence	405	3973	0.84	8e-109	0.96	FN668941.1
Clostridium difficile complete genome, strain 2007855	405	3520	0.84	8e-109	0.96	FN665654.1
Clostridium difficile R20291 complete genome	405	3523	0.84	8e-109	0.96	FN545816.1
Clostridium difficile CD196 complete genome, strain CD196	405	3671	0.84	8e-109	0.96	FN538970.1
Clostridioides difficile strain 630 delta erm, complete genome	383	4037	0.84	2e-102	0.94	CP016318.1
Clostridioides difficile strain FDAARGOS_267, complete genome	383	4032	0.84	2e-102	0.94	CP020424.1
Clostridioides difficile strain BR81, complete genome	383	4053	0.84	2e-102	0.94	CP019870.1
Clostridioides difficile 630, complete genome	383	4037	0.84	2e-102	0.94	CP010905.2
Peptoclostridium difficile ATCC 9689 = DSM 1296, complete genome	383	4032	0.84	2e-102	0.94	CP011968.1
Peptoclostridium difficile genome assembly CD630DERM, chromosome : 1	383	4034	0.84	2e-102	0.94	LN614756.1
[Clostridium] difficile strain VPI10463 toxin A (tcdA) gene, complete cds	383	2151	0.53	2e-102	0.94	KC292122.1
[Clostridium] difficile strain ZR50 toxin A (tcdA) gene, complete cds	383	2131	0.53	2e-102	0.94	KC292116.1
[Clostridium] difficile strain ZR80 toxin A (tcdA) gene, complete cds	383	2158	0.53	2e-102	0.94	KC292092.1
[Clostridium] difficile strain ZR74 toxin A (tcdA) gene, complete cds	383	2135	0.53	2e-102	0.94	KC292072.1
Clostridium difficile ATCC 9689 toxin A (tcdA) gene, complete cds	383	2129	0.53	2e-102	0.94	KC292070.1
[Clostridium] difficile strain ZR81 toxin A (tcdA) gene, complete cds	383	2129	0.53	2e-102	0.94	KC292062.1
[Clostridium] difficile strain GZ1 toxin A (tcdA) gene, complete cds	383	2158	0.53	2e-102	0.94	KC292061.1
Clostridium difficile BI9 chromosome	383	2350	0.84	2e-102	0.94	FN668944.1
Clostridium difficile 630 complete genome	383	3886	0.84	2e-102	0.94	AM180355.1
Clostridium difficile ribotype 01 toxin A (tcdA) gene, partial cds	383	2138	0.53	2e-102	0.94	AY238985.1
C.difficile cdu2, cdu1, tcdD, tcdB, tcdE, tcdA, tcdC, cdd1, cdd2, cdd3, and cdd4 genes	383	2238	0.53	2e-102	0.94	X92982.1
C.difficile toxin A gene, complete cds	383	2151	0.53	2e-102	0.94	M30307.1
Clostridium difficile toxA gene for Toxin A and flanks containing an unidentified reading frame	383	2147	0.53	2e-102	0.94	X51797.1
Clostridioides difficile strain LEM1, complete genome	378	4026	0.84	1e-100	0.94	CP019469.1
Peptoclostridium difficile strain 08ACD0030, complete genome	378	4026	0.84	1e-100	0.94	CP010888.1
Peptoclostridium difficile strain ZJCDC-1 disrupted pathogenicity gene locus, partial sequence	378	2242	0.53	1e-100	0.94	KP981374.1
[Clostridium] difficile strain ZR77 toxin A (tcdA) gene, complete cds	378	2120	0.53	1e-100	0.94	KC292125.1
[Clostridium] difficile strain ZR17 toxin A (tcdA) gene, complete cds	378	2140	0.53	1e-100	0.94	KC292104.1
[Clostridium] difficile strain ZR48 toxin A (tcdA) gene, complete cds	378	2127	0.53	1e-100	0.94	KC292059.1
[Clostridium] difficile strain GZ5 toxin A (tcdA) gene, complete cds	378	2124	0.53	1e-100	0.94	KC292058.1
[Clostridium] difficile strain SH8 toxin A (tcdA) gene, complete cds	378	2124	0.53	1e-100	0.94	KC292057.1
[Clostridium] difficile strain JF09 TcdA (tcdA) gene, complete cds	365	2061	0.46	7e-97	0.93	JQ809335.1
Clostridium difficile complete genome, strain M120	365	3745	0.77	7e-97	0.93	FN665653.1
C.difficile tcdA gene, CROP repeat region	311	673	0.45	1e-80	0.93	Y12616.1
Clostridium difficile strain 654519 toxin A (tcdA) gene, partial cds	307	397	0.45	2e-79	0.94	DQ117247.1
Clostridium difficile strain 630 toxin A (tcdA) gene, partial cds	307	402	0.45	2e-79	0.94	DQ117245.1
Clostridium difficile strain 5933 toxin A (tcdA) gene, partial cds	307	402	0.45	2e-79	0.94	DQ117244.1
Peptoclostridium difficile BJ08, complete genome	306	1821	0.76	5e-79	0.93	CP003939.1
[Clostridium] difficile strain GZ14 truncated toxin A (tcdA) gene, complete cds	306	673	0.45	5e-79	0.93	KC292056.1
Clostridium difficile M68, complete genome	306	3322	0.76	5e-79	0.93	FN668375.1
Clostridium difficile complete genome, strain CF5	306	2123	0.76	5e-79	0.93	FN665652.1
Clostridium difficile enterotoxin A (tcdA) gene, partial cds	306	673	0.45	5e-79	0.93	AF217291.1
Clostridium difficile gene for toxin A, partial cds	306	673	0.45	5e-79	0.93	AB012304.1
Clostridium difficile strain 4984 toxin A (tcdA) gene, partial cds	302	397	0.45	7e-78	0.94	DQ117243.1
Clostridium difficile strain 428 toxin A (tcdA) gene, partial cds	302	392	0.45	7e-78	0.94	DQ117242.1
Clostridium difficile strain 1599 toxin A (tcdA) gene, partial cds	298	384	0.45	8e-77	0.93	DQ117241.1
Clostridium difficile cdtA gene for enterotoxin A, part	248	1748	0.37	1e-61	0.88	X17194.1
[Clostridium] sordellii genome assembly JGS6382, plasmid : pCS1	223	1343	0.46	5e-54	0.81	LN681235.1
Paeniclostridium sordellii strain VPI 9048 TcsH (tcsH) gene, complete cds	223	1300	0.46	5e-54	0.81	KC814176.1
Clostridium difficile PaLoc containing novel insertion between tcdE and tcdA, strain Ox1485	203	584	0.37	5e-48	0.83	HG002394.1
Uncultured bacterium clone denovo20275_551_13472 16S ribosomal RNA gene, partial sequence	156	156	0.31	6e-34	0.8	MF300868.1
Uncultured bacterium clone denovo11245_N16_35681 16S ribosomal RNA gene, partial sequence	156	156	0.31	6e-34	0.8	MF230994.1
Uncultured bacterium clone denovo10628_N16_55590 16S ribosomal RNA gene, partial sequence	156	156	0.31	6e-34	0.8	MF230973.1
Uncultured bacterium clone denovo18387_567_38617 16S ribosomal RNA gene, partial sequence	156	156	0.31	6e-34	0.8	MF214364.1
Uncultured bacterium clone denovo25927_572_7278 16S ribosomal RNA gene, partial sequence	156	156	0.31	6e-34	0.8	MF213758.1
Uncultured Clostridium sp. clone BDYFP56 16S ribosomal RNA gene, partial sequence	156	156	0.31	6e-34	0.8	KT002304.1
Uncultured Clostridium sp. clone Bv_11 16S ribosomal RNA gene, partial sequence	156	156	0.31	6e-34	0.8	KM494500.1
Uncultured bacterium clone AAB22 16S ribosomal RNA gene, partial sequence	156	156	0.31	6e-34	0.8	KF427955.1
Uncultured bacterium clone 3N21hH85 16S ribosomal RNA gene, partial sequence	156	156	0.31	6e-34	0.8	KJ853968.1
Uncultured bacterium clone 0N21hL83 16S ribosomal RNA gene, partial sequence	156	156	0.31	6e-34	0.8	KJ853691.1
Uncultured bacterium clone 0N30hL87 16S ribosomal RNA gene, partial sequence	156	156	0.31	6e-34	0.8	KJ853201.1
Uncultured bacterium clone 0N133hL2 16S ribosomal RNA gene, partial sequence	156	156	0.31	6e-34	0.8	KJ852775.1
Uncultured bacterium clone WDol2RectAE10 16S ribosomal RNA gene, partial sequence	156	156	0.31	6e-34	0.8	KC259753.1
Uncultured bacterium clone WDol2RectAA09 16S ribosomal RNA gene, partial sequence	156	156	0.31	6e-34	0.8	KC259715.1
Uncultured bacterium clone DolRc_DL35rect19C09 16S ribosomal RNA gene, partial sequence	156	156	0.31	6e-34	0.8	JQ203050.1
Uncultured Clostridium sp. partial 16S rRNA gene, clone T60	156	156	0.31	6e-34	0.8	HG917219.1
Uncultured bacterium isolate DGGE gel band 3a 16S ribosomal RNA gene, complete sequence	156	156	0.31	6e-34	0.8	KF835363.1
Uncultured Firmicutes bacterium clone 4E-F 16S ribosomal RNA gene, partial sequence	156	156	0.31	6e-34	0.8	JX844003.2
Uncultured bacterium partial 16S rRNA gene, clone 16sms223-3b07	156	156	0.31	6e-34	0.8	HE605809.1
Uncultured soil bacterium clone B157 16S ribosomal RNA gene, partial sequence	156	156	0.31	6e-34	0.8	JX490039.1
Uncultured bacterium clone 16sms228-3f01 16S ribosomal RNA gene, partial sequence	156	156	0.31	6e-34	0.8	JF253204.1
Uncultured bacterium clone 16saw121-3d11 16S ribosomal RNA gene, partial sequence	156	156	0.31	6e-34	0.8	JF245503.1
Uncultured bacterium clone 16saw120-3e12 16S ribosomal RNA gene, partial sequence	156	156	0.31	6e-34	0.8	JF245296.1
Uncultured bacterium clone 16saw108-3b09.w2k 16S ribosomal RNA gene, partial sequence	156	156	0.31	6e-34	0.8	JF242353.1
Uncultured organism clone ELU0120-T301-S-NI_000007 small subunit ribosomal RNA gene, partial sequence	156	156	0.31	6e-34	0.8	HQ790248.1
Uncultured organism clone ELU0054-T358-S-NIPCRAMgANa_000196 small subunit ribosomal RNA gene, partial sequence	156	156	0.31	6e-34	0.8	HQ763483.1
Uncultured organism clone ELU0155-T288-S-NIPCRAMgANa_000767 small subunit ribosomal RNA gene, partial sequence	156	156	0.31	6e-34	0.8	HQ805128.1
Uncultured organism clone ELU0155-T288-S-NIPCRAMgANa_000258 small subunit ribosomal RNA gene, partial sequence	156	156	0.31	6e-34	0.8	HQ804619.1
Uncultured organism clone ELU0145-T222-S-NIPCRAMgANa_000537 small subunit ribosomal RNA gene, partial sequence	156	156	0.31	6e-34	0.8	HQ800440.1
Uncultured organism clone ELU0139-T413-S-NIPCRAMgANa_000201 small subunit ribosomal RNA gene, partial sequence	156	156	0.31	6e-34	0.8	HQ796390.1
Uncultured bacterium clone 02b02 16S ribosomal RNA gene, partial sequence	156	156	0.31	6e-34	0.8	GQ133918.1
Uncultured bacterium clone 03f08 16S ribosomal RNA gene, partial sequence	156	156	0.31	6e-34	0.8	GQ139120.1
Uncultured bacterium clone 04e12 16S ribosomal RNA gene, partial sequence	156	156	0.31	6e-34	0.8	GQ137458.1
Uncultured bacterium clone 254_InIs3-G8 16S ribosomal RNA gene, partial sequence	156	156	0.31	6e-34	0.8	JN883144.1
Uncultured Clostridium sp. clone ABLBc42 16S ribosomal RNA gene, partial sequence	156	156	0.31	6e-34	0.8	JF268954.1
Uncultured bacterium clone H2-plate10_C09 16S ribosomal RNA gene, partial sequence	156	156	0.31	6e-34	0.8	HQ176266.1
Uncultured bacterium clone ncd2649d04c1 16S ribosomal RNA gene, partial sequence	156	156	0.31	6e-34	0.8	JF230898.1
Uncultured bacterium clone ncd1885d06c1 16S ribosomal RNA gene, partial sequence	156	156	0.31	6e-34	0.8	JF162778.1
Uncultured Firmicutes bacterium clone T4-123 16S ribosomal RNA gene, partial sequence	156	156	0.31	6e-34	0.8	GU955099.1
Uncultured bacterium clone 16saw58-3g08.w2k 16S ribosomal RNA gene, partial sequence	156	156	0.31	6e-34	0.8	GQ296540.1
Uncultured bacterium partial 16S rRNA gene, clone MB01D01	156	156	0.31	6e-34	0.8	FM873824.1
Uncultured bacterium clone 9LEM06 16S ribosomal RNA gene, partial sequence	156	156	0.31	6e-34	0.8	FJ163557.1
Uncultured bacterium clone 8LEL05 16S ribosomal RNA gene, partial sequence	156	156	0.31	6e-34	0.8	FJ163465.1
Uncultured bacterium clone 7LED06 16S ribosomal RNA gene, partial sequence	156	156	0.31	6e-34	0.8	FJ163352.1
Uncultured bacterium clone QXJ-21 16S ribosomal RNA gene, partial sequence	154	154	0.31	2e-33	0.8	KJ957717.1
Uncultured bacterium clone BD07607 16S ribosomal RNA gene, partial sequence	154	154	0.31	2e-33	0.8	JQ186152.1
Uncultured bacterium clone 278_OIs2-B10 16S ribosomal RNA gene, partial sequence	154	154	0.31	2e-33	0.8	JN884162.1
Uncultured bacterium clone Ll142-7G12 16S ribosomal RNA gene, partial sequence	154	154	0.31	2e-33	0.8	FJ672766.1
Uncultured bacterium clone 7LEK06 16S ribosomal RNA gene, partial sequence	154	154	0.31	2e-33	0.8	FJ163373.1

## Sheet: A4_AR
Description	Max score	Total score	Query cover	E value	Ident	Accession
Clostridioides difficile strain ZZV15-6598 16S ribosomal RNA gene, partial sequence	212	212	0.34	9e-51	0.85	KX792138.1
Clostridioides difficile strain ZZV15-6597 16S ribosomal RNA gene, partial sequence	212	212	0.34	9e-51	0.85	KX792137.1
Clostridioides difficile strain ZZV14-6388 16S ribosomal RNA gene, partial sequence	212	212	0.34	9e-51	0.85	KX792136.1
Clostridioides difficile strain ZZV14-6167 16S ribosomal RNA gene, partial sequence	212	212	0.34	9e-51	0.85	KX792132.1
Clostridioides difficile strain ZZV14-6154 16S ribosomal RNA gene, partial sequence	212	212	0.34	9e-51	0.85	KX792131.1
Clostridioides difficile strain ZZV14-6153 16S ribosomal RNA gene, partial sequence	212	212	0.34	9e-51	0.85	KX792130.1
Clostridioides difficile strain ZZV14-6150 16S ribosomal RNA gene, partial sequence	212	212	0.34	9e-51	0.85	KX792129.1
Clostridioides difficile strain ZZV14-6048 16S ribosomal RNA gene, partial sequence	212	212	0.34	9e-51	0.85	KX792128.1
Clostridioides difficile strain ZZV14-6045 16S ribosomal RNA gene, partial sequence	212	212	0.34	9e-51	0.85	KX792127.1
Clostridioides difficile strain ZZV14-6044 16S ribosomal RNA gene, partial sequence	212	212	0.34	9e-51	0.85	KX792126.1
Clostridioides difficile strain ZZV14-6009 16S ribosomal RNA gene, partial sequence	212	212	0.34	9e-51	0.85	KX792125.1
Clostridioides difficile strain ZZV14-5902 16S ribosomal RNA gene, partial sequence	212	212	0.34	9e-51	0.85	KX792124.1
Clostridioides difficile strain ZZV13-5731 16S ribosomal RNA gene, partial sequence	212	212	0.34	9e-51	0.85	KX792123.1
Uncultured bacterium gene for 16S ribosomal RNA, partial sequence, clone: 20ZB6	212	212	0.34	9e-51	0.85	AB826033.1
Uncultured organism clone ELU0144-T169-S-IIPCRAMgANa_000309 small subunit ribosomal RNA gene, partial sequence	212	212	0.34	9e-51	0.85	HQ799626.1
Uncultured organism clone ELU0096-T30-S-NI_000179 small subunit ribosomal RNA gene, partial sequence	212	212	0.34	9e-51	0.85	HQ783330.1
Uncultured bacterium clone JMG04C 16S ribosomal RNA gene, partial sequence	212	212	0.34	9e-51	0.85	JF692485.1
Clostridium glycolicum strain ZR-1 16S ribosomal RNA gene, partial sequence	212	212	0.34	9e-51	0.85	GU951435.1
Uncultured bacterium clone M07_18 16S ribosomal RNA gene, partial sequence	212	212	0.34	9e-51	0.85	FJ162346.1
Uncultured bacterium clone LI2_aae50f06 16S ribosomal RNA gene, partial sequence	212	212	0.34	9e-51	0.85	EU776602.1
Uncultured bacterium clone BARB_aaa02b09 16S ribosomal RNA gene, partial sequence	212	212	0.34	9e-51	0.85	EU475627.1
Uncultured bacterium clone denovo6554_N12_31806 16S ribosomal RNA gene, partial sequence	206	206	0.34	4e-49	0.85	MF267224.1
Uncultured bacterium clone denovo53566_N12_61057 16S ribosomal RNA gene, partial sequence	206	206	0.34	4e-49	0.85	MF265717.1
Uncultured bacterium clone denovo50483_N12_103396 16S ribosomal RNA gene, partial sequence	206	206	0.34	4e-49	0.85	MF265373.1
Uncultured bacterium clone denovo24671_N12_24641 16S ribosomal RNA gene, partial sequence	206	206	0.34	4e-49	0.85	MF262129.1
Uncultured bacterium clone denovo65215_N16_8641 16S ribosomal RNA gene, partial sequence	206	206	0.34	4e-49	0.85	MF233215.1
Uncultured bacterium clone denovo54590_N16_94146 16S ribosomal RNA gene, partial sequence	206	206	0.34	4e-49	0.85	MF232750.1
Uncultured bacterium clone denovo21834_N16_35643 16S ribosomal RNA gene, partial sequence	206	206	0.34	4e-49	0.85	MF231454.1
Uncultured bacterium clone denovo2010_N16_5668 16S ribosomal RNA gene, partial sequence	206	206	0.34	4e-49	0.85	MF231377.1
Uncultured bacterium clone denovo25160_572_1018 16S ribosomal RNA gene, partial sequence	206	206	0.34	4e-49	0.85	MF213746.1
Clostridioides difficile strain 630 delta erm, complete genome	206	2591	0.41	4e-49	0.85	CP016318.1
Clostridioides difficile strain FDAARGOS_267, complete genome	206	2591	0.41	4e-49	0.85	CP020424.1
Clostridioides difficile strain BR81, complete genome	206	2591	0.41	4e-49	0.85	CP019870.1
Clostridioides difficile strain Cl-N339 16S ribosomal RNA gene, partial sequence	206	206	0.34	4e-49	0.85	KY523549.1
Clostridioides difficile strain LEM1, complete genome	206	2591	0.41	4e-49	0.85	CP019469.1
Terrisporobacter glycolicus gene for 16S ribosomal RNA, partial sequence, clone: J30-5	206	206	0.34	4e-49	0.85	LC194923.1
Uncultured bacterium clone ExkYy116 16S ribosomal RNA gene, partial sequence	206	206	0.34	4e-49	0.85	KX173228.1
Clostridioides difficile 630, complete genome	206	2591	0.41	4e-49	0.85	CP010905.2
Clostridioides difficile strain ZZV14-6387 16S ribosomal RNA gene, partial sequence	206	206	0.34	4e-49	0.85	KX792135.1
Clostridioides difficile strain ZZV14-6383 16S ribosomal RNA gene, partial sequence	206	206	0.34	4e-49	0.85	KX792134.1
Clostridioides difficile strain ZZV14-6345 16S ribosomal RNA gene, partial sequence	206	206	0.34	4e-49	0.85	KX792133.1
Uncultured bacterium clone HomPi_190 16S ribosomal RNA gene, partial sequence	206	206	0.34	4e-49	0.85	KU705899.1
Clostridium sp. strain AR 16S ribosomal RNA gene, partial sequence	206	206	0.34	4e-49	0.85	KU664656.1
Clostridium sp. Cu-R3 16S ribosomal RNA gene, partial sequence	206	206	0.34	4e-49	0.85	KU587046.1
Terrisporobacter petrolearius strain LAM0A37 16S ribosomal RNA, partial sequence	206	206	0.34	4e-49	0.85	NR_137408.1
Peptoclostridium difficile strain Rd2-F90-Cd001 16S ribosomal RNA gene, partial sequence	206	206	0.34	4e-49	0.85	KX109924.1
Terrisporobacter mayombei strain HAWD5 16S ribosomal RNA gene, partial sequence	206	206	0.34	4e-49	0.85	KU886102.1
Uncultured bacterium clone ZX2_B01 16S ribosomal RNA gene, partial sequence	206	206	0.34	4e-49	0.85	KT952873.1
Bacterium 8(2016) 16S ribosomal RNA gene, partial sequence	206	206	0.34	4e-49	0.85	KT889283.1
Bacterium 3(2016) 16S ribosomal RNA gene, partial sequence	206	206	0.34	4e-49	0.85	KT889278.1
Peptoclostridium difficile strain 08ACD0030, complete genome	206	2591	0.41	4e-49	0.85	CP010888.1
Terrisporobacter sp. CCK3R4-PYG-107 16S ribosomal RNA gene, partial sequence	206	206	0.34	4e-49	0.85	KR364793.1
Clostridioides mangenotii strain G10-CCK1R4-PYG-100 16S ribosomal RNA gene, partial sequence	206	206	0.34	4e-49	0.85	KR364752.1
[Clostridium] mangenotii strain MCM B567 16S ribosomal RNA gene, partial sequence	206	206	0.34	4e-49	0.85	KT633849.1
[Clostridium] mangenotii strain MCM B561 16S ribosomal RNA gene, partial sequence	206	206	0.34	4e-49	0.85	KT624606.1
[Clostridium] mangenotii strain MCM B 559 16S ribosomal RNA gene, partial sequence	206	206	0.34	4e-49	0.85	KT624605.1
Terrisporobacter glycolicus partial 16S rRNA gene, strain mammoth-9	206	206	0.34	4e-49	0.85	LN998075.1
Terrisporobacter mayombei strain TM5 16S ribosomal RNA gene, partial sequence	206	206	0.34	4e-49	0.85	KP754684.1
Terrisporobacter mayombei strain TM4 16S ribosomal RNA gene, partial sequence	206	206	0.34	4e-49	0.85	KP754683.1
Bacterium enrichment culture isolate B1-14 16S ribosomal RNA gene, partial sequence	206	206	0.34	4e-49	0.85	KU319390.1
Uncultured bacterium clone HBR-6 16S ribosomal RNA gene, partial sequence	206	206	0.34	4e-49	0.85	KT225503.1
Uncultured Clostridium sp. clone BDYFP33 16S ribosomal RNA gene, partial sequence	206	206	0.34	4e-49	0.85	KT002281.1
Uncultured bacterium isolate DGGE gel band RB2-88 16S ribosomal RNA gene, partial sequence	206	206	0.34	4e-49	0.85	KT835594.1
Uncultured bacterium isolate DGGE gel band RB1-19 16S ribosomal RNA gene, partial sequence	206	206	0.34	4e-49	0.85	KT835489.1
Uncultured bacterium isolate DGGE gel band RA2-18 16S ribosomal RNA gene, partial sequence	206	206	0.34	4e-49	0.85	KT834717.1
Clostridium sp. F207 16S ribosomal RNA gene, partial sequence	206	206	0.34	4e-49	0.85	KT361115.1
Clostridium sp. E164 16S ribosomal RNA gene, partial sequence	206	206	0.34	4e-49	0.85	KT361107.1
Peptoclostridium difficile ATCC 9689 = DSM 1296, complete genome	206	2591	0.41	4e-49	0.85	CP011968.1
Peptoclostridium difficile BJ08, complete genome	206	1510	0.41	4e-49	0.85	CP003939.1
Uncultured Clostridium sp. clone lag_21 16S ribosomal RNA gene, partial sequence	206	206	0.34	4e-49	0.85	KM494516.1
Uncultured Clostridium sp. clone lag_33 16S ribosomal RNA gene, partial sequence	206	206	0.34	4e-49	0.85	KM494509.1
Terrisporobacter glycolicus gene for 16S ribosomal RNA, partial sequence, strain: JCM 1401	206	206	0.34	4e-49	0.85	LC036317.1
Terrisporobacter petrolearius strain LAM0A37 16S ribosomal RNA gene, partial sequence	206	206	0.34	4e-49	0.85	KJ000015.2
Peptoclostridium difficile genome assembly CD630DERM, chromosome : 1	206	2587	0.41	4e-49	0.85	LN614756.1
[Clostridium] mangenotii gene for 16S ribosomal RNA, partial sequence, strain: JCM 1428	206	206	0.34	4e-49	0.85	LC007110.1
Uncultured Clostridium sp. clone FecIF52 16S ribosomal RNA gene, partial sequence	206	206	0.34	4e-49	0.85	KM244907.1
Uncultured bacterium clone 7N186hL34 16S ribosomal RNA gene, partial sequence	206	206	0.34	4e-49	0.85	KJ854024.1
Uncultured bacterium clone 7N186hL23 16S ribosomal RNA gene, partial sequence	206	206	0.34	4e-49	0.85	KJ854015.1
Uncultured bacterium clone 3N21hH89 16S ribosomal RNA gene, partial sequence	206	206	0.34	4e-49	0.85	KJ853971.1
Uncultured bacterium clone 3N21hL125 16S ribosomal RNA gene, partial sequence	206	206	0.34	4e-49	0.85	KJ853891.1
Uncultured bacterium clone 3N21hL79 16S ribosomal RNA gene, partial sequence	206	206	0.34	4e-49	0.85	KJ853857.1
Uncultured bacterium clone 3N21hL75 16S ribosomal RNA gene, partial sequence	206	206	0.34	4e-49	0.85	KJ853853.1
Uncultured bacterium clone 3N21hL73 16S ribosomal RNA gene, partial sequence	206	206	0.34	4e-49	0.85	KJ853852.1
Uncultured bacterium clone 0N21hH114 16S ribosomal RNA gene, partial sequence	206	206	0.34	4e-49	0.85	KJ853801.1
Uncultured bacterium clone 0N21hH102 16S ribosomal RNA gene, partial sequence	206	206	0.34	4e-49	0.85	KJ853792.1
Uncultured bacterium clone 0N21hH53 16S ribosomal RNA gene, partial sequence	206	206	0.34	4e-49	0.85	KJ853757.1
Uncultured bacterium clone 0N21hH5 16S ribosomal RNA gene, partial sequence	206	206	0.34	4e-49	0.85	KJ853725.1
Uncultured bacterium clone 0N21hL70 16S ribosomal RNA gene, partial sequence	206	206	0.34	4e-49	0.85	KJ853682.1
Uncultured bacterium clone 0N21hL50 16S ribosomal RNA gene, partial sequence	206	206	0.34	4e-49	0.85	KJ853667.1
Uncultured bacterium clone 0N21hL49 16S ribosomal RNA gene, partial sequence	206	206	0.34	4e-49	0.85	KJ853666.1
Uncultured bacterium clone 0N21hL18 16S ribosomal RNA gene, partial sequence	206	206	0.34	4e-49	0.85	KJ853646.1
Uncultured bacterium clone 0N21hL15 16S ribosomal RNA gene, partial sequence	206	206	0.34	4e-49	0.85	KJ853644.1
Uncultured bacterium clone 7N227hH97 16S ribosomal RNA gene, partial sequence	206	206	0.34	4e-49	0.85	KJ853620.1
Uncultured bacterium clone 7N227hL25 16S ribosomal RNA gene, partial sequence	206	206	0.34	4e-49	0.85	KJ853489.1
Uncultured bacterium clone 7N227hL14 16S ribosomal RNA gene, partial sequence	206	206	0.34	4e-49	0.85	KJ853480.1
Uncultured bacterium clone 3N56hL92 16S ribosomal RNA gene, partial sequence	206	206	0.34	4e-49	0.85	KJ853361.1
Uncultured bacterium clone 0N30hH36 16S ribosomal RNA gene, partial sequence	206	206	0.34	4e-49	0.85	KJ853249.1
Uncultured bacterium clone 0N30hH25 16S ribosomal RNA gene, partial sequence	206	206	0.34	4e-49	0.85	KJ853241.1
Uncultured bacterium clone 0N30hL65 16S ribosomal RNA gene, partial sequence	206	206	0.34	4e-49	0.85	KJ853187.1
Uncultured bacterium clone 3N201hH140 16S ribosomal RNA gene, partial sequence	206	206	0.34	4e-49	0.85	KJ853113.1

## Sheet: A5_AF
Description	Max score	Total score	Query cover	E value	Ident	Accession
[Clostridium] difficile strain UK1 toxin A (tcdA) gene, complete cds	553	2657	0.59	2e-153	0.98	KC292117.1
Clostridium difficile BI1 chromosome, complete sequence	553	5578	0.9	2e-153	0.98	FN668941.1
Clostridium difficile complete genome, strain 2007855	553	4860	0.9	2e-153	0.98	FN665654.1
Clostridium difficile R20291 complete genome	553	4863	0.9	2e-153	0.98	FN545816.1
Clostridium difficile CD196 complete genome, strain CD196	553	5099	0.9	2e-153	0.98	FN538970.1
Clostridioides difficile strain FDAARGOS_267, complete genome	526	5606	0.9	3e-145	0.97	CP020424.1
Clostridioides difficile strain BR81, complete genome	526	5630	0.9	3e-145	0.97	CP019870.1
Peptoclostridium difficile ATCC 9689 = DSM 1296, complete genome	526	5606	0.9	3e-145	0.97	CP011968.1
[Clostridium] difficile strain VPI10463 toxin A (tcdA) gene, complete cds	526	2660	0.59	3e-145	0.97	KC292122.1
[Clostridium] difficile strain ZR50 toxin A (tcdA) gene, complete cds	526	2636	0.59	3e-145	0.97	KC292116.1
[Clostridium] difficile strain ZR80 toxin A (tcdA) gene, complete cds	526	2669	0.59	3e-145	0.97	KC292092.1
Clostridium difficile ATCC 9689 toxin A (tcdA) gene, complete cds	526	2636	0.59	3e-145	0.97	KC292070.1
[Clostridium] difficile strain ZR81 toxin A (tcdA) gene, complete cds	526	2636	0.59	3e-145	0.97	KC292062.1
[Clostridium] difficile strain GZ1 toxin A (tcdA) gene, complete cds	526	2669	0.59	3e-145	0.97	KC292061.1
Clostridium difficile BI9 chromosome	526	2918	0.9	3e-145	0.97	FN668944.1
C.difficile cdu2, cdu1, tcdD, tcdB, tcdE, tcdA, tcdC, cdd1, cdd2, cdd3, and cdd4 genes	526	2708	0.59	3e-145	0.97	X92982.1
C.difficile toxin A gene, complete cds	526	2660	0.59	3e-145	0.97	M30307.1
Clostridium difficile toxA gene for Toxin A and flanks containing an unidentified reading frame	526	2610	0.59	3e-145	0.97	X51797.1
Clostridioides difficile strain 630 delta erm, complete genome	522	5606	0.9	4e-144	0.96	CP016318.1
Clostridioides difficile strain LEM1, complete genome	522	5603	0.9	4e-144	0.96	CP019469.1
Clostridioides difficile 630, complete genome	522	5606	0.9	4e-144	0.96	CP010905.2
Peptoclostridium difficile strain 08ACD0030, complete genome	522	5603	0.9	4e-144	0.96	CP010888.1
Peptoclostridium difficile strain ZJCDC-1 disrupted pathogenicity gene locus, partial sequence	522	2813	0.59	4e-144	0.96	KP981374.1
Peptoclostridium difficile genome assembly CD630DERM, chromosome : 1	522	5603	0.9	4e-144	0.96	LN614756.1
[Clostridium] difficile strain ZR77 toxin A (tcdA) gene, complete cds	522	2629	0.59	4e-144	0.96	KC292125.1
[Clostridium] difficile strain ZR17 toxin A (tcdA) gene, complete cds	522	2704	0.59	4e-144	0.96	KC292104.1
[Clostridium] difficile strain ZR74 toxin A (tcdA) gene, complete cds	522	2636	0.59	4e-144	0.96	KC292072.1
[Clostridium] difficile strain ZR48 toxin A (tcdA) gene, complete cds	522	2638	0.59	4e-144	0.96	KC292059.1
[Clostridium] difficile strain GZ5 toxin A (tcdA) gene, complete cds	522	2633	0.59	4e-144	0.96	KC292058.1
[Clostridium] difficile strain SH8 toxin A (tcdA) gene, complete cds	522	2633	0.59	4e-144	0.96	KC292057.1
Clostridium difficile 630 complete genome	522	5367	0.9	4e-144	0.96	AM180355.1
Clostridium difficile ribotype 01 toxin A (tcdA) gene, partial cds	517	2631	0.59	2e-142	0.96	AY238985.1
[Clostridium] difficile strain JF09 TcdA (tcdA) gene, complete cds	486	2598	0.59	3e-133	0.94	JQ809335.1
Clostridium difficile complete genome, strain M120	486	5385	0.9	3e-133	0.94	FN665653.1
Clostridium difficile strain 654519 toxin A (tcdA) gene, partial cds	462	559	0.59	3e-126	0.96	DQ117247.1
Clostridium difficile strain 5933 toxin A (tcdA) gene, partial cds	462	565	0.59	3e-126	0.96	DQ117244.1
Clostridium difficile strain 1599 toxin A (tcdA) gene, partial cds	457	550	0.59	1e-124	0.96	DQ117241.1
Clostridium difficile strain 630 toxin A (tcdA) gene, partial cds	457	559	0.59	1e-124	0.96	DQ117245.1
Clostridium difficile strain 428 toxin A (tcdA) gene, partial cds	457	554	0.59	1e-124	0.96	DQ117242.1
Clostridium difficile strain 4984 toxin A (tcdA) gene, partial cds	435	538	0.59	4e-118	0.94	DQ117243.1
C.difficile tcdA gene, CROP repeat region	367	745	0.59	2e-97	0.85	Y12616.1
Peptoclostridium difficile BJ08, complete genome	363	2521	0.9	2e-96	0.85	CP003939.1
[Clostridium] difficile strain GZ14 truncated toxin A (tcdA) gene, complete cds	363	747	0.59	2e-96	0.85	KC292056.1
Clostridium difficile M68, complete genome	363	4896	0.9	2e-96	0.85	FN668375.1
Clostridium difficile complete genome, strain CF5	363	2999	0.9	2e-96	0.85	FN665652.1
Clostridium difficile enterotoxin A (tcdA) gene, partial cds	363	747	0.59	2e-96	0.85	AF217291.1
Clostridium difficile gene for toxin A, partial cds	363	747	0.59	2e-96	0.85	AB012304.1
Clostridium difficile cdtA gene for enterotoxin A, part	309	2208	0.59	4e-80	0.81	X17194.1
[Clostridium] sordellii genome assembly JGS6382, plasmid : pCS1	293	1550	0.62	3e-75	0.81	LN681235.1
Paeniclostridium sordellii strain VPI 9048 TcsH (tcsH) gene, complete cds	293	1500	0.62	3e-75	0.81	KC814176.1
Clostridium difficile PaLoc containing novel insertion between tcdE and tcdA, strain Ox1485	246	697	0.59	4e-61	0.78	HG002394.1
Uncultured bacterium partial 16S rRNA gene, clone 16sms223-3b07	244	244	0.3	2e-60	0.93	HE605809.1
Uncultured organism clone ELU0153-T424-S-NIPCRAMgANa_000471 small subunit ribosomal RNA gene, partial sequence	244	244	0.3	2e-60	0.93	HQ803653.1
Uncultured bacterium clone 7LED06 16S ribosomal RNA gene, partial sequence	244	244	0.3	2e-60	0.93	FJ163352.1
Uncultured bacterium clone 7LED03 16S ribosomal RNA gene, partial sequence	244	244	0.3	2e-60	0.93	FJ163349.1
Uncultured bacterium clone M1251 16S ribosomal RNA gene, partial sequence	244	244	0.3	2e-60	0.93	FJ162780.1
Uncultured bacterium clone denovo6554_N12_31806 16S ribosomal RNA gene, partial sequence	239	239	0.3	7e-59	0.93	MF267224.1
Uncultured bacterium clone denovo53566_N12_61057 16S ribosomal RNA gene, partial sequence	239	239	0.3	7e-59	0.93	MF265717.1
Uncultured bacterium clone denovo50483_N12_103396 16S ribosomal RNA gene, partial sequence	239	239	0.3	7e-59	0.93	MF265373.1
Uncultured bacterium clone denovo24671_N12_24641 16S ribosomal RNA gene, partial sequence	239	239	0.3	7e-59	0.93	MF262129.1
Uncultured bacterium clone denovo65215_N16_8641 16S ribosomal RNA gene, partial sequence	239	239	0.3	7e-59	0.93	MF233215.1
Uncultured bacterium clone denovo58583_N16_63187 16S ribosomal RNA gene, partial sequence	239	239	0.3	7e-59	0.93	MF232917.1
Uncultured bacterium clone denovo57796_N16_76006 16S ribosomal RNA gene, partial sequence	239	239	0.3	7e-59	0.93	MF232879.1
Uncultured bacterium clone denovo54590_N16_94146 16S ribosomal RNA gene, partial sequence	239	239	0.3	7e-59	0.93	MF232750.1
Uncultured bacterium clone denovo21834_N16_35643 16S ribosomal RNA gene, partial sequence	239	239	0.3	7e-59	0.93	MF231454.1
Uncultured bacterium clone denovo20946_N16_54260 16S ribosomal RNA gene, partial sequence	239	239	0.3	7e-59	0.93	MF231419.1
Uncultured bacterium clone denovo2010_N16_5668 16S ribosomal RNA gene, partial sequence	239	239	0.3	7e-59	0.93	MF231377.1
Uncultured bacterium clone denovo25842_567_396 16S ribosomal RNA gene, partial sequence	239	239	0.3	7e-59	0.93	MF214644.1
Uncultured bacterium clone denovo22596_567_28195 16S ribosomal RNA gene, partial sequence	239	239	0.3	7e-59	0.93	MF214518.1
Uncultured bacterium clone denovo17374_567_15607 16S ribosomal RNA gene, partial sequence	239	239	0.3	7e-59	0.93	MF214318.1
Clostridioides difficile strain Cl-N339 16S ribosomal RNA gene, partial sequence	239	239	0.3	7e-59	0.93	KY523549.1
Terrisporobacter glycolicus gene for 16S ribosomal RNA, partial sequence, clone: J30-5	239	239	0.3	7e-59	0.93	LC194923.1
Clostridioides difficile strain ZZV15-6598 16S ribosomal RNA gene, partial sequence	239	239	0.3	7e-59	0.93	KX792138.1
Clostridioides difficile strain ZZV15-6597 16S ribosomal RNA gene, partial sequence	239	239	0.3	7e-59	0.93	KX792137.1
Clostridioides difficile strain ZZV14-6388 16S ribosomal RNA gene, partial sequence	239	239	0.3	7e-59	0.93	KX792136.1
Clostridioides difficile strain ZZV14-6387 16S ribosomal RNA gene, partial sequence	239	239	0.3	7e-59	0.93	KX792135.1
Clostridioides difficile strain ZZV14-6383 16S ribosomal RNA gene, partial sequence	239	239	0.3	7e-59	0.93	KX792134.1
Clostridioides difficile strain ZZV14-6345 16S ribosomal RNA gene, partial sequence	239	239	0.3	7e-59	0.93	KX792133.1
Clostridioides difficile strain ZZV14-6167 16S ribosomal RNA gene, partial sequence	239	239	0.3	7e-59	0.93	KX792132.1
Clostridioides difficile strain ZZV14-6154 16S ribosomal RNA gene, partial sequence	239	239	0.3	7e-59	0.93	KX792131.1
Clostridioides difficile strain ZZV14-6153 16S ribosomal RNA gene, partial sequence	239	239	0.3	7e-59	0.93	KX792130.1
Clostridioides difficile strain ZZV14-6150 16S ribosomal RNA gene, partial sequence	239	239	0.3	7e-59	0.93	KX792129.1
Clostridioides difficile strain ZZV14-6048 16S ribosomal RNA gene, partial sequence	239	239	0.3	7e-59	0.93	KX792128.1
Clostridioides difficile strain ZZV14-6045 16S ribosomal RNA gene, partial sequence	239	239	0.3	7e-59	0.93	KX792127.1
Clostridioides difficile strain ZZV14-6044 16S ribosomal RNA gene, partial sequence	239	239	0.3	7e-59	0.93	KX792126.1
Clostridioides difficile strain ZZV14-6009 16S ribosomal RNA gene, partial sequence	239	239	0.3	7e-59	0.93	KX792125.1
Clostridioides difficile strain ZZV14-5902 16S ribosomal RNA gene, partial sequence	239	239	0.3	7e-59	0.93	KX792124.1
Clostridioides difficile strain ZZV13-5731 16S ribosomal RNA gene, partial sequence	239	239	0.3	7e-59	0.93	KX792123.1
Uncultured bacterium clone HomPi_190 16S ribosomal RNA gene, partial sequence	239	239	0.3	7e-59	0.93	KU705899.1
Terrisporobacter petrolearius strain LAM0A37 16S ribosomal RNA, partial sequence	239	239	0.3	7e-59	0.93	NR_137408.1
Peptoclostridium difficile strain Rd2-F90-Cd001 16S ribosomal RNA gene, partial sequence	239	239	0.3	7e-59	0.93	KX109924.1
Uncultured Clostridium sp. clone Z3C13_14BAC14 16S ribosomal RNA gene, partial sequence	239	239	0.3	7e-59	0.93	KX063330.1
Uncultured Clostridium sp. clone Z3KBAC22 16S ribosomal RNA gene, partial sequence	239	239	0.3	7e-59	0.93	KX063201.1
Terrisporobacter mayombei strain HAWD5 16S ribosomal RNA gene, partial sequence	239	239	0.3	7e-59	0.93	KU886102.1
Uncultured bacterium clone ZX2_B01 16S ribosomal RNA gene, partial sequence	239	239	0.3	7e-59	0.93	KT952873.1
Bacterium 3(2016) 16S ribosomal RNA gene, partial sequence	239	239	0.3	7e-59	0.93	KT889278.1
Terrisporobacter sp. CCK3R4-PYG-107 16S ribosomal RNA gene, partial sequence	239	239	0.3	7e-59	0.93	KR364793.1
Terrisporobacter glycolicus partial 16S rRNA gene, strain mammoth-9	239	239	0.3	7e-59	0.93	LN998075.1
Terrisporobacter mayombei strain TM5 16S ribosomal RNA gene, partial sequence	239	239	0.3	7e-59	0.93	KP754684.1
Terrisporobacter mayombei strain TM4 16S ribosomal RNA gene, partial sequence	239	239	0.3	7e-59	0.93	KP754683.1

## Sheet: A5_AR
Description	Max score	Total score	Query cover	E value	Ident	Accession
[Clostridium] difficile strain UK1 toxin A (tcdA) gene, complete cds	621	1297	0.7	5e-174	1	KC292117.1
Clostridium difficile BI1 chromosome, complete sequence	621	1297	0.7	5e-174	1	FN668941.1
Clostridium difficile complete genome, strain 2007855	621	1297	0.7	5e-174	1	FN665654.1
Clostridium difficile R20291 complete genome	621	1297	0.7	5e-174	1	FN545816.1
Clostridium difficile CD196 complete genome, strain CD196	621	1297	0.7	5e-174	1	FN538970.1
Clostridium difficile strain 1599 toxin A (tcdA) gene, partial cds	579	579	0.69	3e-161	0.98	DQ117241.1
Clostridioides difficile strain FDAARGOS_267, complete genome	577	1297	0.7	1e-160	0.98	CP020424.1
Clostridioides difficile strain BR81, complete genome	577	1324	0.7	1e-160	0.98	CP019870.1
Peptoclostridium difficile ATCC 9689 = DSM 1296, complete genome	577	1297	0.7	1e-160	0.98	CP011968.1
[Clostridium] difficile strain VPI10463 toxin A (tcdA) gene, complete cds	577	1324	0.7	1e-160	0.98	KC292122.1
[Clostridium] difficile strain ZR50 toxin A (tcdA) gene, complete cds	577	1291	0.7	1e-160	0.98	KC292116.1
[Clostridium] difficile strain ZR80 toxin A (tcdA) gene, complete cds	577	1324	0.7	1e-160	0.98	KC292092.1
Clostridium difficile ATCC 9689 toxin A (tcdA) gene, complete cds	577	1297	0.7	1e-160	0.98	KC292070.1
[Clostridium] difficile strain ZR81 toxin A (tcdA) gene, complete cds	577	1297	0.7	1e-160	0.98	KC292062.1
[Clostridium] difficile strain GZ1 toxin A (tcdA) gene, complete cds	577	1324	0.7	1e-160	0.98	KC292061.1
Clostridium difficile BI9 chromosome	577	1269	0.7	1e-160	0.98	FN668944.1
C.difficile cdu2, cdu1, tcdD, tcdB, tcdE, tcdA, tcdC, cdd1, cdd2, cdd3, and cdd4 genes	577	1324	0.7	1e-160	0.98	X92982.1
C.difficile toxin A gene, complete cds	577	1324	0.7	1e-160	0.98	M30307.1
Clostridium difficile toxA gene for Toxin A and flanks containing an unidentified reading frame	577	1324	0.7	1e-160	0.98	X51797.1
Clostridium difficile strain 5933 toxin A (tcdA) gene, partial cds	573	573	0.69	1e-159	0.98	DQ117244.1
Clostridioides difficile strain 630 delta erm, complete genome	571	1297	0.7	5e-159	0.97	CP016318.1
Clostridioides difficile strain LEM1, complete genome	571	1291	0.7	5e-159	0.97	CP019469.1
Clostridioides difficile 630, complete genome	571	1297	0.7	5e-159	0.97	CP010905.2
Peptoclostridium difficile strain 08ACD0030, complete genome	571	1291	0.7	5e-159	0.97	CP010888.1
Peptoclostridium difficile strain ZJCDC-1 disrupted pathogenicity gene locus, partial sequence	571	1269	0.7	5e-159	0.97	KP981374.1
Peptoclostridium difficile genome assembly CD630DERM, chromosome : 1	571	1297	0.7	5e-159	0.97	LN614756.1
[Clostridium] difficile strain ZR77 toxin A (tcdA) gene, complete cds	571	1291	0.7	5e-159	0.97	KC292125.1
[Clostridium] difficile strain ZR17 toxin A (tcdA) gene, complete cds	571	1263	0.7	5e-159	0.97	KC292104.1
[Clostridium] difficile strain ZR74 toxin A (tcdA) gene, complete cds	571	1297	0.7	5e-159	0.97	KC292072.1
[Clostridium] difficile strain ZR48 toxin A (tcdA) gene, complete cds	571	1291	0.7	5e-159	0.97	KC292059.1
[Clostridium] difficile strain GZ5 toxin A (tcdA) gene, complete cds	571	1291	0.7	5e-159	0.97	KC292058.1
[Clostridium] difficile strain SH8 toxin A (tcdA) gene, complete cds	571	1291	0.7	5e-159	0.97	KC292057.1
Clostridium difficile 630 complete genome	571	1297	0.7	5e-159	0.97	AM180355.1
Clostridium difficile ribotype 01 toxin A (tcdA) gene, partial cds	571	1297	0.7	5e-159	0.97	AY238985.1
Clostridium difficile strain 654519 toxin A (tcdA) gene, partial cds	568	568	0.69	7e-158	0.98	DQ117247.1
Clostridium difficile strain 630 toxin A (tcdA) gene, partial cds	562	562	0.69	3e-156	0.97	DQ117245.1
Clostridium difficile strain 428 toxin A (tcdA) gene, partial cds	562	562	0.69	3e-156	0.97	DQ117242.1
[Clostridium] difficile strain JF09 TcdA (tcdA) gene, complete cds	549	1265	0.7	2e-152	0.96	JQ809335.1
Clostridium difficile complete genome, strain M120	549	1322	0.7	2e-152	0.96	FN665653.1
Clostridium difficile strain 4984 toxin A (tcdA) gene, partial cds	540	540	0.69	1e-149	0.96	DQ117243.1
Peptoclostridium difficile BJ08, complete genome	300	432	0.7	3e-77	0.86	CP003939.1
[Clostridium] difficile strain GZ14 truncated toxin A (tcdA) gene, complete cds	300	432	0.7	3e-77	0.86	KC292056.1
Clostridium difficile M68, complete genome	300	432	0.7	3e-77	0.86	FN668375.1
Clostridium difficile complete genome, strain CF5	300	432	0.7	3e-77	0.86	FN665652.1
Clostridium difficile enterotoxin A (tcdA) gene, partial cds	300	432	0.7	3e-77	0.86	AF217291.1
Clostridium difficile gene for toxin A, partial cds	300	432	0.7	3e-77	0.86	AB012304.1
C.difficile tcdA gene, CROP repeat region	294	421	0.7	1e-75	0.85	Y12616.1
Clostridium difficile cdtA gene for enterotoxin A, part	244	679	0.6	1e-60	0.82	X17194.1
Clostridium difficile strain 95600 toxin A (tcdA) gene, partial cds	87.9	87.9	0.11	2e-13	0.96	DQ117251.1

[truncated: 2 more sheets: A6_AF, A6_AR]
