# Supplementary material for: New Insights into Clostridium difficile (CD) Infection in Latin America: Novel Description of Toxigenic Profiles of Diarrhea-Associated to CD in Bogotá, Colombia
Source: Front Microbiol. 2018 Jan 30;9:74. doi: 10.3389/fmicb.2018.00074 (PMC5797639; doi:10.3389/fmicb.2018.00074)
Supplement: Supplementary file 11 [file Table11.XLSX]

## Sheet: CD54_cdtApos
Description	Max score	Total score	Query cover	E value	Ident	Accession
Gorilla gorilla chromosome 8 clone CH277-15E23, complete sequence	51.8	51.8	0.46	0.003	0.84	AC275371.1
Homo sapiens ADAM metallopeptidase domain 9 (ADAM9), RefSeqGene on chromosome 8	48.2	48.2	0.33	0.039	0.89	NG_016335.1
Homo sapiens chromosome 8, clone CTD-2544N14, complete sequence	48.2	48.2	0.33	0.039	0.89	AC108863.4
Clostridium formicaceticum strain DSM 92, complete genome	46.4	46.4	0.3	0.14	0.89	CP020559.1
Clostridium formicaceticum strain ATCC 27076, complete genome	46.4	46.4	0.3	0.14	0.89	CP017603.1
Apteryx australis mantelli genome assembly AptMant0, scaffold scaffold397	46.4	46.4	0.24	0.14	0.96	LK064967.1
PREDICTED: Sesamum indicum uncharacterized LOC105169073 (LOC105169073), mRNA	44.6	44.6	0.35	0.47	0.85	XM_011089348.2
Elizabethkingia anophelis strain E6809, complete genome	44.6	44.6	0.4	0.47	0.84	CP014339.1
Bacillus sp. Alg07, complete genome	44.6	44.6	0.32	0.47	0.86	CP016020.1
Sus scrofa genome assembly, chromosome: X	44.6	44.6	0.47	0.47	0.79	LT634571.1
Strongyloides stercoralis genome assembly S_stercoralis_PV0001, scaffold SSTP_contig0000011	44.6	44.6	0.55	0.47	0.77	LL999062.1
Mycoplasma putrefaciens Mput9231, complete genome	44.6	44.6	0.46	0.47	0.81	CP004357.1
Mycoplasma putrefaciens KS1, complete genome	44.6	44.6	0.46	0.47	0.81	CP003021.1
Pig DNA sequence from clone CH242-255L16 on chromosome X, complete sequence	44.6	44.6	0.47	0.47	0.79	FP339590.5
Cellulophaga algicola DSM 14237, complete genome	44.6	44.6	0.27	0.47	0.91	CP002453.1
PREDICTED: Atta colombica putative ATP-dependent RNA helicase DHX30 (LOC108694308), mRNA	42.8	42.8	0.46	1.7	0.8	XM_018203719.1
Homo sapiens chromosome 8 clone CH17-306H24, complete sequence	42.8	42.8	0.46	1.7	0.78	AC270251.1
Homo sapiens microcephalin 1 (MCPH1), RefSeqGene on chromosome 8	42.8	42.8	0.46	1.7	0.78	NG_016619.2
PREDICTED: Protobothrops mucrosquamatus sorting nexin 13 (SNX13), mRNA	42.8	42.8	0.4	1.7	0.81	XM_015810804.1
Brugia pahangi genome assembly B_pahangi_Glasgow, scaffold BPAG_scaffold0000005	42.8	42.8	0.41	1.7	0.84	LK964164.1
Phaseolus vulgaris hypothetical protein (PHAVU_006G074600g) mRNA, complete cds	42.8	42.8	0.44	1.7	0.8	XM_007146780.1
Streptococcus salivarius JIM8777 complete genome	42.8	42.8	0.48	1.7	0.77	FR873482.1
Clostridium difficile strain AE978 binary toxin gene locus, complete sequence	42.8	42.8	0.2	1.7	1	HQ639678.1
Clostridium difficile strain A765 binary toxin gene locus, complete sequence	42.8	42.8	0.2	1.7	1	HQ639677.1
Clostridium difficile strain AM478 binary toxin gene locus, complete sequence	42.8	42.8	0.2	1.7	1	HQ639676.1
Clostridium difficile strain AE70 binary toxin gene locus, complete sequence	42.8	42.8	0.2	1.7	1	HQ639675.1
Clostridium difficile strain C421 binary toxin gene locus, complete sequence	42.8	42.8	0.2	1.7	1	HQ639672.1
Clostridium difficile strain AD667 binary toxin gene locus, complete sequence	42.8	42.8	0.2	1.7	1	HQ639670.1
Clostridium difficile BI1 chromosome, complete sequence	42.8	42.8	0.2	1.7	1	FN668941.1
Clostridium difficile complete genome, strain 2007855	42.8	42.8	0.2	1.7	1	FN665654.1
Clostridium difficile R20291 complete genome	42.8	42.8	0.2	1.7	1	FN545816.1
Clostridium difficile CD196 complete genome, strain CD196	42.8	42.8	0.2	1.7	1	FN538970.1
Clostridium difficile strain CD196 ADP-ribosyltransferase enzymatic component (cdtA) and ADP-ribosyltransferase binding component (cdtB) genes, complete cds	42.8	42.8	0.2	1.7	1	EF581852.1
Clostridium difficile ADP-ribosyltransferase enzymatic component (cdtA) and ADP-ribosyltransferase binding component (cdtB) genes, complete cds	42.8	42.8	0.2	1.7	1	L76081.2
Homo sapiens protein tyrosine phosphatase, receptor type, R, mRNA (cDNA clone IMAGE:5585629), partial cds	42.8	42.8	0.4	1.7	0.8	BC072386.1
Homo sapiens chromosome 8, clone RP11-16G12, complete sequence	42.8	42.8	0.46	1.7	0.78	AC018398.10
Homo sapiens chromosome 8, clone RP11-143D15, complete sequence	42.8	42.8	0.46	1.7	0.78	AC011835.8
Homo sapiens chromosome 8, clone RP11-115C21, complete sequence	42.8	42.8	0.46	1.7	0.78	AC016065.14
Mus Musculus Strain C57BL6/J Chromosome 5 RP23-327P24, complete sequence	42.8	42.8	0.28	1.7	0.88	AC084217.7
Clostridium difficile CdtA (cdtA) and CdtB (cdtB) genes, complete cds	42.8	42.8	0.2	1.7	1	AF271719.1
Homo sapiens mRNA; cDNA DKFZp781C1038 (from clone DKFZp781C1038)	42.8	42.8	0.4	1.7	0.8	CR749836.1
Clostridium difficile partial cdtA gene for binary toxin, strain R10456	42.8	42.8	0.2	1.7	1	AJ238325.1
Clostridium difficile partial cdtA gene for binary toxin, strain IS51	42.8	42.8	0.2	1.7	1	AJ238324.1
Mouse DNA sequence from clone RP21-61H21 on chromosome 5, complete sequence	42.8	42.8	0.28	1.7	0.88	AL355177.14
Clostridium saccharobutylicum strain NCP 195, complete genome	41.0	41.0	0.32	5.8	0.86	CP016092.1
Clostridium saccharobutylicum strain NCP 258, complete genome	41.0	41.0	0.32	5.8	0.86	CP016091.1
Clostridium saccharobutylicum strain BAS/B3/SW/136, complete genome	41.0	41.0	0.32	5.8	0.86	CP016089.1
Clostridium saccharobutylicum strain NCP 200, complete genome	41.0	41.0	0.32	5.8	0.86	CP016086.1
Peptoclostridium difficile strain PC010 binary toxin protein gene, partial cds	41.0	41.0	0.19	5.8	1	KU304498.1
PREDICTED: Diaphorina citri lipoyl synthase, mitochondrial (LOC103514942), mRNA	41.0	41.0	0.27	5.8	0.88	XM_017446488.1
Streptococcus marmotae strain HTS5, complete genome	41.0	41.0	0.27	5.8	0.88	CP015196.1
Oryza sativa Japonica Group DNA, chromosome 7, cultivar: Nipponbare, complete sequence	41.0	41.0	0.38	5.8	0.84	AP014963.1
Ovis canadensis canadensis isolate 43U chromosome 2 sequence	41.0	41.0	0.28	5.8	0.88	CP011887.1
Apteryx australis mantelli genome assembly AptMant0, scaffold scaffold32	41.0	41.0	0.27	5.8	0.88	LK064646.1
Tetrahymena thermophila SB210 hypothetical protein partial mRNA	41.0	41.0	0.23	5.8	0.93	XM_001030442.3
Strongyloides venezuelensis genome assembly S_venezuelensis_HH1, scaffold SVE_scaffold0000031	41.0	41.0	0.3	5.8	0.86	LM524999.1
Hymenolepis diminuta genome assembly H_diminuta_Denmark, scaffold HDID_contig0000229	41.0	41.0	0.47	5.8	0.76	LM384006.1
Wuchereria bancrofti genome assembly W_bancrofti_Jakarta, scaffold WBA_contig0002871	41.0	41.0	0.3	5.8	0.86	LM003785.1
Cyprinus carpio genome assembly common carp genome, scaffold 000028863	41.0	41.0	0.43	5.8	0.78	LN598462.1
Triticum aestivum chromosome 3B, genomic scaffold, cultivar Chinese Spring	41.0	41.0	0.33	5.8	0.87	HG670306.1
Clostridium saccharobutylicum DSM 13864, complete genome	41.0	41.0	0.32	5.8	0.86	CP006721.1
Homo sapiens enhancer of zeste 2 polycomb repressive complex 2 subunit (EZH2), RefSeqGene (LRG_531) on chromosome 7	41.0	41.0	0.4	5.8	0.79	NG_032043.1
Nectria haematococca mpVI 77-13-4 predicted protein, mRNA	41.0	41.0	0.21	5.8	0.96	XM_003040018.1
Bos taurus protein tyrosine phosphatase, receptor type R (PTPRR), transcript variant 2, mRNA	41.0	41.0	0.39	5.8	0.8	NM_001113261.1
Pan troglodytes BAC clone CH251-635P23 from chromosome 7, complete sequence	41.0	41.0	0.4	5.8	0.79	AC188684.3
Pan troglodytes BAC clone CH251-13K2 from chromosome 7, complete sequence	41.0	41.0	0.4	5.8	0.79	AC192396.1
Trichodesmium erythraeum IMS101, complete genome	41.0	41.0	0.25	5.8	0.93	CP000393.1
Zebrafish DNA sequence from clone DKEY-22A24 in linkage group 3, complete sequence	41.0	41.0	0.3	5.8	0.86	BX936284.27
Mus musculus chromosome 1, clone RP24-82I5, complete sequence	41.0	41.0	0.23	5.8	0.93	AC118698.7
Mus musculus 10 BAC RP23-202A18 (Roswell Park Cancer Institute (C57BL/6J Female) Mouse BAC Library) complete sequence	41.0	41.0	0.53	5.8	0.76	AC153530.9
Homo sapiens PAC clone RP5-1151M5 from 7, complete sequence	41.0	41.0	0.4	5.8	0.79	AC006323.3
Tetraodon nigroviridis full-length cDNA	41.0	41.0	0.36	5.8	0.81	CR700461.2
Homo sapiens BAC clone RP11-284H12 from 4, complete sequence	41.0	41.0	0.26	5.8	0.9	AC097655.2
Oryza sativa Japonica Group genomic DNA, chromosome 7, BAC clone:OJ1340_C08	41.0	41.0	0.38	5.8	0.84	AP005292.5
Oryza sativa Japonica Group genomic DNA, chromosome 7, PAC clone:P0524G08	41.0	41.0	0.38	5.8	0.84	AP004671.2
Homo sapiens BAC clone RP11-2F17 from 4, complete sequence	41.0	41.0	0.26	5.8	0.9	AC097454.2
Mus musculus BAC clone RP23-155B20 from 13, complete sequence	41.0	41.0	0.27	5.8	0.91	AC110817.6

## Sheet: CD54_cdtArev
Description	Max score	Total score	Query cover	E value	Ident	Accession
Rickettsia bellii RML369-C, complete genome	42.8	42.8	0.36	1.7	0.81	CP000087.1
Syphacia muris genome assembly S_muris_Valencia, scaffold SMUV_scaffold0000750	41.0	41.0	0.29	5.9	0.86	LK996835.1

## Sheet: CD57_cdtApos
Description	Max score	Total score	Query cover	E value	Ident	Accession
Roseburia intestinalis M50/1 draft genome	394	394	0.83	7e-106	0.97	FP929049.1
Roseburia intestinalis XB6B4 draft genome	385	385	0.83	4e-103	0.96	FP929050.1

## Sheet: CD57_cdtArev
Description	Max score	Total score	Query cover	E value	Ident	Accession
Roseburia intestinalis M50/1 draft genome	309	309	0.98	2e-80	0.86	FP929049.1
Roseburia intestinalis XB6B4 draft genome	295	295	0.98	5e-76	0.85	FP929050.1
PREDICTED: Pteropus vampyrus endogenous retrovirus group K member 8 Pol protein-like (LOC105311234), mRNA	44.6	44.6	0.11	1.4	0.91	XM_011387243.1
PREDICTED: Pteropus vampyrus endogenous retrovirus group K member 18 Pol protein-like (LOC105290532), mRNA	44.6	44.6	0.11	1.4	0.91	XM_011357746.1

## Sheet:  CD61_cdtApos
Description	Max score	Total score	Query cover	E value	Ident	Accession
PREDICTED: Ailuropoda melanoleuca EF-hand calcium binding domain 2 (EFCAB2), partial mRNA	42.8	42.8	0.17	2.9	0.9	XM_019798512.1
Theobroma cacao genome assembly, chromosome: II	42.8	42.8	0.17	2.9	0.9	LT594789.1
PREDICTED: Priapulus caudatus general transcription factor IIH subunit 1-like (LOC106811076), mRNA	42.8	42.8	0.19	2.9	0.91	XM_014814602.1
Apteryx australis mantelli genome assembly AptMant0, scaffold scaffold39	42.8	42.8	0.17	2.9	0.9	LK064800.1
Aplanochytrium kerguelense clone XDU02-H08, complete sequence	42.8	42.8	0.18	2.9	0.88	AC253950.1
Mus musculus targeted non-conditional, lacZ-tagged mutant allele Gls2:tm1e(EUCOMM)Wtsi; transgenic	42.8	42.8	0.12	2.9	1	JN950490.1
Mus musculus targeted KO-first, conditional ready, lacZ-tagged mutant allele Gls2:tm1a(EUCOMM)Wtsi; transgenic	42.8	42.8	0.12	2.9	1	JN950489.1
Mus musculus BAC clone RP24-151D9 from 10, complete sequence	42.8	42.8	0.12	2.9	1	AC135859.4
Mouse DNA sequence from clone RP23-193M23 on chromosome 4, complete sequence	42.8	42.8	0.15	2.9	0.93	AL929433.10

## Sheet: CD61_cdtArev
Description	Max score	Total score	Query cover	E value	Ident	Accession
Streptococcus parasanguinis FW213, complete genome	50.0	50.0	0.12	0.026	1	CP003122.1
Streptococcus parasanguinis ATCC 15912, complete genome	50.0	50.0	0.12	0.026	1	CP002843.1
Moniliophthora roreri MCA 2997 leucine-trna ligase partial mRNA	46.4	46.4	0.21	0.32	0.84	XM_007852592.1
PREDICTED: Carica papaya probable kinetochore protein SPC25 (LOC110808028), mRNA	44.6	44.6	0.16	1.1	0.87	XM_022033353.1
Paenibacillus sp. LPB0068, complete genome	42.8	42.8	0.19	3.9	0.84	CP017770.1
Spirometra erinaceieuropaei genome assembly S_erinaceieuropaei, scaffold SPER_scaffold0098117	42.8	42.8	0.15	3.9	0.86	LN103846.1
Uncultured bacterium contig00405 genomic sequence	42.8	42.8	0.16	3.9	0.84	JX827868.1

## Sheet: CD125_cdtApos
Description	Max score	Total score	Query cover	E value	Ident	Accession
Acetobacter pasteurianus subsp. paradoxus strain LMG 1591 plasmid unnamed1, complete sequence	42.8	42.8	0.05	0.68	0.86	CP015169.1
Limnochorda pilosa DNA, complete genome, strain: HC45	41.0	81.9	0.06	2.4	0.79	AP014924.1
Carnobacterium inhibens subsp. gilichinskyi strain WN1359, complete genome	41.0	41.0	0.04	2.4	0.88	CP006812.1
Pelagibaca abyssi strain JLT2014, complete genome	39.2	39.2	0.03	8.3	0.92	CP015093.1
Ezakiella sp. Marseille-P2951 strain Marseille-P2951T genome assembly, chromosome: contig00001	39.2	39.2	0.04	8.3	0.88	LT635475.1
[Clostridium] sphenoides JCM 1415 strain ATCC 19403 genome assembly, chromosome: I	39.2	78.3	0.11	8.3	0.92	LT630003.1
Niabella soli DSM 19437, complete genome	39.2	39.2	0.02	8.3	1	CP007035.1
Tetrapisispora phaffii CBS 4417 hypothetical protein (TPHA0H02520), partial mRNA	39.2	39.2	0.05	8.3	0.83	XM_003686841.1
Tetrapisispora phaffii CBS 4417 chromosome 8, complete genome	39.2	39.2	0.05	8.3	0.83	HE612863.1
Ramlibacter tataouinensis TTB310, complete genome	39.2	39.2	0.04	8.3	0.87	CP000245.1
Verrucosispora maris AB-18-032, complete genome	39.2	39.2	0.02	8.3	1	CP002638.1
Pseudarthrobacter chlorophenolicus A6 plasmid pACHL02, complete sequence	39.2	39.2	0.03	8.3	0.93	CP001343.1
Exiguobacterium sibiricum 255-15, complete genome	39.2	39.2	0.03	8.3	0.88	CP001022.1
Arthrobacter chlorophenolicus A6 4-chlorophenol catabolic gene cluster, partial sequence	39.2	39.2	0.03	8.3	0.93	AY131335.1

## Sheet: CD125_cdtArev
Description	Max score	Total score	Query cover	E value	Ident	Accession
PREDICTED: Dendrobium catenatum heavy metal-associated isoprenylated plant protein 41-like (LOC110111472), mRNA	46.4	46.4	0.13	0.33	0.93	XM_020843373.1
PREDICTED: Dendrobium catenatum uncharacterized protein At4g26485-like (LOC110111632), mRNA	44.6	44.6	0.12	1.1	0.93	XM_020843585.1
Toxocara canis genome assembly T_canis_Equador, scaffold TCNE_scaffold0000939	44.6	44.6	0.11	1.1	0.96	LM036803.1
Echinostoma caproni genome assembly E_caproni_Egypt, scaffold ECPE_scaffold0024524	44.6	44.6	0.12	1.1	0.93	LL258280.1
Solanum pennellii chromosome ch03, complete genome	44.6	44.6	0.12	1.1	0.93	HG975442.1
Babesia equi hypothetical protein (BEWA_004340) mRNA, complete cds	44.6	44.6	0.12	1.1	0.93	XM_004830635.1
Babesia equi strain WA chromosome 3, complete sequence	44.6	44.6	0.12	1.1	0.93	CP001670.1
Mus musculus chromosome 8, clone RP23-122L19, complete sequence	44.6	44.6	0.16	1.1	0.89	AC113969.7
PREDICTED: Acanthaster planci arf-GAP with SH3 domain, ANK repeat and PH domain-containing protein 2-like (LOC110985045), transcript variant X4, mRNA	42.8	42.8	0.11	4.0	0.96	XM_022245758.1
PREDICTED: Acanthaster planci arf-GAP with SH3 domain, ANK repeat and PH domain-containing protein 2-like (LOC110985045), transcript variant X3, mRNA	42.8	42.8	0.11	4.0	0.96	XM_022245757.1
PREDICTED: Acanthaster planci arf-GAP with SH3 domain, ANK repeat and PH domain-containing protein 2-like (LOC110985045), transcript variant X2, mRNA	42.8	42.8	0.11	4.0	0.96	XM_022245756.1
PREDICTED: Acanthaster planci arf-GAP with SH3 domain, ANK repeat and PH domain-containing protein 2-like (LOC110985045), transcript variant X1, mRNA	42.8	42.8	0.11	4.0	0.96	XM_022245755.1
Oryzias latipes strain HNI chromosome 1	42.8	42.8	0.12	4.0	0.93	CP020779.1
Pseudomonas amygdali pv. lachrymans strain NM002, complete genome	42.8	42.8	0.14	4.0	0.89	CP020351.1
Clostridium taeniosporum strain 1/k, complete genome	42.8	42.8	0.16	4.0	0.84	CP017253.1
PREDICTED: Cucumis melo uncharacterized LOC103502691 (LOC103502691), transcript variant X2, mRNA	42.8	42.8	0.15	4.0	0.89	XM_017047802.1
PREDICTED: Cucumis melo uncharacterized LOC103502691 (LOC103502691), transcript variant X1, mRNA	42.8	42.8	0.15	4.0	0.89	XM_008466721.2
Collimonas pratensis strain Ter291, complete genome	42.8	42.8	0.14	4.0	0.88	CP013236.1
PREDICTED: Astyanax mexicanus NADPH--cytochrome P450 reductase-like (LOC103023972), mRNA	42.8	42.8	0.14	4.0	0.88	XM_015608143.1
Cucumis melo genomic chromosome, chr_4	42.8	42.8	0.15	4.0	0.89	LN713258.1
Cucumis melo genomic scaffold, anchoredscaffold00098	42.8	42.8	0.15	4.0	0.89	LN681840.1
Glycine max strain Williams 82 clone GM_WBb0136M08, complete sequence	42.8	42.8	0.12	4.0	0.93	AC235422.1
Nostoc punctiforme PCC 73102, complete genome	42.8	42.8	0.13	4.0	0.9	CP001037.1
Bacteroides thetaiotaomicron VPI-5482, complete genome	42.8	42.8	0.13	4.0	0.9	AE015928.1
Bacteroides thetaiotaomicron RNase P (rnpB) gene, RNA component	42.8	42.8	0.13	4.0	0.9	L25702.1
