# Supplementary material for: New Insights into Clostridium difficile (CD) Infection in Latin America: Novel Description of Toxigenic Profiles of Diarrhea-Associated to CD in Bogotá, Colombia
Source: Front Microbiol. 2018 Jan 30;9:74. doi: 10.3389/fmicb.2018.00074 (PMC5797639; doi:10.3389/fmicb.2018.00074)
Supplement: Supplementary file 12 [file Table12.XLSX]

## Sheet: CD15_cdtBpos
Description	Max score	Total score	Query cover	E value	Ident	Accession
Homo sapiens chromosome 5 clone RP11-125A13, complete sequence	82.4	82.4	0.16	1e-11	0.78	AC110002.2
Human DNA sequence from clone RP11-92P6 on chromosome 10, complete sequence	82.4	82.4	0.13	1e-11	0.81	AL512654.9
Homo sapiens chromosome 5 clone CTC-502M5, complete sequence	82.4	196	0.16	1e-11	0.78	AC008547.6
Homo sapiens chromosome 8, clone CTD-3107M8, complete sequence	80.6	339	0.15	5e-11	0.78	AC109329.8
Homo sapiens chromosome 8, clone CTD-2345M20, complete sequence	80.6	232	0.15	5e-11	0.78	AC090820.6
Pan troglodytes BAC clone CH251-62F21 from chromosome unknown, complete sequence	78.8	196	0.13	2e-10	0.8	AC213065.4
Pan troglodytes BAC clone CH251-265N17 from chromosome 13, complete sequence	78.8	254	0.13	2e-10	0.81	AC156808.2
Pan troglodytes BAC clone CH251-214F24 from chromosome unknown, complete sequence	78.8	200	0.13	2e-10	0.81	AC171181.3
Homo sapiens BAC clone RP11-516D7 from 4, complete sequence	78.8	125	0.13	2e-10	0.81	AC110789.6
Homo sapiens BAC clone RP11-366H4 from 4, complete sequence	78.8	234	0.13	2e-10	0.81	AC138781.4
Homo sapiens chromosome 8 clone CTA-393A7 map 8cen, complete sequence	78.8	78.8	0.13	2e-10	0.81	AF165144.4
Homo sapiens BAC clone RP11-458M1 from 4, complete sequence	78.8	125	0.13	2e-10	0.81	AC133529.3
Homo sapiens BAC clone RP11-353P23 from 2, complete sequence	78.8	189	0.13	2e-10	0.81	AC005035.2
Human chromosome 14 DNA sequence BAC R-176H8 of library RPCI-11 from chromosome 14 of Homo sapiens (Human), complete sequence	78.8	398	0.13	2e-10	0.81	AL139353.3
Homo sapiens decapping enzyme, scavenger (DCPS), RefSeqGene on chromosome 11	77.0	77.0	0.13	6e-10	0.8	NG_053153.1
Pongo pygmaeus genome assembly, chromosome: XII	77.0	58923	0.16	6e-10	0.76	LT571452.1
Homo sapiens neural EGFL like 1 (NELL1), RefSeqGene on chromosome 11	77.0	307	0.14	6e-10	0.79	NG_047064.1
Macaca fascicularis complete genome, chromosome chr1	77.0	53353	0.16	6e-10	0.77	LT160000.1
Homo sapiens prolactin receptor (PRLR), RefSeqGene on chromosome 5	77.0	77.0	0.13	6e-10	0.8	NG_029042.2
Homo sapiens phosphofurin acidic cluster sorting protein 1 (PACS1), RefSeqGene on chromosome 11	77.0	173	0.13	6e-10	0.8	NG_033900.1
Homo sapiens nidogen 1 (NID1), RefSeqGene on chromosome 1	77.0	77.0	0.15	6e-10	0.77	NG_033228.1
Homo sapiens erythrocyte membrane protein band 4.1 (EPB41), RefSeqGene on chromosome 1	77.0	136	0.13	6e-10	0.8	NG_013344.1
Homo sapiens FOSMID clone ABC14-50095800L7 from chromosome unknown, complete sequence	77.0	232	0.13	6e-10	0.8	AC231768.2
Homo sapiens protein phosphatase 2 regulatory subunit Bbeta (PPP2R2B), RefSeqGene on chromosome 5	77.0	239	0.14	6e-10	0.78	NG_011570.1
Homo sapiens NEL-like 1 (chicken) (NELL1) gene, complete cds	77.0	307	0.14	6e-10	0.79	EU518937.1
MACACA MULATTA BAC clone CH250-108L20 from chromosome 20, complete sequence	77.0	266	0.13	6e-10	0.8	AC197751.3
Rhesus Macaque BAC CH250-278P13 () complete sequence	77.0	123	0.14	6e-10	0.8	AC190318.8
Homo sapiens BAC clone RP11-1383E23 from 7, complete sequence	77.0	134	0.13	6e-10	0.8	AC104094.4
Homo sapiens clone SKA02-D03 putative promoter sequence	77.0	77.0	0.13	6e-10	0.8	AY271222.1
Homo sapiens, clone RP11-118B18, complete sequence	77.0	128	0.13	6e-10	0.8	AC011591.9
Homo sapiens chromosome 5 clone CTD-2258D22, complete sequence	77.0	77.0	0.13	6e-10	0.8	AC091851.2
Homo sapiens chromosome 3 clone CTD-2330K9, complete sequence	77.0	362	0.13	6e-10	0.8	AC105935.2
Homo sapiens chromosome 11, clone RP11-558L11, complete sequence	77.0	77.0	0.14	6e-10	0.79	AC067794.5
Homo sapiens chromosome 5 clone CTB-99A3, complete sequence	77.0	123	0.14	6e-10	0.78	AC008728.7
Human DNA sequence from clone RP5-940F7 on chromosome 1q42.2-43, complete sequence	77.0	187	0.15	6e-10	0.77	AL139161.8
Human DNA sequence from clone RP11-402G3 on chromosome 9, complete sequence	77.0	434	0.13	6e-10	0.8	AL160275.14
Human DNA sequence from clone RP11-479K20 on chromosome 9q34.12-34.3, complete sequence	77.0	127	0.13	6e-10	0.8	AL159997.14
Human DNA sequence from clone RP1-212P9 on chromosome 1p34.1-35, complete sequence	77.0	391	0.13	6e-10	0.8	AL009181.1
Homo sapiens 12 BAC RP11-579D7 (Roswell Park Cancer Institute Human BAC Library) complete sequence	77.0	343	0.14	6e-10	0.82	AC117498.6
Homo sapiens genomic DNA, chromosome 11 clone:RP11-675B4, complete sequence	77.0	128	0.13	6e-10	0.8	AP000822.3
Homo sapiens genomic DNA, chromosome 11 clone:RP11-712L6, complete sequence	77.0	77.0	0.13	6e-10	0.8	AP001318.6
Homo sapiens genomic DNA, chromosome 11q, clone:RP11-711K22, complete sequence	77.0	184	0.13	6e-10	0.8	AP000908.4
Homo sapiens genomic DNA, chromosome 11q, clone:RP11-939C17	77.0	128	0.13	6e-10	0.8	AP002815.3
Homo sapiens genomic DNA, chromosome 8q23, clone:KB1930G5	77.0	128	0.14	6e-10	0.79	AP001208.3
Homo sapiens SAM and SH3 domain containing 1 (SASH1), RefSeqGene on chromosome 6	75.2	553	0.13	2e-09	0.81	NG_051927.1
PREDICTED: Rhinopithecus bieti neuferricin (LOC108520716), transcript variant X1, mRNA	75.2	75.2	0.13	2e-09	0.8	XM_017860197.1
PREDICTED: Rhinopithecus roxellana neuferricin (LOC104677225), mRNA	75.2	75.2	0.13	2e-09	0.8	XM_010382189.1
Homo sapiens BAC clone CH17-415B15 from chromosome 17, complete sequence	75.2	359	0.13	2e-09	0.8	AC245758.3
Pongo abelii BAC clone CH276-95H6 from chromosome unknown, complete sequence	75.2	411	0.13	2e-09	0.8	AC216057.4
Homo sapiens FOSMID clone ABC9-43907900N8 from chromosome 12, complete sequence	75.2	75.2	0.14	2e-09	0.78	AC215713.3
Homo sapiens moesin (MSN), RefSeqGene on chromosome X	75.2	127	0.13	2e-09	0.8	NG_012516.1
Human DNA sequence from clone RP11-368D24 on chromosome Xq13.1-21.1, complete sequence	75.2	287	0.13	2e-09	0.8	AL354652.11
Homo sapiens isolate SLC3A1-VI-T solute carrier organic anion transporter family member 3A1 (SLCO3A1) gene, complete cds	75.2	195	0.13	2e-09	0.8	FJ515841.1
Homo sapiens doublesex and mab-3 related transcription factor 1 (DMRT1), RefSeqGene on chromosome 9	75.2	479	0.13	2e-09	0.79	NG_009221.1
Homo sapiens FOSMID clone ABC8-5694649G24 from chromosome 8, complete sequence	75.2	75.2	0.13	2e-09	0.8	AC231608.2
Pan troglodytes BAC clone CH251-483F6 from chromosome 7, complete sequence	75.2	127	0.16	2e-09	0.76	AC212917.3
Pan troglodytes BAC clone CH251-168F22 from chromosome x, complete sequence	75.2	132	0.13	2e-09	0.81	AC195298.3
Macaca mulatta BAC CH250-456D18 (Children's Hospital Oakland Research Institute Rhesus macaque Adult Male BAC Library) complete sequence	75.2	276	0.15	2e-09	0.78	AC197858.5
Pan troglodytes BAC clone CH251-430K9 from chromosome x, complete sequence	75.2	267	0.13	2e-09	0.81	AC193255.3
Pongo abelii BAC clone CH276-71G1 from chromosome unknown, complete sequence	75.2	75.2	0.13	2e-09	0.79	AC205917.3
Homo sapiens chromosome 8, clone WI2-80720H9, complete sequence	75.2	75.2	0.13	2e-09	0.8	AC145110.3
Homo sapiens sodium solute symporter family 5 member 8 protein (SLC5A8) gene, complete cds	75.2	75.2	0.14	2e-09	0.78	AF536217.1
Homo sapiens chromosome 3 clone RP11-348P10, complete sequence	75.2	75.2	0.13	2e-09	0.8	AC124045.2
Homo sapiens chromosome 15, clone RP11-186H10, complete sequence	75.2	127	0.13	2e-09	0.8	AC113190.8
Homo sapiens chromosome 5 clone RP11-357F12, complete sequence	75.2	125	0.13	2e-09	0.8	AC116350.2
Homo sapiens chromosome 3 clone RP11-189H19, complete sequence	75.2	234	0.15	2e-09	0.8	AC092046.2
Homo sapiens 12 BAC RP11-399D15 (Roswell Park Cancer Institute Human BAC Library) complete sequence	75.2	132	0.14	2e-09	0.78	AC079953.28
Homo sapiens 12 BAC RP11-64B16 (Roswell Park Cancer Institute Human BAC Library) complete sequence	75.2	75.2	0.13	2e-09	0.8	AC084880.12
Homo sapiens chromosome 5 clone RP11-184E9, complete sequence	75.2	132	0.13	2e-09	0.79	AC106754.3
Human DNA sequence from clone RP11-502H18 on chromosome 1, complete sequence	75.2	189	0.13	2e-09	0.8	AL390718.11
Human DNA sequence from clone RP11-550P23 on chromosome 13, complete sequence	75.2	136	0.13	2e-09	0.8	AL353648.27
Human DNA sequence from clone RP11-400P17 on chromosome 6, complete sequence	75.2	389	0.13	2e-09	0.81	AL513164.13
Human DNA sequence from clone RP11-523H24 on chromosome 13, complete sequence	75.2	230	0.12	2e-09	0.81	AL354808.24
Homo sapiens 12 BAC RP11-219I17 (Roswell Park Cancer Institute Human BAC Library) complete sequence	75.2	132	0.14	2e-09	0.78	AC063951.22
Human DNA sequence from clone RP11-421H8 on chromosome 9, complete sequence	75.2	396	0.13	2e-09	0.8	AL158830.17
Human DNA sequence from clone RP11-29P20 on chromosome 13q31.1-31.3, complete sequence	75.2	121	0.16	2e-09	0.78	AL355578.4
Homo sapiens BAC clone RP11-125K7 from 11, complete sequence	75.2	339	0.12	2e-09	0.81	AC009470.4
Human DNA sequence from clone RP11-143M15 on chromosome 9p23-24.3, complete sequence	75.2	582	0.13	2e-09	0.79	AL136365.9
Human DNA sequence from clone RP6-11O7 on chromosome 22q13.1-13.2, complete sequence	75.2	184	0.13	2e-09	0.8	AL031589.10
Human DNA sequence from clone RP3-426I6 on chromosome 1p34.1-35, complete sequence	75.2	500	0.13	2e-09	0.8	AL020997.1
Pan troglodytes chromosome 22 clone:RP43-125I01, map 22, complete sequences	75.2	75.2	0.13	2e-09	0.8	BS000092.1
Homo sapiens chromosome 16 clone RP11-830F9, complete sequence	75.2	136	0.12	2e-09	0.83	AC092384.5
Homo sapiens BAC clone RP11-68O1 from 4, complete sequence	75.2	75.2	0.12	2e-09	0.81	AC084277.3
Homo sapiens genomic DNA, chromosome 8p12, clone: KB1250F11, complete sequence	75.2	75.2	0.13	2e-09	0.8	AP006543.1
Homo sapiens genomic DNA, chromosome 11 clone:RP11-1167A19, complete sequence	75.2	319	0.12	2e-09	0.81	AP006287.2
Homo sapiens genomic DNA, chromosome 11, clone:RP11-821O7, complete sequence	75.2	275	0.12	2e-09	0.81	AP001201.7
Homo sapiens procollagen C-proteinase enhancer protein (PCOLCE) gene, 5' flanking region and complete cds	75.2	125	0.13	2e-09	0.8	AF083655.1
Human Chromosome 15q26.1 PAC clone pDJ430i19, complete sequence	75.2	136	0.13	2e-09	0.8	AC005319.1
Homo sapiens WD repeat domain 25 (WDR25), RefSeqGene on chromosome 14	73.4	127	0.15	8e-09	0.77	NG_053195.1
Homo sapiens G-patch domain containing 2 (GPATCH2), RefSeqGene on chromosome 1	73.4	184	0.13	8e-09	0.8	NG_053034.1
Homo sapiens solute carrier family 1 member 4 (SLC1A4), RefSeqGene on chromosome 2	73.4	73.4	0.13	8e-09	0.79	NG_053002.1
Homo sapiens Bardet-Biedl syndrome 9 (BBS9), RefSeqGene on chromosome 7	73.4	73.4	0.13	8e-09	0.79	NG_009306.2
Homo sapiens chromosome 12 epithelial sodium channel alpha-subunit gene, complete cds	73.4	127	0.14	8e-09	0.78	AH007622.2
Homo sapiens chromosome 12 signal transducer and activator of transcription 6 (STAT6) gene, complete cds	73.4	73.4	0.13	8e-09	0.79	AH006951.2
PREDICTED: Pan troglodytes MID1 interacting protein 1 (MID1IP1), mRNA	73.4	73.4	0.12	8e-09	0.8	XM_016943632.1
Homo sapiens DExD/H-box helicase 58 (DDX58), RefSeqGene on chromosome 9	73.4	73.4	0.13	8e-09	0.79	NG_046918.1
Homo sapiens BAC clone CH17-178P23 from chromosome 15, complete sequence	73.4	587	0.13	8e-09	0.79	AC270230.1
Homo sapiens BAC clone CH17-276B20 from chromosome 15, complete sequence	73.4	382	0.13	8e-09	0.79	AC270170.1
Macaca mulatta isolate Rh24400_6294-1 major histocompatibility complex genomic sequence	73.4	73.4	0.12	8e-09	0.82	KT331439.1
Macaca fascicularis complete genome, chromosome chr2	69.8	32330	0.16	9e-08	0.79	LT160001.1

## Sheet: CD15_cdtBrev
Description	Max score	Total score	Query cover	E value	Ident	Accession
Macaca fascicularis complete genome, chromosome chr3	77.0	4404	0.16	5e-10	0.85	LT160002.1
PREDICTED: Pongo abelii transmembrane protein 67 (TMEM67), transcript variant X2, mRNA	77.0	77.0	0.12	5e-10	0.86	XM_009243951.1
PREDICTED: Pongo abelii transmembrane protein 67 (TMEM67), transcript variant X1, mRNA	77.0	77.0	0.12	5e-10	0.86	XM_002819276.1
Homo sapiens interleukin 6 (IL6), RefSeqGene on chromosome 7	77.0	77.0	0.14	5e-10	0.85	NG_011640.1
Pan troglodytes BAC clone CH251-302N1 from chromosome 7, complete sequence	77.0	77.0	0.14	5e-10	0.85	AC193002.3
Pan troglodytes BAC clone CH251-470E17 from chromosome 7, complete sequence	77.0	77.0	0.14	5e-10	0.85	AC188427.4
Homo sapiens BAC clone RP11-240H8 from 7, complete sequence	77.0	77.0	0.14	5e-10	0.85	AC073072.11
Homo sapiens chromosome 5 clone CTD-2164M17, complete sequence	75.2	75.2	0.14	2e-09	0.84	AC026788.4
Homo sapiens chromosome 5 clone RP11-317O24, complete sequence	75.2	75.2	0.14	2e-09	0.84	AC022441.5
Homo sapiens chromosome 5 clone CTD-2146K10, complete sequence	75.2	75.2	0.14	2e-09	0.84	AC008831.7
Homo sapiens mannose receptor C-type 1 (MRC1), RefSeqGene on chromosome 10	73.4	73.4	0.13	6e-09	0.85	NG_047011.1
Homo sapiens glucosaminyl (N-acetyl) transferase 2, I-branching enzyme (I blood group) (GCNT2), RefSeqGene on chromosome 6	73.4	73.4	0.13	6e-09	0.85	NG_007469.3
Homo sapiens mutL homolog 1 (MLH1), RefSeqGene (LRG_216) on chromosome 3	73.4	73.4	0.12	6e-09	0.86	NG_007109.2
Pongo abelii BAC clone CH276-254A20 from chromosome unknown, complete sequence	73.4	73.4	0.13	6e-09	0.85	AC206413.3
Homo sapiens macrophage mannose receptor 1 precursor (MRC1) gene, complete cds	73.4	73.4	0.13	6e-09	0.85	EF444997.1
Rhesus Macaque BAC CH250-358H20 () complete sequence	73.4	73.4	0.13	6e-09	0.86	AC202852.4
Pan troglodytes BAC clone CH251-573O21 from chromosome 7, complete sequence	73.4	139	0.14	6e-09	0.84	AC187745.2
Human DNA sequence from clone RP11-199F9 on chromosome 10 Contains part of the gene for a novel protein similar to mannose receptor C type 1 (MRC1), complete sequence	73.4	73.4	0.13	6e-09	0.85	AL928580.4
Homo sapiens 12 BAC RP11-96H19 (Roswell Park Cancer Institute Human BAC Library) complete sequence	73.4	73.4	0.13	6e-09	0.85	AC121337.7
Homo sapiens chromosome 10 clone RP11-457D2, complete sequence	73.4	73.4	0.13	6e-09	0.85	AC069023.5
Homo sapiens chromosome 5 clone CTB-70D3, complete sequence	73.4	73.4	0.13	6e-09	0.85	AC008697.7
Homo sapiens chromosome 5 clone RP11-122C5, complete sequence	73.4	73.4	0.13	6e-09	0.85	AC091435.3
Homo sapiens chromosome 5 clone CTD-2384B11, complete sequence	73.4	73.4	0.14	6e-09	0.83	AC025188.8
Homo sapiens BAC clone RP11-177C9 from 7, complete sequence	73.4	73.4	0.14	6e-09	0.84	AC091654.4
Human DNA sequence from clone RP11-360O19 on chromosome 6, complete sequence	73.4	73.4	0.13	6e-09	0.85	AL139039.17
Homo sapiens mutL homolog 1, colon cancer, nonpolyposis type 2 (E. coli) (MLH1) gene, complete cds	73.4	73.4	0.12	6e-09	0.86	AY217549.1
Homo sapiens BAC clone RP11-617F9 from 2, complete sequence	73.4	73.4	0.13	6e-09	0.85	AC022210.8
Homo sapiens BAC clone RP11-537E18 from 2, complete sequence	73.4	73.4	0.13	6e-09	0.87	AC011753.6
Homo sapiens chromosome 5 clone CTD-2231K23, complete sequence	73.4	73.4	0.13	6e-09	0.87	AC091394.2
Homo sapiens chromosome 3, clone RP11-129K12, complete sequence	73.4	73.4	0.12	6e-09	0.86	AC011816.17
PREDICTED: Gorilla gorilla gorilla transmembrane protein 67 (TMEM67), mRNA	71.6	71.6	0.12	2e-08	0.85	XM_019032936.1
PREDICTED: Gorilla gorilla gorilla F-box and leucine rich repeat protein 18 (FBXL18), transcript variant X2, mRNA	71.6	71.6	0.13	2e-08	0.84	XM_004045057.2
Pongo pygmaeus genome assembly, chromosome: XII	71.6	3499	0.16	2e-08	0.84	LT571452.1
PREDICTED: Homo sapiens transmembrane protein 67 (TMEM67), transcript variant X6, mRNA	71.6	71.6	0.12	2e-08	0.85	XM_011517363.2
PREDICTED: Homo sapiens transmembrane protein 67 (TMEM67), transcript variant X5, mRNA	71.6	71.6	0.12	2e-08	0.85	XM_006716686.3
PREDICTED: Homo sapiens transmembrane protein 67 (TMEM67), transcript variant X4, misc_RNA	71.6	71.6	0.12	2e-08	0.85	XR_928362.2
PREDICTED: Pan troglodytes transmembrane protein 67 (TMEM67), transcript variant X6, mRNA	71.6	71.6	0.12	2e-08	0.85	XM_016959682.1
PREDICTED: Pan troglodytes transmembrane protein 67 (TMEM67), transcript variant X1, mRNA	71.6	71.6	0.12	2e-08	0.85	XM_528307.4
PREDICTED: Pan paniscus transmembrane protein 67 (TMEM67), transcript variant X6, mRNA	71.6	71.6	0.12	2e-08	0.85	XM_008974608.1
Homo sapiens protein kinase C delta (PRKCD), RefSeqGene on chromosome 3	71.6	71.6	0.12	2e-08	0.86	NG_033864.1
PREDICTED: Pan paniscus transmembrane protein 67 (TMEM67), transcript variant X1, mRNA	71.6	71.6	0.12	2e-08	0.85	XM_003821111.1
Homo sapiens tripartite motif containing 37 (TRIM37), RefSeqGene on chromosome 17	71.6	71.6	0.13	2e-08	0.83	NG_009298.1
Homo sapiens transmembrane protein 67 (TMEM67), RefSeqGene (LRG_688) on chromosome 8	71.6	71.6	0.12	2e-08	0.85	NG_009190.1
Homo sapiens transmembrane protein 67 (TMEM67), transcript variant 2, mRNA	71.6	71.6	0.12	2e-08	0.85	NM_001142301.1
Homo sapiens transmembrane protein 67 (TMEM67), transcript variant 1, mRNA	71.6	71.6	0.12	2e-08	0.85	NM_153704.5
Rhesus Macaque BAC CH250-333F6 () complete sequence	71.6	71.6	0.12	2e-08	0.84	AC193651.6
Homo sapiens chromosome 17, clone RP11-58O9, complete sequence	71.6	71.6	0.14	2e-08	0.83	AC018629.12
Pan troglodytes BAC clone RP43-49P4 from chromosome 7, complete sequence	71.6	71.6	0.13	2e-08	0.83	AC147317.3
Homo sapiens chromosome 8, clone RP11-10N23, complete sequence	71.6	71.6	0.12	2e-08	0.85	AC010834.19
Human DNA sequence from clone RP3-476K8 on chromosome 1, complete sequence	71.6	117	0.13	2e-08	0.85	AL513365.27
Homo sapiens chromosome 19 clone CTC-258N23, complete sequence	71.6	132	0.14	2e-08	0.83	AC044792.6
Homo sapiens chromosome 17, clone RP11-802D6, complete sequence	71.6	71.6	0.12	2e-08	0.84	AC068025.12
Homo sapiens chromosome 8, clone RP3-388N13, complete sequence	71.6	71.6	0.12	2e-08	0.85	AC084346.3
Human DNA sequence from clone RP11-569G9 on chromosome 1, complete sequence	71.6	71.6	0.13	2e-08	0.85	AL451139.40
Homo sapiens chromosome 17, clone RP11-346N15, complete sequence	71.6	71.6	0.13	2e-08	0.83	AC036154.17
Homo sapiens mRNA; cDNA DKFZp686M05114 (from clone DKFZp686M05114)	71.6	71.6	0.14	2e-08	0.83	CR627306.1
Homo sapiens chromosome 17, clone CTD-2510F5, complete sequence	71.6	71.6	0.13	2e-08	0.83	AC099850.7
Homo sapiens chromosome 17, clone RP11-22N12, complete sequence	71.6	71.6	0.12	2e-08	0.84	AC005412.8
Homo sapiens chromosome 5 clone CTD-2030B15, complete sequence	71.6	71.6	0.15	2e-08	0.81	AC026413.5
Homo sapiens chromosome 3 clone RP11-82B23, complete sequence	71.6	139	0.13	2e-08	0.86	AC097015.2
Homo sapiens genomic DNA, chromosome 8q23, clone: KB1165G2	71.6	71.6	0.12	2e-08	0.85	AP004282.2
Homo sapiens chromosome 19, cosmid F21645, complete sequence	71.6	71.6	0.13	2e-08	0.84	AC005260.1
Homo sapiens chromosome 19, cosmid R31595, complete sequence	71.6	71.6	0.14	2e-08	0.83	AC004792.1
Homo sapiens cosmid clone N79E2 from 22q12, complete sequence	71.6	71.6	0.13	2e-08	0.84	U51561.1
Homo sapiens neurexophilin and PC-esterase domain family member 3 (NXPE3), RefSeqGene on chromosome 3	69.8	69.8	0.14	7e-08	0.83	NG_053180.1
Homo sapiens BRISC and BRCA1 A complex member 2 (BABAM2), RefSeqGene on chromosome 2	69.8	234	0.15	7e-08	0.84	NG_051044.1
PREDICTED: Pan troglodytes adducin 2 (ADD2), transcript variant X4, mRNA	69.8	69.8	0.14	7e-08	0.83	XM_016948722.1
PREDICTED: Pan troglodytes adducin 2 (ADD2), transcript variant X3, mRNA	69.8	69.8	0.14	7e-08	0.83	XM_016948721.1
PREDICTED: Pan troglodytes adducin 2 (ADD2), transcript variant X2, mRNA	69.8	69.8	0.14	7e-08	0.83	XM_009442634.2
PREDICTED: Pan troglodytes adducin 2 (ADD2), transcript variant X1, mRNA	69.8	69.8	0.14	7e-08	0.83	XM_001143954.5
Pongo abelii chromosome 7 clone CH276-357H4, complete sequence	69.8	69.8	0.13	7e-08	0.84	AC270610.1
Homo sapiens PRR5-ARHGAP8 readthrough (PRR5-ARHGAP8), RefSeqGene on chromosome 22	69.8	69.8	0.14	7e-08	0.82	NG_046967.1
Macaca fascicularis complete genome, chromosome chr2	69.8	4304	0.18	7e-08	0.84	LT160001.1
PREDICTED: Pan paniscus uncharacterized LOC106634464 (LOC106634464), ncRNA	69.8	69.8	0.14	7e-08	0.83	XR_001337842.1
Homo sapiens FANCD2 opposite strand (FANCD2OS), RefSeqGene on chromosome 3	69.8	69.8	0.13	7e-08	0.83	NG_042053.1
PREDICTED: Rhinopithecus roxellana ELM2 and Myb/SANT-like domain containing 1 (ELMSAN1), mRNA	69.8	69.8	0.13	7e-08	0.85	XM_010382610.1
Homo sapiens insulin like growth factor 2 mRNA binding protein 1 (IGF2BP1), RefSeqGene on chromosome 17	69.8	69.8	0.13	7e-08	0.84	NG_030585.1
Homo sapiens proline rich 5 (PRR5), RefSeqGene on chromosome 22	69.8	69.8	0.14	7e-08	0.82	NG_029235.1
Homo sapiens potassium voltage-gated channel subfamily J member 10 (KCNJ10), RefSeqGene on chromosome 1	69.8	69.8	0.14	7e-08	0.82	NG_016411.1
Homo sapiens testis expressed 11 (TEX11), RefSeqGene on chromosome X	69.8	180	0.14	7e-08	0.82	NG_012574.1
Homo sapiens FOSMID clone ABC14-50967400L19 from chromosome 12, complete sequence	69.8	69.8	0.13	7e-08	0.84	AC234454.2
Pan troglodytes BAC clone CH251-169M14 from chromosome x, complete sequence	69.8	69.8	0.13	7e-08	0.84	AC206053.3
MACACA MULATTA BAC clone CH250-491L17 from chromosome 14, complete sequence	69.8	69.8	0.12	7e-08	0.85	AC197502.3
Pan troglodytes BAC clone CH251-731P6 from chromosome x, complete sequence	69.8	69.8	0.13	7e-08	0.84	AC193861.3
Pan troglodytes BAC clone CH251-544A13 from chromosome 7, complete sequence	69.8	69.8	0.15	7e-08	0.81	AC192145.4
Homo sapiens chromosome 17, clone RP11-676J12, complete sequence	69.8	69.8	0.13	7e-08	0.85	AC087392.10
Homo sapiens PAC clone RP5-1136G2 from 7, complete sequence	69.8	69.8	0.15	7e-08	0.81	AC005377.2
Pan troglodytes BAC clone CH251-304P1 from chromosome unknown, complete sequence	69.8	69.8	0.13	7e-08	0.84	AC160567.2
Homo sapiens 3 BAC RP11-312H1 (Roswell Park Cancer Institute Human BAC Library) complete sequence	69.8	69.8	0.13	7e-08	0.84	AC116546.1
Pan troglodytes BAC clone CH251-445P21 from chromosome unknown, complete sequence	69.8	69.8	0.13	7e-08	0.84	AC157481.2
Pan troglodytes chromosome 22 clone PTB-126B09 map q21.1, complete sequence	69.8	69.8	0.13	7e-08	0.84	AL954209.1
Homo sapiens 3 BAC RP11-454H13 (Roswell Park Cancer Institute Human BAC Library) complete sequence	69.8	69.8	0.14	7e-08	0.83	AC084198.31
Human DNA sequence from clone RP11-577O19 on chromosome 1, complete sequence	69.8	69.8	0.13	7e-08	0.84	AL672045.11
Homo sapiens chromosome 17, clone RP11-501C14, complete sequence	69.8	69.8	0.13	7e-08	0.84	AC091133.11
Homo sapiens chromosome 3 clone RP11-1022P15 map 3p, complete sequence	69.8	69.8	0.13	7e-08	0.83	AC069461.2
Human DNA sequence from clone RP11-511D14 on chromosome 6p23-24.3, complete sequence	69.8	69.8	0.12	7e-08	0.86	AL355137.23
Homo sapiens chromosome 19 clone CTB-14D10, complete sequence	69.8	69.8	0.13	7e-08	0.83	AC008623.4
Human DNA sequence from clone RP4-719K3 on chromosome Xq21.1-21.31, complete sequence	69.8	69.8	0.13	7e-08	0.84	AL109931.18
Human DNA sequence from clone RP11-380D15 on chromosome 20, complete sequence	69.8	69.8	0.12	7e-08	0.85	AL139824.22
Homo sapiens chromosome 21 segment HS21C049	69.8	69.8	0.13	7e-08	0.84	AL163249.2

## Sheet: CD33_cdtBpos
Description	Max score	Total score	Query cover	E value	Ident	Accession
Eubacterium rectale DSM 17629 draft genome	1175	1175	0.9	0.0	0.97	FP929042.1
Eubacterium rectale M104/1 draft genome	1173	1173	0.91	0.0	0.96	FP929043.1
[Eubacterium rectale] ATCC 33656, complete genome	1141	1141	0.86	0.0	0.97	CP001107.1
[Eubacterium] eligens ATCC 27750, complete genome	201	271	0.57	3e-47	0.73	CP001104.1
Roseburia hominis A2-183, complete genome	196	196	0.43	1e-45	0.73	CP003040.1
Clostridiales sp. SM4/1 draft genome	174	174	0.34	4e-39	0.74	FP929060.1
Clostridium saccharolyticum-like K10 draft genome	174	174	0.34	4e-39	0.74	FP929037.1
Ruminococcus obeum A2-162 draft genome	168	168	0.41	2e-37	0.72	FP929054.1
Lachnoclostridium sp. YL32, complete genome	163	163	0.37	7e-36	0.72	CP015399.2
[Clostridium] bolteae strain ATCC BAA-613, complete genome	154	154	0.37	3e-33	0.72	CP022464.2
Eubacterium limosum strain SA11, complete genome	145	145	0.35	2e-30	0.72	CP011914.1
Roseburia intestinalis XB6B4 draft genome	136	136	0.37	9e-28	0.71	FP929050.1
Roseburia intestinalis M50/1 draft genome	132	132	0.37	1e-26	0.71	FP929049.1
Thermoanaerobacterium thermosaccharolyticum strain TG57, complete genome	125	125	0.34	2e-24	0.7	CP016893.1
Eubacterium limosum strain ATCC 8486, complete genome	125	125	0.33	2e-24	0.71	CP019962.1
Oscillibacter valericigenes Sjm18-20 DNA, complete genome	120	120	0.31	7e-23	0.71	AP012044.1
Ruminococcaceae bacterium CPB6, complete genome	116	116	0.31	9e-22	0.7	CP020705.1
Eubacterium limosum KIST612, complete genome	116	116	0.33	9e-22	0.7	CP002273.2
Thermoanaerobacterium thermosaccharolyticum M0795, complete genome	113	113	0.34	1e-20	0.69	CP003066.1
Thermoanaerobacterium thermosaccharolyticum DSM 571, complete genome	113	197	0.4	1e-20	0.69	CP002171.1
Flavonifractor plautii strain YL31, complete genome	111	111	0.3	4e-20	0.71	CP015406.2
Butyrivibrio hungatei strain MB2003 chromosome I, complete sequence	107	107	0.33	4e-19	0.69	CP017831.1
[Clostridium] cellulolyticum H10, complete genome	107	107	0.38	4e-19	0.69	CP001348.1
Butyrivibrio proteoclasticus B316 chromosome 1, complete sequence	105	105	0.33	2e-18	0.7	CP001810.1
Wolinella succinogenes, complete genome; segment 4/7	100	100	0.18	7e-17	0.75	BX571660.1
Ruminococcus champanellensis type strain 18P13T draft genome	95.1	95.1	0.31	3e-15	0.69	FP929052.1
Sulfurospirillum halorespirans DSM 13726, complete genome	93.3	93.3	0.18	1e-14	0.74	CP017111.1
Sulfurospirillum cavolei DNA, complete genome	93.3	93.3	0.27	1e-14	0.7	AP014724.1
Thermoanaerobacterium saccharolyticum JW/SL-YS485, complete genome	93.3	93.3	0.29	1e-14	0.69	CP003184.1
[Clostridium] clariflavum DSM 19732, complete genome	91.5	166	0.4	3e-14	0.72	CP003065.1
Sulfurospirillum multivorans DSM 12446, complete genome	89.7	89.7	0.2	1e-13	0.72	CP007201.1
Sphaerochaeta pleomorpha str. Grapes, complete genome	89.7	89.7	0.3	1e-13	0.68	CP003155.1
Sulfurospirillum sp. SL2-2 genome	87.8	87.8	0.2	4e-13	0.72	CP021979.1
Sulfurospirillum sp. SL2-1, complete genome	87.8	87.8	0.2	4e-13	0.72	CP021416.1
Thermoanaerobacter brockii subsp. finnii Ako-1, complete genome	87.8	87.8	0.26	4e-13	0.69	CP002466.1
Thermoanaerobacter sp. X513, complete genome	87.8	250	0.4	4e-13	0.69	CP002210.1
Thermoanaerobacter pseudethanolicus ATCC 33223, complete genome	87.8	87.8	0.26	4e-13	0.69	CP000924.1
Thermoanaerobacter sp. X514, complete genome	87.8	250	0.4	4e-13	0.69	CP000923.1
Ruminiclostridium sp. KB18, complete genome	86.0	86.0	0.36	1e-12	0.67	CP015400.2
Clostridium beijerinckii strain BAS/B3/I/124, complete genome	86.0	86.0	0.12	1e-12	0.78	CP016090.1
Clostridium beijerinckii strain NCIMB 14988, complete genome	86.0	86.0	0.12	1e-12	0.78	CP010086.2
Clostridium beijerinckii ATCC 35702, complete genome	86.0	86.0	0.12	1e-12	0.78	CP006777.1
Butyrivibrio fibrisolvens 16/4 draft genome	86.0	161	0.39	1e-12	0.68	FP929036.1
Clostridium beijerinckii NCIMB 8052, complete genome	86.0	86.0	0.12	1e-12	0.78	CP000721.1
Fervidobacterium islandicum strain AW-1, complete genome	84.2	84.2	0.4	5e-12	0.66	CP014334.1
Defluviitoga tunisiensis genome assembly DTL3, chromosome : I	84.2	84.2	0.4	5e-12	0.66	LN824141.1
Sulfurospirillum sp. UCH001 DNA, complete genome	84.2	84.2	0.18	5e-12	0.73	AP014723.1
Pseudothermotoga elfii DSM 9442 = NBRC 107921 DNA, complete genome	84.2	84.2	0.4	5e-12	0.66	AP014507.1
Fervidobacterium pennivorans DSM 9078, complete genome	84.2	84.2	0.4	5e-12	0.66	CP003260.1
Mahella australiensis 50-1 BON, complete genome	84.2	84.2	0.4	5e-12	0.66	CP002360.1
Petrotoga mobilis SJ95, complete genome	84.2	84.2	0.4	5e-12	0.66	CP000879.1
Fervidobacterium nodosum Rt17-B1, complete genome	84.2	84.2	0.4	5e-12	0.66	CP000771.1
Caldicellulosiruptor saccharolyticus DSM 8903, complete genome	84.2	84.2	0.4	5e-12	0.66	CP000679.1
Clostridium beijerinckii isolate C. beijerinckii DSM 6423 genome assembly, chromosome: I	82.4	128	0.3	2e-11	0.78	LN908213.1
Clostridium beijerinckii NRRL B-598, complete genome	80.6	80.6	0.12	6e-11	0.77	CP011966.2
[Clostridium] stercorarium subsp. leptospartum DSM 9219, complete genome	80.6	80.6	0.26	6e-11	0.69	CP014673.1
[Clostridium] stercorarium subsp. thermolacticum DSM 2910, complete genome	80.6	80.6	0.26	6e-11	0.69	CP014672.1
Clostridium stercorarium subsp. stercorarium DSM 8532, complete genome	80.6	80.6	0.26	6e-11	0.69	CP003992.2
Clostridium stercorarium subsp. stercorarium DSM 8532, complete genome	80.6	80.6	0.26	6e-11	0.69	CP004044.1
Mogibacterium pumilum strain ATCC 700696 genome	78.8	78.8	0.17	2e-10	0.72	CP016199.1
Geosporobacter ferrireducens strain IRF9, complete genome	78.8	141	0.24	2e-10	0.7	CP017269.1
Ruminiclostridium thermocellum DSM 2360, complete genome	78.8	78.8	0.33	2e-10	0.67	CP016502.1
Ruminiclostridium thermocellum AD2, complete genome	78.8	78.8	0.33	2e-10	0.67	CP013828.1
Thermoanaerobacter kivui strain DSM 2030, complete genome	78.8	78.8	0.26	2e-10	0.68	CP009170.1
Ruminiclostridium thermocellum DSM 1313, complete genome	78.8	78.8	0.33	2e-10	0.67	CP002416.1
Ruminiclostridium thermocellum ATCC 27405, complete genome	78.8	78.8	0.33	2e-10	0.67	CP000568.1
Thermoanaerobacter mathranii subsp. mathranii str. A3, complete genome	77.0	77.0	0.33	8e-10	0.67	CP002032.1
Thermoanaerobacter italicus Ab9, complete genome	77.0	77.0	0.33	8e-10	0.67	CP001936.1
Alkaliphilus metalliredigens QYMF, complete genome	75.2	75.2	0.28	3e-09	0.67	CP000724.1
Acholeplasma oculi genome assembly Acholeplasma oculi strain 19L, chromosome : 1	73.4	73.4	0.38	9e-09	0.66	LK028559.1
Filifactor alocis ATCC 35896, complete genome	71.6	71.6	0.36	3e-08	0.65	CP002390.1
Thermoanaerobacter tengcongensis MB4, complete genome	71.6	71.6	0.33	3e-08	0.66	AE008691.1
Desulfitobacterium hafniense Y51 DNA, complete genome	71.6	71.6	0.37	3e-08	0.66	AP008230.1
Dehalobacter sp. CF, complete genome	69.8	69.8	0.2	1e-07	0.7	CP003870.1
Dehalobacter sp. DCA, complete genome	69.8	69.8	0.2	1e-07	0.7	CP003869.1
Clostridium acetobutylicum DSM 1731, complete genome	69.8	69.8	0.12	1e-07	0.76	CP002660.1
Treponema succinifaciens DSM 2489, complete genome	69.8	69.8	0.12	1e-07	0.76	CP002631.1
Clostridium acetobutylicum EA 2018, complete genome	69.8	69.8	0.12	1e-07	0.76	CP002118.1
Clostridium acetobutylicum ATCC 824, complete genome	69.8	69.8	0.12	1e-07	0.76	AE001437.1
complete chromosome Acholeplasma brassicae	68.0	68.0	0.35	4e-07	0.65	FO681348.1
Clostridium saccharobutylicum strain NCP 195, complete genome	66.2	66.2	0.12	1e-06	0.74	CP016092.1
Clostridium saccharobutylicum strain NCP 258, complete genome	66.2	66.2	0.12	1e-06	0.74	CP016091.1
Clostridium saccharobutylicum strain BAS/B3/SW/136, complete genome	66.2	66.2	0.12	1e-06	0.74	CP016089.1
Clostridium saccharobutylicum strain NCP 200, complete genome	66.2	66.2	0.12	1e-06	0.74	CP016086.1
Clostridium pasteurianum strain M150B, complete genome	66.2	66.2	0.12	1e-06	0.74	CP013019.1
Clostridium pasteurianum DSM 525 = ATCC 6013, complete genome	66.2	66.2	0.12	1e-06	0.74	CP013018.1
Herbinix sp. SD1D genome assembly SD1D, chromosome : I	66.2	66.2	0.19	1e-06	0.69	LN879430.1
Clostridium pasteurianum DSM 525 = ATCC 6013, complete genome	66.2	66.2	0.12	1e-06	0.74	CP009268.1
Clostridium pasteurianum DSM 525 = ATCC 6013, complete genome	66.2	66.2	0.12	1e-06	0.74	CP009267.1
Clostridium saccharobutylicum DSM 13864, complete genome	66.2	66.2	0.12	1e-06	0.74	CP006721.1
Alkaliphilus oremlandii OhILAs, complete genome	66.2	66.2	0.27	1e-06	0.67	CP000853.1
Clostridium novyi NT, complete genome	64.4	125	0.38	5e-06	0.68	CP000382.1
Clostridium estertheticum subsp. estertheticum strain DSM 8809, complete genome	62.6	62.6	0.16	2e-05	0.7	CP015756.1
Dehalobacter restrictus DSM 9455, complete genome	62.6	62.6	0.29	2e-05	0.66	CP007033.1
Clostridium carboxidivorans P7, complete genome	60.8	60.8	0.12	6e-05	0.73	CP011803.1
Clostridium pasteurianum BC1, complete genome	60.8	60.8	0.12	6e-05	0.73	CP003261.1
[Clostridium] sphenoides JCM 1415 strain ATCC 19403 genome assembly, chromosome: I	59.0	59.0	0.17	0.0002	0.7	LT630003.1
Clostridium botulinum strain CDC_69096, complete genome	57.2	57.2	0.12	0.0007	0.72	CP013857.1
Clostridium botulinum strain CDC_53174, complete genome	57.2	57.2	0.12	0.0007	0.72	CP013247.1
Clostridium butyricum strain CDC_51208 plasmid pNPD4_2, complete sequence	57.2	57.2	0.12	0.0007	0.72	CP013238.1

## Sheet:  CD33_cdtBrev
Description	Max score	Total score	Query cover	E value	Ident	Accession
Eubacterium rectale M104/1 draft genome	1175	1175	0.92	0.0	0.96	FP929043.1
Eubacterium rectale DSM 17629 draft genome	1173	1173	0.92	0.0	0.96	FP929042.1
[Eubacterium rectale] ATCC 33656, complete genome	1146	1146	0.92	0.0	0.95	CP001107.1
[Eubacterium] eligens ATCC 27750, complete genome	201	249	0.52	3e-47	0.73	CP001104.1
Roseburia hominis A2-183, complete genome	196	196	0.43	1e-45	0.73	CP003040.1
Clostridiales sp. SM4/1 draft genome	174	174	0.34	4e-39	0.74	FP929060.1
Clostridium saccharolyticum-like K10 draft genome	174	174	0.34	4e-39	0.74	FP929037.1
Ruminococcus obeum A2-162 draft genome	168	168	0.41	2e-37	0.72	FP929054.1
Lachnoclostridium sp. YL32, complete genome	163	163	0.37	7e-36	0.72	CP015399.2
[Clostridium] bolteae strain ATCC BAA-613, complete genome	154	154	0.37	3e-33	0.72	CP022464.2
Eubacterium limosum strain SA11, complete genome	145	145	0.35	2e-30	0.72	CP011914.1
Roseburia intestinalis XB6B4 draft genome	136	136	0.37	9e-28	0.71	FP929050.1
Roseburia intestinalis M50/1 draft genome	132	132	0.37	1e-26	0.71	FP929049.1
Thermoanaerobacterium thermosaccharolyticum strain TG57, complete genome	125	125	0.34	2e-24	0.7	CP016893.1
Eubacterium limosum strain ATCC 8486, complete genome	125	125	0.33	2e-24	0.71	CP019962.1
Oscillibacter valericigenes Sjm18-20 DNA, complete genome	120	120	0.31	7e-23	0.71	AP012044.1
Ruminococcaceae bacterium CPB6, complete genome	116	116	0.32	9e-22	0.7	CP020705.1
Eubacterium limosum KIST612, complete genome	116	116	0.33	9e-22	0.7	CP002273.2
Thermoanaerobacterium thermosaccharolyticum M0795, complete genome	113	113	0.34	1e-20	0.69	CP003066.1
Thermoanaerobacterium thermosaccharolyticum DSM 571, complete genome	113	197	0.4	1e-20	0.69	CP002171.1
Flavonifractor plautii strain YL31, complete genome	111	111	0.3	4e-20	0.71	CP015406.2
Butyrivibrio hungatei strain MB2003 chromosome I, complete sequence	107	107	0.33	4e-19	0.69	CP017831.1
[Clostridium] cellulolyticum H10, complete genome	107	107	0.38	4e-19	0.69	CP001348.1
Butyrivibrio proteoclasticus B316 chromosome 1, complete sequence	105	105	0.33	2e-18	0.7	CP001810.1
Wolinella succinogenes, complete genome; segment 4/7	100	100	0.18	7e-17	0.75	BX571660.1
Ruminococcus champanellensis type strain 18P13T draft genome	95.1	95.1	0.31	3e-15	0.69	FP929052.1
Sulfurospirillum halorespirans DSM 13726, complete genome	93.3	93.3	0.18	1e-14	0.74	CP017111.1
Sulfurospirillum cavolei DNA, complete genome	93.3	93.3	0.27	1e-14	0.7	AP014724.1
Thermoanaerobacterium saccharolyticum JW/SL-YS485, complete genome	93.3	93.3	0.29	1e-14	0.69	CP003184.1
[Clostridium] clariflavum DSM 19732, complete genome	91.5	166	0.4	3e-14	0.72	CP003065.1
Sulfurospirillum multivorans DSM 12446, complete genome	89.7	89.7	0.2	1e-13	0.72	CP007201.1
Sphaerochaeta pleomorpha str. Grapes, complete genome	89.7	89.7	0.31	1e-13	0.68	CP003155.1
Sulfurospirillum sp. SL2-2 genome	87.8	87.8	0.2	4e-13	0.72	CP021979.1
Sulfurospirillum sp. SL2-1, complete genome	87.8	87.8	0.2	4e-13	0.72	CP021416.1
Thermoanaerobacter brockii subsp. finnii Ako-1, complete genome	87.8	87.8	0.26	4e-13	0.69	CP002466.1
Thermoanaerobacter sp. X513, complete genome	87.8	250	0.4	4e-13	0.69	CP002210.1
Thermoanaerobacter pseudethanolicus ATCC 33223, complete genome	87.8	87.8	0.26	4e-13	0.69	CP000924.1
Thermoanaerobacter sp. X514, complete genome	87.8	250	0.4	4e-13	0.69	CP000923.1
Ruminiclostridium sp. KB18, complete genome	86.0	86.0	0.36	1e-12	0.67	CP015400.2
Butyrivibrio fibrisolvens 16/4 draft genome	86.0	161	0.39	1e-12	0.68	FP929036.1
Fervidobacterium islandicum strain AW-1, complete genome	84.2	84.2	0.4	5e-12	0.66	CP014334.1
Defluviitoga tunisiensis genome assembly DTL3, chromosome : I	84.2	84.2	0.4	5e-12	0.66	LN824141.1
Sulfurospirillum sp. UCH001 DNA, complete genome	84.2	84.2	0.18	5e-12	0.73	AP014723.1
Pseudothermotoga elfii DSM 9442 = NBRC 107921 DNA, complete genome	84.2	84.2	0.4	5e-12	0.66	AP014507.1
Fervidobacterium pennivorans DSM 9078, complete genome	84.2	84.2	0.4	5e-12	0.66	CP003260.1
Mahella australiensis 50-1 BON, complete genome	84.2	84.2	0.4	5e-12	0.66	CP002360.1
Petrotoga mobilis SJ95, complete genome	84.2	84.2	0.4	5e-12	0.66	CP000879.1
Fervidobacterium nodosum Rt17-B1, complete genome	84.2	84.2	0.4	5e-12	0.66	CP000771.1
Caldicellulosiruptor saccharolyticus DSM 8903, complete genome	84.2	84.2	0.4	5e-12	0.66	CP000679.1
[Clostridium] stercorarium subsp. leptospartum DSM 9219, complete genome	80.6	80.6	0.27	6e-11	0.69	CP014673.1
[Clostridium] stercorarium subsp. thermolacticum DSM 2910, complete genome	80.6	80.6	0.27	6e-11	0.69	CP014672.1
Clostridium stercorarium subsp. stercorarium DSM 8532, complete genome	80.6	80.6	0.27	6e-11	0.69	CP003992.2
Clostridium stercorarium subsp. stercorarium DSM 8532, complete genome	80.6	80.6	0.27	6e-11	0.69	CP004044.1
Mogibacterium pumilum strain ATCC 700696 genome	78.8	78.8	0.18	2e-10	0.72	CP016199.1
Geosporobacter ferrireducens strain IRF9, complete genome	78.8	141	0.24	2e-10	0.7	CP017269.1
Ruminiclostridium thermocellum DSM 2360, complete genome	78.8	78.8	0.33	2e-10	0.67	CP016502.1
Ruminiclostridium thermocellum AD2, complete genome	78.8	78.8	0.33	2e-10	0.67	CP013828.1
Thermoanaerobacter kivui strain DSM 2030, complete genome	78.8	78.8	0.26	2e-10	0.68	CP009170.1
Ruminiclostridium thermocellum DSM 1313, complete genome	78.8	78.8	0.33	2e-10	0.67	CP002416.1
Ruminiclostridium thermocellum ATCC 27405, complete genome	78.8	78.8	0.33	2e-10	0.67	CP000568.1
Thermoanaerobacter mathranii subsp. mathranii str. A3, complete genome	77.0	77.0	0.33	7e-10	0.67	CP002032.1
Thermoanaerobacter italicus Ab9, complete genome	77.0	77.0	0.33	7e-10	0.67	CP001936.1
Alkaliphilus metalliredigens QYMF, complete genome	75.2	75.2	0.28	3e-09	0.67	CP000724.1
Acholeplasma oculi genome assembly Acholeplasma oculi strain 19L, chromosome : 1	73.4	73.4	0.38	9e-09	0.66	LK028559.1
Filifactor alocis ATCC 35896, complete genome	71.6	71.6	0.36	3e-08	0.65	CP002390.1
Thermoanaerobacter tengcongensis MB4, complete genome	71.6	71.6	0.33	3e-08	0.66	AE008691.1
Desulfitobacterium hafniense Y51 DNA, complete genome	71.6	71.6	0.37	3e-08	0.66	AP008230.1
Dehalobacter sp. CF, complete genome	69.8	69.8	0.2	1e-07	0.7	CP003870.1
Dehalobacter sp. DCA, complete genome	69.8	69.8	0.2	1e-07	0.7	CP003869.1
complete chromosome Acholeplasma brassicae	68.0	68.0	0.36	4e-07	0.65	FO681348.1
Herbinix sp. SD1D genome assembly SD1D, chromosome : I	66.2	66.2	0.19	1e-06	0.69	LN879430.1
Alkaliphilus oremlandii OhILAs, complete genome	66.2	66.2	0.27	1e-06	0.67	CP000853.1
Clostridium novyi NT, complete genome	64.4	64.4	0.25	5e-06	0.68	CP000382.1
Clostridium estertheticum subsp. estertheticum strain DSM 8809, complete genome	62.6	62.6	0.17	2e-05	0.7	CP015756.1
Dehalobacter restrictus DSM 9455, complete genome	62.6	62.6	0.3	2e-05	0.66	CP007033.1
[Clostridium] sphenoides JCM 1415 strain ATCC 19403 genome assembly, chromosome: I	59.0	59.0	0.17	0.0002	0.7	LT630003.1
Clostridium baratii str. Sullivan, complete genome	57.2	57.2	0.18	0.0007	0.68	CP006905.1
Clostridium acetobutylicum DSM 1731, complete genome	57.2	57.2	0.09	0.0007	0.77	CP002660.1
Clostridium acetobutylicum EA 2018, complete genome	57.2	57.2	0.09	0.0007	0.77	CP002118.1
Clostridium acetobutylicum ATCC 824, complete genome	57.2	57.2	0.09	0.0007	0.77	AE001437.1
Caldicellulosiruptor kronotskyensis 2002, complete genome	55.4	55.4	0.39	0.002	0.64	CP002330.1
Desulfobacterium autotrophicum HRM2, complete genome	55.4	55.4	0.18	0.002	0.69	CP001087.1
Uncultured bacterium BD_contig01809 genomic sequence	53.6	53.6	0.09	0.009	0.75	KJ798999.1
Treponema succinifaciens DSM 2489, complete genome	51.8	51.8	0.09	0.030	0.75	CP002631.1
Leptotrichia buccalis DSM 1135, complete genome	51.8	51.8	0.17	0.030	0.68	CP001685.1
Marinilactibacillus sp. 15R, complete genome	50.0	50.0	0.18	0.10	0.68	CP017761.1
Clostridium taeniosporum strain 1/k, complete genome	50.0	50.0	0.24	0.10	0.66	CP017253.1
Gordonibacter pamelaeae 7-10-1-b draft genome	50.0	50.0	0.07	0.10	0.77	FP929047.1
Clostridium saccharoperbutylacetonicum strain N1-504, complete genome	48.2	48.2	0.19	0.36	0.67	CP016087.1
Clostridium baratii strain CDC51267, complete genome	48.2	48.2	0.18	0.36	0.67	CP014204.1
Clostridium carboxidivorans P7, complete genome	48.2	48.2	0.09	0.36	0.75	CP011803.1
Clostridium saccharoperbutylacetonicum N1-4(HMT), complete genome	48.2	48.2	0.19	0.36	0.67	CP004121.1
Clostridium beijerinckii isolate C. beijerinckii DSM 6423 genome assembly, chromosome: I	46.4	46.4	0.18	1.3	0.67	LN908213.1
Clostridium saccharobutylicum strain NCP 195, complete genome	46.4	46.4	0.09	1.3	0.74	CP016092.1
Clostridium saccharobutylicum strain NCP 258, complete genome	46.4	46.4	0.09	1.3	0.74	CP016091.1
Clostridium saccharobutylicum strain BAS/B3/SW/136, complete genome	46.4	46.4	0.09	1.3	0.74	CP016089.1
Clostridium saccharobutylicum strain NCP 200, complete genome	46.4	46.4	0.09	1.3	0.74	CP016086.1
Leptotrichia sp. oral taxon 847, complete genome	46.4	46.4	0.27	1.3	0.65	CP014231.1
Clostridium saccharobutylicum DSM 13864, complete genome	46.4	46.4	0.09	1.3	0.74	CP006721.1
Clostridium botulinum BKT015925, complete genome	46.4	46.4	0.19	1.3	0.67	CP002410.1

## Sheet: CD41_cdtBpos
Description	Max score	Total score	Query cover	E value	Ident	Accession
Clostridium bornimense replicon M2/40_rep1, complete genome, type strain M2/40T	53.6	53.6	0.09	0.009	0.77	HG917868.1
Ovis canadensis canadensis isolate 43U chromosome 4 sequence	50.0	50.0	0.04	0.10	0.91	CP011889.1
Solanum pennellii chromosome ch01, complete genome	50.0	50.0	0.04	0.10	0.91	HG975440.1
Pan troglodytes BAC clone RP43-4P10 from chromosome 7, complete sequence	50.0	50.0	0.06	0.10	0.84	AC152419.2
Homo sapiens chromosome 8, clone RP11-26L21, complete sequence	50.0	94.5	0.06	0.10	0.82	AC023095.8
PREDICTED: Limulus polyphemus single-stranded DNA-binding protein 3-like (LOC106470852), transcript variant X10, mRNA	48.2	48.2	0.04	0.37	0.89	XM_022399494.1
PREDICTED: Limulus polyphemus single-stranded DNA-binding protein 3-like (LOC106470852), transcript variant X9, mRNA	48.2	48.2	0.04	0.37	0.89	XM_022399493.1
PREDICTED: Limulus polyphemus single-stranded DNA-binding protein 3-like (LOC106470852), transcript variant X8, mRNA	48.2	48.2	0.04	0.37	0.89	XM_022399491.1
PREDICTED: Limulus polyphemus single-stranded DNA-binding protein 3-like (LOC106470852), transcript variant X7, mRNA	48.2	48.2	0.04	0.37	0.89	XM_022399490.1
PREDICTED: Limulus polyphemus single-stranded DNA-binding protein 3-like (LOC106470852), transcript variant X6, mRNA	48.2	48.2	0.04	0.37	0.89	XM_022399489.1
PREDICTED: Limulus polyphemus single-stranded DNA-binding protein 3-like (LOC106470852), transcript variant X4, mRNA	48.2	48.2	0.04	0.37	0.89	XM_022399487.1
PREDICTED: Limulus polyphemus single-stranded DNA-binding protein 3-like (LOC106470852), transcript variant X3, mRNA	48.2	48.2	0.04	0.37	0.89	XM_022399486.1
PREDICTED: Limulus polyphemus single-stranded DNA-binding protein 3-like (LOC106470852), transcript variant X2, mRNA	48.2	48.2	0.04	0.37	0.89	XM_022399485.1
PREDICTED: Limulus polyphemus single-stranded DNA-binding protein 3-like (LOC106470852), transcript variant X1, mRNA	48.2	48.2	0.04	0.37	0.89	XM_022399484.1
Oryzias latipes strain Hd-rR chromosome 13 sequence	48.2	226	0.06	0.37	0.8	CP020677.1
Gramella sp. LPB0144, complete genome	48.2	48.2	0.05	0.37	0.87	CP018153.1
Spirometra erinaceieuropaei genome assembly S_erinaceieuropaei, scaffold SPER_scaffold0011663	48.2	48.2	0.04	0.37	0.89	LN011807.1
Toxocara canis genome assembly T_canis_Equador, scaffold TCNE_scaffold0002908	48.2	48.2	0.05	0.37	0.84	LM038932.1
Toxocara canis genome assembly T_canis_Equador, scaffold TCNE_scaffold0002585	48.2	48.2	0.06	0.37	0.8	LM038563.1
Homo sapiens FOSMID clone ABC11-48026000H2 from chromosome 4, complete sequence	48.2	48.2	0.06	0.37	0.84	AC217015.3
Homo sapiens BAC clone RP11-785F11 from 4, complete sequence	48.2	48.2	0.06	0.37	0.84	AC060835.7
Arabis alpina genome assembly, chromosome: 2	46.4	46.4	0.07	1.3	0.79	LT669789.1
Sus scrofa genome assembly, chromosome: Y	46.4	46.4	0.04	1.3	0.89	LT634572.1
Sus scrofa genome assembly, chromosome: X	46.4	46.4	0.04	1.3	0.89	LT634571.1
PREDICTED: Drosophila ficusphila ubiquitin-conjugating enzyme E2 H (LOC108098083), transcript variant X3, mRNA	46.4	46.4	0.07	1.3	0.79	XM_017200787.1
PREDICTED: Drosophila ficusphila ubiquitin-conjugating enzyme E2 H (LOC108098083), transcript variant X2, mRNA	46.4	46.4	0.07	1.3	0.79	XM_017200786.1
PREDICTED: Drosophila ficusphila ubiquitin-conjugating enzyme E2 H (LOC108098083), transcript variant X1, mRNA	46.4	46.4	0.07	1.3	0.79	XM_017200785.1
Ovis canadensis canadensis isolate 43U chromosome 18 sequence	46.4	46.4	0.06	1.3	0.8	CP011903.1
Ovis canadensis canadensis isolate 43U chromosome 8 sequence	46.4	46.4	0.03	1.3	0.93	CP011893.1
Campylobacter volucris LMG 24379, complete genome	46.4	46.4	0.09	1.3	0.74	CP007774.1
Cyprinus carpio genome assembly common carp genome, scaffold: LG40, chromosome: 40	46.4	46.4	0.04	1.3	0.88	LN590711.1
Drosophila melanogaster chromosome 3R	46.4	46.4	0.06	1.3	0.82	AE014297.3
Solanum lycopersicum chromosome ch01, complete genome	46.4	46.4	0.04	1.3	0.89	HG975513.1
Pig DNA sequence from clone CH242-228K3 on chromosome X, complete sequence	46.4	46.4	0.04	1.3	0.89	CU928462.12
Homo sapiens tyrosyl-DNA phosphodiesterase 1 (TDP1), RefSeqGene on chromosome 14	46.4	46.4	0.03	1.3	0.93	NG_009164.1
Rattus norvegicus BAC CH230-314E20 (Children's Hospital Oakland Research Institute Rat (BN/SsNHsd/MCW) BAC library) complete sequence	46.4	46.4	0.06	1.3	0.82	AC142185.5
Pan troglodytes BAC clone CH251-689A22 from chromosome 7, complete sequence	46.4	46.4	0.06	1.3	0.82	AC191679.2
Mus musculus BAC clone RP23-381H21 from chromosome 3, complete sequence	46.4	46.4	0.03	1.3	0.93	AC140303.3
Homo sapiens tyrosyl-DNA phosphodiesterase 1 (TDP1) gene, complete cds	46.4	46.4	0.03	1.3	0.93	DQ367843.1
Homo sapiens 12 BAC RP11-59H1 (Roswell Park Cancer Institute Human BAC Library) complete sequence	46.4	46.4	0.03	1.3	0.94	AC007215.49
Drosophila melanogaster, chromosome 3R, region 91D-91E, BAC clone BACR44N12, complete sequence	46.4	46.4	0.06	1.3	0.82	AC007814.6
Human chromosome 14 DNA sequence BAC R-951P22 of library RPCI-11 from chromosome 14 of Homo sapiens (Human), complete sequence	46.4	46.4	0.03	1.3	0.93	AL137128.4
Oryzias latipes strain HSOK chromosome 6	44.6	44.6	0.06	4.5	0.8	CP020626.1
Oryzias latipes strain HNI chromosome 4	44.6	44.6	0.06	4.5	0.8	CP020782.1
PREDICTED: Mus caroli BICD cargo adaptor 1 (Bicd1), transcript variant X2, mRNA	44.6	44.6	0.03	4.5	0.93	XM_021165151.1
Oryza sativa Indica Group cultivar Shuhui498 chromosome 10 sequence	44.6	44.6	0.06	4.5	0.8	CP018166.1
Oryza sativa Indica Group cultivar Shuhui498 chromosome 4 sequence	44.6	44.6	0.06	4.5	0.81	CP018160.1
Oryza sativa Indica Group cultivar Shuhui498 chromosome 1 sequence	44.6	44.6	0.06	4.5	0.81	CP018157.1
PREDICTED: Bombus terrestris G patch domain and ankyrin repeat-containing protein 1 homolog (LOC105665794), transcript variant X3, mRNA	44.6	44.6	0.04	4.5	0.91	XM_020868386.1
PREDICTED: Oncorhynchus kisutch dystroglycan-like (LOC109883770), mRNA	44.6	44.6	0.03	4.5	0.93	XM_020475802.1
Arabis alpina genome assembly, chromosome: 6	44.6	44.6	0.04	4.5	0.85	LT669793.1
Metschnikowia bicuspidata var. bicuspidata NRRL YB-4993 vacuolar ATP synthase subunit D (METBIDRAFT_33208), mRNA	44.6	44.6	0.03	4.5	0.96	XM_018856244.1
Plasmodium malariae genome assembly, chromosome: 12	44.6	44.6	0.03	4.5	0.97	LT594633.1
Plasmodium malariae genome assembly, chromosome: 10	44.6	44.6	0.06	4.5	0.81	LT594631.1
Plasmodium malariae genome assembly, chromosome: 8	44.6	44.6	0.06	4.5	0.83	LT594629.1
PREDICTED: Vigna angularis transcription termination factor MTERF15, mitochondrial (LOC108330615), mRNA	44.6	44.6	0.04	4.5	0.86	XM_017565108.1
PREDICTED: Capsicum annuum protein LATE FLOWERING-like (LOC107847258), mRNA	44.6	44.6	0.03	4.5	0.96	XM_016691449.1
Macaca fascicularis complete genome, chromosome chr2	44.6	44.6	0.04	4.5	0.89	LT160001.1
PREDICTED: Diachasma alloeum autophagy-related protein 101 (LOC107042133), mRNA	44.6	44.6	0.04	4.5	0.89	XM_015263031.1
Vigna angularis var. angularis DNA, chromosome 2, almost complete sequence, cultivar: Shumari	44.6	44.6	0.04	4.5	0.86	AP015035.1
Vigna angularis var. angularis DNA, chromosome 11, almost complete sequence, cultivar: Shumari	44.6	44.6	0.06	4.5	0.8	AP015044.1
Oryza sativa Japonica Group DNA, chromosome 11, cultivar: Nipponbare, complete sequence	44.6	44.6	0.06	4.5	0.8	AP014967.1
PREDICTED: Haplochromis burtoni GTPase IMAP family member 4-like (LOC102300930), mRNA	44.6	44.6	0.04	4.5	0.88	XM_005952771.2
Ovis canadensis canadensis isolate 43U chromosome X sequence	44.6	89.1	0.1	4.5	0.8	CP011912.1
Apteryx australis mantelli genome assembly AptMant0, scaffold scaffold38	44.6	44.6	0.03	4.5	0.96	LK066792.1
PREDICTED: Monomorium pharaonis WD repeat-containing protein 3 (LOC105831231), mRNA	44.6	44.6	0.06	4.5	0.81	XM_012671226.1
TPA: Neospora caninum Liverpool, chromosome chrXII, complete genome	44.6	44.6	0.06	4.5	0.82	LN714487.1
PREDICTED: Linepithema humile UPF0472 protein C16orf72 homolog (LOC105674757), transcript variant X2, mRNA	44.6	44.6	0.05	4.5	0.85	XM_012371308.1
PREDICTED: Linepithema humile UPF0472 protein C16orf72 homolog (LOC105674757), transcript variant X1, mRNA	44.6	44.6	0.05	4.5	0.85	XM_012371307.1
PREDICTED: Vollenhovia emeryi titin-like (LOC105559064), transcript variant X6, mRNA	44.6	44.6	0.06	4.5	0.78	XM_012007092.1
PREDICTED: Vollenhovia emeryi titin-like (LOC105559064), transcript variant X5, mRNA	44.6	44.6	0.06	4.5	0.78	XM_012007091.1
PREDICTED: Vollenhovia emeryi titin-like (LOC105559064), transcript variant X4, mRNA	44.6	44.6	0.06	4.5	0.78	XM_012007090.1
PREDICTED: Vollenhovia emeryi titin-like (LOC105559064), transcript variant X3, mRNA	44.6	44.6	0.06	4.5	0.78	XM_012007089.1
PREDICTED: Vollenhovia emeryi titin-like (LOC105559064), transcript variant X2, mRNA	44.6	44.6	0.06	4.5	0.78	XM_012007088.1
PREDICTED: Vollenhovia emeryi titin-like (LOC105559064), transcript variant X1, mRNA	44.6	44.6	0.06	4.5	0.78	XM_012007087.1
PREDICTED: Wasmannia auropunctata protein abrupt (LOC105454659), transcript variant X7, mRNA	44.6	44.6	0.05	4.5	0.85	XM_011697498.1
PREDICTED: Wasmannia auropunctata protein abrupt (LOC105454659), transcript variant X6, mRNA	44.6	44.6	0.05	4.5	0.85	XM_011697491.1
PREDICTED: Wasmannia auropunctata protein abrupt (LOC105454659), transcript variant X5, mRNA	44.6	44.6	0.05	4.5	0.85	XM_011697483.1
PREDICTED: Wasmannia auropunctata protein abrupt (LOC105454659), transcript variant X4, mRNA	44.6	44.6	0.05	4.5	0.85	XM_011697474.1
PREDICTED: Wasmannia auropunctata protein abrupt (LOC105454659), transcript variant X3, mRNA	44.6	44.6	0.05	4.5	0.85	XM_011697464.1
PREDICTED: Wasmannia auropunctata protein abrupt (LOC105454659), transcript variant X2, mRNA	44.6	44.6	0.05	4.5	0.85	XM_011697455.1
PREDICTED: Wasmannia auropunctata protein abrupt (LOC105454659), transcript variant X1, mRNA	44.6	44.6	0.05	4.5	0.85	XM_011697447.1
PREDICTED: Takifugu rubripes kelch-like family member 21 (klhl21), transcript variant X2, mRNA	44.6	44.6	0.03	4.5	0.93	XM_011602820.1
PREDICTED: Takifugu rubripes kelch-like family member 21 (klhl21), transcript variant X1, mRNA	44.6	44.6	0.03	4.5	0.93	XM_003963603.2
Leptosphaeria maculans lepidii ibcn84_scaffold00010 complete sequence	44.6	44.6	0.05	4.5	0.84	FO906014.1
Nippostrongylus brasiliensis genome assembly N_brasiliensis_RM07_v1_5_4, scaffold NBR_scaffold0002658	44.6	44.6	0.03	4.5	0.93	LM436161.1
Schistosoma curassoni genome assembly S_curassoni_Dakar, scaffold SCUD_scaffold0003856	44.6	44.6	0.04	4.5	0.86	LM069334.1
Schistosoma rodhaini genome assembly S_rodhaini_Burundi, scaffold SROB_scaffold0002420	44.6	44.6	0.04	4.5	0.85	LL959398.1
Schistosoma rodhaini genome assembly S_rodhaini_Burundi, scaffold SROB_scaffold0000039	44.6	44.6	0.03	4.5	0.94	LL957017.1
Syphacia muris genome assembly S_muris_Valencia, scaffold SMUV_scaffold0001507	44.6	44.6	0.04	4.5	0.91	LK997890.1
Cyprinus carpio genome assembly common carp genome, scaffold 000000047	44.6	44.6	0.04	4.5	0.91	LN593454.1
Cyprinus carpio genome assembly common carp genome, scaffold 000028939	44.6	44.6	0.04	4.5	0.85	LN592533.1
Cyprinus carpio genome assembly common carp genome, scaffold: LG35, chromosome: 35	44.6	89.1	0.05	4.5	0.84	LN590686.1
Solanum lycopersicum chromosome ch04, complete genome	44.6	44.6	0.05	4.5	0.83	HG975516.1
Solanum pennellii chromosome ch10, complete genome	44.6	44.6	0.07	4.5	0.81	HG975449.1
PREDICTED: Trichechus manatus latirostris phosphoinositide kinase, FYVE finger containing (LOC101359894), transcript variant X2, mRNA	44.6	44.6	0.03	4.5	0.96	XM_004378288.1
Camponotus vafer NADH dehydrogenase subunit 5 (ND5) gene, complete cds; mitochondrial	44.6	44.6	0.04	4.5	0.85	JN799659.1
Schistosoma mansoni strain Puerto Rico chromosome 2, complete genome	44.6	44.6	0.04	4.5	0.85	HE601625.1
Arcobacter sp. L DNA, complete genome	44.6	44.6	0.03	4.5	0.93	AP012048.1
Streptococcus gallolyticus subsp. gallolyticus ATCC 43143 DNA, complete genome	44.6	44.6	0.03	4.5	1	AP012053.1

## Sheet: CD41_cdtBrev
Description	Max score	Total score	Query cover	E value	Ident	Accession
Oryza glaberrima clone OG_BBa0062I05, complete sequence	55.4	55.4	0.07	0.002	0.89	AC213908.1
Zebrafish DNA sequence from clone CH211-105N9 in linkage group 20, complete sequence	55.4	55.4	0.06	0.002	0.97	BX088599.6
Clostridium bornimense replicon M2/40_rep1, complete genome, type strain M2/40T	53.6	53.6	0.13	0.006	0.77	HG917868.1
Apostasia odorata MADS28 (MADS28) gene, complete cds	50.0	50.0	0.1	0.069	0.81	KP241098.1
Solanum pennellii chromosome ch01, complete genome	50.0	50.0	0.06	0.069	0.91	HG975440.1
Gramella sp. LPB0144, complete genome	48.2	48.2	0.08	0.24	0.87	CP018153.1
PREDICTED: Falco peregrinus asparaginyl-tRNA synthetase 2, mitochondrial (putative) (NARS2), mRNA	48.2	48.2	0.05	0.24	0.94	XM_013296353.1
Haemonchus placei genome assembly H_placei_MHpl1, scaffold HPLM_scaffold0000756	48.2	48.2	0.08	0.24	0.83	LM583811.1
Canis familiaris, clone XX-266C17, complete sequence	48.2	48.2	0.09	0.24	0.82	AC205948.8
Zebrafish DNA sequence from clone CH211-132F3 in linkage group 18, complete sequence	48.2	48.2	0.06	0.24	0.92	CR457484.9
Mus musculus cDNA, clone:Y0G0110K24, strand:unspecified	48.2	48.2	0.05	0.24	0.94	AK179511.1
Arabis alpina genome assembly, chromosome: 2	46.4	46.4	0.1	0.84	0.79	LT669789.1
Ovis canadensis canadensis isolate 43U chromosome 18 sequence	46.4	46.4	0.1	0.84	0.8	CP011903.1
Ovis canadensis canadensis isolate 43U chromosome 4 sequence	46.4	46.4	0.06	0.84	0.89	CP011889.1
Ascaris lumbricoides genome assembly A_lumbricoides_Ecuador_v1_5_4, scaffold ALUE_scaffold0000618	46.4	46.4	0.06	0.84	0.85	LK872475.1
Plasmodium yoelii genome assembly PY17X01, chromosome : 14	46.4	46.4	0.08	0.84	0.84	LM993668.1
Plasmodium yoelii genome assembly PYYM01, chromosome : 14	46.4	46.4	0.08	0.84	0.84	LK934642.1
Solanum lycopersicum chromosome ch01, complete genome	46.4	46.4	0.06	0.84	0.89	HG975513.1
Candidatus Arthromitus sp. SFB-mouse-NL, complete genome	46.4	46.4	0.06	0.84	0.91	CP008713.1
Candidatus Arthromitus sp. SFB-mouse-Yit DNA, complete genome	46.4	46.4	0.06	0.84	0.91	AP012209.1
Candidatus Arthromitus sp. SFB-mouse-Japan DNA, complete genome	46.4	46.4	0.06	0.84	0.91	AP012202.1
Mus musculus BAC clone RP23-381H21 from chromosome 3, complete sequence	46.4	46.4	0.05	0.84	0.93	AC140303.3
Plasmodium yoelii yoelii str. 17XNL hypothetical protein (PY00402) partial mRNA	46.4	46.4	0.08	0.84	0.84	XM_718977.1
PREDICTED: Mus caroli BICD cargo adaptor 1 (Bicd1), transcript variant X2, mRNA	44.6	44.6	0.05	2.9	0.93	XM_021165151.1
PREDICTED: Bombus terrestris G patch domain and ankyrin repeat-containing protein 1 homolog (LOC105665794), transcript variant X3, mRNA	44.6	44.6	0.06	2.9	0.91	XM_020868386.1
PREDICTED: Crassostrea gigas uncharacterized LOC109617296 (LOC109617296), ncRNA	44.6	44.6	0.07	2.9	0.85	XR_002198436.1
Arabis alpina genome assembly, chromosome: 6	44.6	44.6	0.07	2.9	0.85	LT669793.1
Metschnikowia bicuspidata var. bicuspidata NRRL YB-4993 vacuolar ATP synthase subunit D (METBIDRAFT_33208), mRNA	44.6	44.6	0.05	2.9	0.96	XM_018856244.1
PREDICTED: Vigna angularis transcription termination factor MTERF15, mitochondrial (LOC108330615), mRNA	44.6	44.6	0.06	2.9	0.86	XM_017565108.1
PREDICTED: Capsicum annuum protein LATE FLOWERING-like (LOC107847258), mRNA	44.6	44.6	0.05	2.9	0.96	XM_016691449.1
Vigna angularis var. angularis DNA, chromosome 2, almost complete sequence, cultivar: Shumari	44.6	44.6	0.06	2.9	0.86	AP015035.1
Vigna angularis var. angularis DNA, chromosome 11, almost complete sequence, cultivar: Shumari	44.6	44.6	0.06	2.9	0.86	AP015044.1
PREDICTED: Glycine max annexin D3-like (LOC100785486), transcript variant X2, mRNA	44.6	44.6	0.08	2.9	0.84	XM_006594342.2
Oryza sativa Indica Group cultivar RP Bio-226 chromosome 3 sequence	44.6	44.6	0.06	2.9	0.87	CP012611.1
PREDICTED: Haplochromis burtoni GTPase IMAP family member 4-like (LOC102300930), mRNA	44.6	44.6	0.06	2.9	0.88	XM_005952771.2
PREDICTED: Vollenhovia emeryi titin-like (LOC105559064), transcript variant X6, mRNA	44.6	44.6	0.1	2.9	0.78	XM_012007092.1
PREDICTED: Vollenhovia emeryi titin-like (LOC105559064), transcript variant X5, mRNA	44.6	44.6	0.1	2.9	0.78	XM_012007091.1
PREDICTED: Vollenhovia emeryi titin-like (LOC105559064), transcript variant X4, mRNA	44.6	44.6	0.1	2.9	0.78	XM_012007090.1
PREDICTED: Vollenhovia emeryi titin-like (LOC105559064), transcript variant X3, mRNA	44.6	44.6	0.1	2.9	0.78	XM_012007089.1
PREDICTED: Vollenhovia emeryi titin-like (LOC105559064), transcript variant X2, mRNA	44.6	44.6	0.1	2.9	0.78	XM_012007088.1
PREDICTED: Vollenhovia emeryi titin-like (LOC105559064), transcript variant X1, mRNA	44.6	44.6	0.1	2.9	0.78	XM_012007087.1
PREDICTED: Takifugu rubripes kelch-like family member 21 (klhl21), transcript variant X2, mRNA	44.6	44.6	0.05	2.9	0.93	XM_011602820.1
PREDICTED: Takifugu rubripes kelch-like family member 21 (klhl21), transcript variant X1, mRNA	44.6	44.6	0.05	2.9	0.93	XM_003963603.2
Nippostrongylus brasiliensis genome assembly N_brasiliensis_RM07_v1_5_4, scaffold NBR_scaffold0002658	44.6	44.6	0.05	2.9	0.93	LM436161.1
Hymenolepis nana genome assembly H_nana_Japan, scaffold HNAJ_scaffold0002394	44.6	44.6	0.05	2.9	0.93	LM400927.1
Schistosoma curassoni genome assembly S_curassoni_Dakar, scaffold SCUD_scaffold0003856	44.6	44.6	0.06	2.9	0.86	LM069334.1
Schistosoma rodhaini genome assembly S_rodhaini_Burundi, scaffold SROB_scaffold0000039	44.6	44.6	0.05	2.9	0.94	LL957017.1
Syphacia muris genome assembly S_muris_Valencia, scaffold SMUV_scaffold0001507	44.6	44.6	0.06	2.9	0.91	LK997890.1
Phanerochaete carnosa HHB-10118-sp hypothetical protein (PHACADRAFT_261812), mRNA	44.6	44.6	0.05	2.9	0.93	XM_007399331.1
Camponotus vafer NADH dehydrogenase subunit 5 (ND5) gene, complete cds; mitochondrial	44.6	44.6	0.07	2.9	0.85	JN799659.1
Arcobacter sp. L DNA, complete genome	44.6	44.6	0.05	2.9	0.93	AP012048.1
M.spretus DNA sequence from clone XX-CH35_123K8 on chromosome 7, complete sequence	44.6	44.6	0.1	2.9	0.78	CU074422.1
Homo sapiens chromosome 5 clone CTB-83D3, complete sequence	44.6	44.6	0.05	2.9	0.94	AC011414.4
Homo sapiens chromosome 5 clone CTC-426L22, complete sequence	44.6	44.6	0.05	2.9	0.94	AC008491.6

## Sheet: CD44_cdtBpos
Description	Max score	Total score	Query cover	E value	Ident	Accession
Arabis alpina genome assembly, chromosome: 3	46.4	46.4	0.07	0.74	0.89	LT669790.1
Gaeumannomyces tritici R3-111a-1 carnitine O-acetyltransferase, variant mRNA	46.4	46.4	0.08	0.74	0.86	XM_009228584.1
Gaeumannomyces tritici R3-111a-1 carnitine O-acetyltransferase mRNA	46.4	46.4	0.08	0.74	0.86	XM_009228583.1
Uncultured archaeon clone rifcsplowo2_02_scaffold_201_curated genomic sequence	44.6	44.6	0.07	2.6	0.89	KY476667.1
Uncultured archaeon clone rifcsplowo2_12_scaffold_97_curated genomic sequence	44.6	44.6	0.07	2.6	0.89	KY476666.1
Uncultured archaeon clone rifcsphigho2_01_scaffold_3522_curated genomic sequence	44.6	44.6	0.07	2.6	0.89	KY476664.1
PREDICTED: Manis javanica mitochondrial ribosome recycling factor (MRRF), transcript variant X8, mRNA	44.6	44.6	0.08	2.6	0.87	XM_017673321.1
PREDICTED: Manis javanica mitochondrial ribosome recycling factor (MRRF), transcript variant X7, mRNA	44.6	44.6	0.08	2.6	0.87	XM_017673313.1
PREDICTED: Manis javanica mitochondrial ribosome recycling factor (MRRF), transcript variant X5, misc_RNA	44.6	44.6	0.08	2.6	0.87	XR_001855148.1
PREDICTED: Manis javanica mitochondrial ribosome recycling factor (MRRF), transcript variant X4, mRNA	44.6	44.6	0.08	2.6	0.87	XM_017673292.1
Chryseobacterium sp. IHB B 10212 strain IHBB 10212, complete genome	44.6	44.6	0.05	2.6	0.96	CP015199.1
PREDICTED: Pteropus alecto SECIS binding protein 2-like (SECISBP2L), transcript variant X2, mRNA	44.6	44.6	0.07	2.6	0.88	XM_015596052.1
PREDICTED: Pteropus alecto SECIS binding protein 2-like (SECISBP2L), transcript variant X1, mRNA	44.6	44.6	0.07	2.6	0.88	XM_006920383.2
Vigna angularis var. angularis DNA, chromosome 1, almost complete sequence, cultivar: Shumari	44.6	44.6	0.08	2.6	0.87	AP015034.1
Uncultured archaeon clone gwa2_scaffold_32 genomic sequence	44.6	44.6	0.07	2.6	0.89	KP308564.1
Archaeon GW2011_AR20, complete genome	44.6	44.6	0.07	2.6	0.89	CP010426.1
Dracunculus medinensis genome assembly D_medinensis_Ghana, scaffold DME_scaffold0000006	44.6	44.6	0.08	2.6	0.85	LK978194.1
Parascaris equorum genome assembly P_equorum, scaffold PEQ_scaffold0004626	44.6	44.6	0.05	2.6	0.96	LM467390.1
Oryzias latipes strain HSOK chromosome 7	42.8	42.8	0.05	9.0	0.93	CP020627.1
Oryzias latipes strain HNI chromosome 7	42.8	42.8	0.05	9.0	0.93	CP020785.1
Oryzias latipes strain Hd-rR chromosome 7 sequence	42.8	42.8	0.05	9.0	0.93	CP020671.1
PREDICTED: Bombyx mori ER degradation-enhancing alpha-mannosidase-like protein 2 (LOC101743683), transcript variant X1, mRNA	42.8	42.8	0.11	9.0	0.79	XM_004927740.3
PREDICTED: Sus scrofa F-box protein 5 (FBXO5), transcript variant X4, mRNA	42.8	42.8	0.06	9.0	0.88	XM_013992481.2
PREDICTED: Sus scrofa F-box protein 5 (FBXO5), transcript variant X3, mRNA	42.8	42.8	0.06	9.0	0.88	XM_013992480.2
PREDICTED: Sus scrofa F-box protein 5 (FBXO5), transcript variant X2, mRNA	42.8	42.8	0.06	9.0	0.88	XM_013992479.2
PREDICTED: Sus scrofa F-box protein 5 (FBXO5), transcript variant X1, mRNA	42.8	42.8	0.06	9.0	0.88	XM_003121138.4
PREDICTED: Amphimedon queenslandica uncharacterized LOC109586316 (LOC109586316), mRNA	42.8	42.8	0.07	9.0	0.86	XM_020002489.1
Burkholderia vietnamiensis strain FL-2-3-30-S1-D0 chromosome 1, complete sequence	42.8	42.8	0.07	9.0	0.89	CP013393.1
TPA: Oryzias latipes strain Hd-rR, complete genome assembly, chromosome 7	42.8	42.8	0.05	9.0	0.93	HF933213.1
Pongo pygmaeus genome assembly, chromosome: XII	42.8	42.8	0.04	9.0	1	LT571452.1
Pan troglodytes chromosome 9 clone CH251-548I4, complete sequence	42.8	42.8	0.04	9.0	1	AC270583.1
Tenacibaculum dicentrarchi strain AY7486TD, complete genome	42.8	42.8	0.08	9.0	0.85	CP013671.1
Vigna angularis var. angularis DNA, chromosome 11, almost complete sequence, cultivar: Shumari	42.8	42.8	0.13	9.0	0.76	AP015044.1
Vigna angularis var. angularis DNA, chromosome 8, almost complete sequence, cultivar: Shumari	42.8	42.8	0.05	9.0	0.93	AP015041.1
Bordetella sp. N genome	42.8	42.8	0.05	9.0	0.93	CP013111.1
PREDICTED: Papilio xuthus sushi, von Willebrand factor type A, EGF and pentraxin domain-containing protein 1 (LOC106126341), mRNA	42.8	42.8	0.07	9.0	0.85	XM_013323951.1
Ovis canadensis canadensis isolate 43U chromosome 23 sequence	42.8	42.8	0.09	9.0	0.82	CP011908.1
Ovis canadensis canadensis isolate 43U chromosome 11 sequence	42.8	42.8	0.06	9.0	0.93	CP011896.1
Ovis canadensis canadensis isolate 43U chromosome 8 sequence	42.8	42.8	0.07	9.0	0.89	CP011893.1
Ovis canadensis canadensis isolate 43U chromosome 3 sequence	42.8	42.8	0.05	9.0	0.93	CP011888.1
Apteryx australis mantelli genome assembly AptMant0, scaffold scaffold86	42.8	42.8	0.05	9.0	0.96	LK065141.1
Apteryx australis mantelli genome assembly AptMant0, scaffold scaffold50	42.8	42.8	0.06	9.0	0.93	LK064705.1
Cucumis melo genomic chromosome, chr_3	42.8	42.8	0.05	9.0	0.93	LN713257.1
Cucumis melo genomic scaffold, anchoredscaffold01598	42.8	42.8	0.05	9.0	0.93	LN681816.1
Schistocephalus solidus genome assembly S_solidus_NST_G2, scaffold SSLN_scaffold0002840	42.8	42.8	0.04	9.0	1	LL903062.1
Dracunculus medinensis genome assembly D_medinensis_Ghana, scaffold DME_contig0000104	42.8	42.8	0.08	9.0	0.84	LK978374.1
Nippostrongylus brasiliensis genome assembly N_brasiliensis_RM07_v1_5_4, scaffold NBR_scaffold0000810	42.8	42.8	0.08	9.0	0.85	LM434203.1
Cyprinus carpio genome assembly common carp genome, scaffold: LG5, chromosome: 5	42.8	42.8	0.08	9.0	0.83	LN590709.1
Cyprinus carpio genome assembly common carp genome, scaffold: LG31, chromosome: 31	42.8	42.8	0.06	9.0	0.88	LN590690.1
Uncultured marine benthic group E euryarchaeote clone Ma29_1A_49 16S ribosomal RNA gene, partial sequence	42.8	42.8	0.09	9.0	0.8	HM103846.1
Lymphocystis disease virus - isolate China, complete genome	42.8	42.8	0.08	9.0	0.85	AY380826.1
Homo sapiens Chromosome 16 BAC clone CIT987SK-A-152E5, complete sequence	42.8	42.8	0.07	9.0	0.86	AC004382.1
Human DNA sequence from clone RP11-498P14 on chromosome 9, complete sequence	42.8	42.8	0.04	9.0	1	AL590705.9
Human DNA sequence from clone RP11-255A11 on chromosome 9, complete sequence	42.8	42.8	0.04	9.0	1	AL139008.10
Homo sapiens 12 BAC RP11-239A17 (Roswell Park Cancer Institute Human BAC Library) complete sequence	42.8	42.8	0.04	9.0	1	AC024095.13

## Sheet: CD44_cdtBrev
Description	Max score	Total score	Query cover	E value	Ident	Accession
Apostasia odorata MADS28 (MADS28) gene, complete cds	50.0	50.0	0.09	0.077	0.81	KP241098.1
Haemonchus placei genome assembly H_placei_MHpl1, scaffold HPLM_scaffold0000756	48.2	48.2	0.07	0.27	0.83	LM583811.1
Dicrocoelium dendriticum genome assembly D_dendriticum_Leon_v1_0_4, scaffold DDEL_scaffold0061248	48.2	48.2	0.06	0.27	0.89	LK456934.1
Bacillus cereus FRI-35, complete genome	48.2	48.2	0.11	0.27	0.79	CP003747.1
Canis familiaris, clone XX-266C17, complete sequence	48.2	48.2	0.08	0.27	0.82	AC205948.8
Zebrafish DNA sequence from clone CH211-132F3 in linkage group 18, complete sequence	48.2	48.2	0.06	0.27	0.92	CR457484.9
Arabis alpina genome assembly, chromosome: 8	46.4	46.4	0.06	0.94	0.85	LT669795.1
Arabis alpina genome assembly, chromosome: 3	46.4	46.4	0.06	0.94	0.89	LT669790.1
PREDICTED: Gossypium raimondii serine-threonine kinase receptor-associated protein (LOC105777734), transcript variant X1, mRNA	46.4	46.4	0.08	0.94	0.81	XM_012601130.1
Dracunculus medinensis genome assembly D_medinensis_Ghana, scaffold DME_scaffold0000093	46.4	46.4	0.08	0.94	0.81	LK978404.1
Cyprinus carpio genome assembly common carp genome, scaffold 000001618	46.4	46.4	0.07	0.94	0.86	LN591069.1
Cyprinus carpio genome assembly common carp genome, scaffold: LG18, chromosome: 18	46.4	46.4	0.06	0.94	0.89	LN590684.1
Cyprinus carpio genome assembly common carp genome, scaffold: LG44, chromosome: 44	46.4	46.4	0.07	0.94	0.86	LN590675.1
Plasmodium yoelii genome assembly PY17X01, chromosome : 14	46.4	46.4	0.07	0.94	0.84	LM993668.1
Plasmodium yoelii genome assembly PYYM01, chromosome : 14	46.4	46.4	0.07	0.94	0.84	LK934642.1
Solanum pennellii chromosome ch12, complete genome	46.4	46.4	0.06	0.94	0.9	HG975451.1
Solanum pennellii chromosome ch11, complete genome	46.4	46.4	0.06	0.94	0.9	HG975450.1
Candidatus Arthromitus sp. SFB-mouse-NL, complete genome	46.4	46.4	0.05	0.94	0.91	CP008713.1
Candidatus Arthromitus sp. SFB-mouse-Yit DNA, complete genome	46.4	46.4	0.05	0.94	0.91	AP012209.1
Candidatus Arthromitus sp. SFB-mouse-Japan DNA, complete genome	46.4	46.4	0.05	0.94	0.91	AP012202.1
Populus trichocarpa clone POP037-A02, complete sequence	46.4	46.4	0.13	0.94	0.76	AC213922.1
Human DNA sequence from clone RP11-399D6 on chromosome 9, complete sequence	46.4	46.4	0.06	0.94	0.87	AL645734.1
Plasmodium yoelii yoelii str. 17XNL hypothetical protein (PY00402) partial mRNA	46.4	46.4	0.07	0.94	0.84	XM_718977.1
Staphylococcus epidermidis strain ATCC 12228, complete genome	44.6	44.6	0.05	3.3	0.94	CP022247.1
PREDICTED: Bombus terrestris G patch domain and ankyrin repeat-containing protein 1 homolog (LOC105665794), transcript variant X3, mRNA	44.6	44.6	0.05	3.3	0.91	XM_020868386.1
Uncultured archaeon clone rifcsplowo2_02_scaffold_201_curated genomic sequence	44.6	44.6	0.06	3.3	0.89	KY476667.1
Uncultured archaeon clone rifcsplowo2_12_scaffold_97_curated genomic sequence	44.6	44.6	0.06	3.3	0.89	KY476666.1
Uncultured archaeon clone rifcsphigho2_01_scaffold_3522_curated genomic sequence	44.6	44.6	0.06	3.3	0.89	KY476664.1
Spirodela polyrhiza strain 9509 chromosome 2 sequence	44.6	44.6	0.06	3.3	0.85	CP019094.1
Staphylococcus epidermidis strain 14.1.R1, complete genome	44.6	44.6	0.05	3.3	0.94	CP018842.1
Francisella sp. TX077310, complete genome	44.6	44.6	0.09	3.3	0.8	CP016796.1
PREDICTED: Manis javanica mitochondrial ribosome recycling factor (MRRF), transcript variant X8, mRNA	44.6	44.6	0.06	3.3	0.87	XM_017673321.1
PREDICTED: Manis javanica mitochondrial ribosome recycling factor (MRRF), transcript variant X7, mRNA	44.6	44.6	0.06	3.3	0.87	XM_017673313.1
PREDICTED: Manis javanica mitochondrial ribosome recycling factor (MRRF), transcript variant X5, misc_RNA	44.6	44.6	0.06	3.3	0.87	XR_001855148.1
PREDICTED: Manis javanica mitochondrial ribosome recycling factor (MRRF), transcript variant X4, mRNA	44.6	44.6	0.06	3.3	0.87	XM_017673292.1
Homo sapiens LDL receptor related protein 1B (LRP1B), RefSeqGene on chromosome 2	44.6	44.6	0.06	3.3	0.89	NG_051023.1
Chryseobacterium sp. IHB B 10212 strain IHBB 10212, complete genome	44.6	44.6	0.04	3.3	0.96	CP015199.1
PREDICTED: Capsicum annuum protein LATE FLOWERING-like (LOC107847258), mRNA	44.6	44.6	0.04	3.3	0.96	XM_016691449.1
Vigna angularis var. angularis DNA, chromosome 8, almost complete sequence, cultivar: Shumari	44.6	44.6	0.14	3.3	0.76	AP015041.1
Ovis canadensis canadensis isolate 43U chromosome 2 sequence	44.6	44.6	0.06	3.3	0.86	CP011887.1
Ovis canadensis canadensis isolate 43U chromosome X sequence	44.6	44.6	0.05	3.3	0.9	CP011912.1
Uncultured archaeon clone gwa2_scaffold_32 genomic sequence	44.6	44.6	0.06	3.3	0.89	KP308564.1
Archaeon GW2011_AR20, complete genome	44.6	44.6	0.06	3.3	0.89	CP010426.1
Cucumis melo genomic chromosome, chr_10	44.6	44.6	0.08	3.3	0.82	LN713264.1
Cucumis melo genomic scaffold, anchoredscaffold00016	44.6	44.6	0.08	3.3	0.82	LN681896.1
Dracunculus medinensis genome assembly D_medinensis_Ghana, scaffold DME_scaffold0000006	44.6	44.6	0.06	3.3	0.85	LK978194.1
Strongyloides ratti genome assembly S_ratti_ED321, scaffold srae_chrx_scaffold0000002	44.6	44.6	0.05	3.3	0.94	LN609396.1
Triticum aestivum chromosome 3B, genomic scaffold, cultivar Chinese Spring	44.6	44.6	0.05	3.3	0.88	HG670306.1
Solanum lycopersicum chromosome ch12, complete genome	44.6	44.6	0.04	3.3	0.93	HG975524.1
Solanum lycopersicum chromosome ch09, complete genome	44.6	44.6	0.07	3.3	0.85	HG975521.1
Solanum lycopersicum chromosome ch07, complete genome	44.6	44.6	0.04	3.3	0.93	HG975519.1
Solanum pennellii chromosome ch09, complete genome	44.6	44.6	0.07	3.3	0.85	HG975448.1
Solanum pennellii chromosome ch08, complete genome	44.6	44.6	0.05	3.3	0.89	HG975447.1
Solanum pennellii chromosome ch02, complete genome	44.6	44.6	0.06	3.3	0.88	HG975441.1
Phanerochaete carnosa HHB-10118-sp hypothetical protein (PHACADRAFT_261812), mRNA	44.6	44.6	0.04	3.3	0.93	XM_007399331.1
Solanum lycopersicum strain Heinz 1706 chromosome 9 clone slm-15o9 map 9, complete sequence	44.6	44.6	0.07	3.3	0.85	AC254102.4
Solanum lycopersicum strain Heinz 1706 chromosome 9 clone sle-45b17 map 9, complete sequence	44.6	44.6	0.07	3.3	0.85	AC254033.5
Solanum lycopersicum strain Heinz 1706 chromosome 9 clone slm-34a22 map 9, complete sequence	44.6	44.6	0.07	3.3	0.85	AC254050.4
Solanum lycopersicum strain Heinz 1706 chromosome 9 clone sle-10h11 map 9, complete sequence	44.6	44.6	0.07	3.3	0.85	AC254011.8
Solanum lycopersicum strain Heinz 1706 chromosome 9 clone slm-6p13 map 9, complete sequence	44.6	44.6	0.07	3.3	0.85	AC254022.4
Solanum lycopersicum strain Heinz 1706 chromosome 9 clone slm-17j21 map 9, complete sequence	44.6	44.6	0.07	3.3	0.85	AC254003.4
Saprospira grandis str. Lewin, complete genome	44.6	44.6	0.08	3.3	0.77	CP002831.1
Serratia symbiotica str. 'Cinara cedri', complete genome	44.6	44.6	0.06	3.3	0.87	CP002295.1
Homo sapiens nuclear sequence of mitochondrial origin, RHNumts HSA_NumtS_151	44.6	44.6	0.09	3.3	0.78	FN674059.1
Homo sapiens 3 BAC RP11-52L11 (Roswell Park Cancer Institute Human BAC Library) complete sequence	44.6	44.6	0.09	3.3	0.78	AC063927.15
Homo sapiens 3 BAC RP11-3J16 (Roswell Park Cancer Institute Human BAC Library) complete sequence	44.6	44.6	0.09	3.3	0.78	AC112650.2
Homo sapiens BAC clone RP11-299D11 from 2, complete sequence	44.6	44.6	0.07	3.3	0.86	AC116176.4
Homo sapiens BAC clone RP11-4C18 from 2, complete sequence	44.6	44.6	0.06	3.3	0.89	AC092575.3
Carnobacterium piscicola plasmid bacteriocin CbnA (cbnA), immunity protein CbiA (cbiA), induction peptide CbaX (cbaX), histidine kinase CbaK (cbaK), response regulator CbaR (cbaR), ABC transporter CbaT (cbaT), and accessory protein CbaC (cbaC) genes, complete cds; and unknown genes	44.6	44.6	0.05	3.3	0.89	AF207838.1
